# Supplementary material for: Chiroptical and catalytic properties of doubly binaphthyl-strapped chiral porphyrins
Source: Royal Society of Chemistry journal article supplement (doi:10.1039/c8cc09114e), 2018-12-13
Supplement: c8cc09114e1.pdf [file c8cc09114e1.pdf]

**Electronic Supplementary Information**  
**for**  
**Chiroptical and catalytic properties of**  
**doubly binaphthyl-strapped chiral porphyrins**

**Chihiro Maeda,\* Kanae Ogawa, Kosuke Sadanaga, Kazuto Takaishi and Tadashi Ema\***

*Division of Applied Chemistry, Graduate School of Natural Science and Technology, Okayama University,*

*Tsushima, Okayama 700-8530, Japan. E-mail: cmaeda@okayama-u.ac.jp; ema@cc.okayama-u.ac.jp*

**Table of Contents**

|                                                    |     |
|----------------------------------------------------|-----|
| [A] Instrumentation and Materials.....             | S2  |
| [B] Experimental Procedures and Compound Data..... | S2  |
| [C] Kinetic Resolution of Styrene Oxide.....       | S14 |
| [D] References.....                                | S14 |
| [E] NMR Spectra.....                               | S15 |
| [F] Photophysical Properties.....                  | S49 |
| [G] DFT Calculation.....                           | S50 |

## [A] Instrumentation and Materials

NMR spectroscopy was performed on a JEOL 400 MHz spectrometer and chemical shifts were reported as the delta scale in ppm as internal reference  $\delta = 7.26$  ( $\text{CDCl}_3$ ) for  $^1\text{H}$  NMR, and  $\delta = 77.16$  ( $\text{CDCl}_3$ ) for  $^{13}\text{C}$  NMR. MS spectra were recorded on a Bruker micrOTOF. IR spectra were recorded on a Shimadzu IRAffinity-1 spectrophotometer. UV/Vis spectra were recorded on a Shimadzu UV-2600 spectrophotometer. Fluorescence spectra were measured on a HITACHI F-2700 spectrophotometer. Absolute fluorescence quantum yields were recorded on a Hamamatsu Photonics C9920-02 spectrometer by the photon-counting method using an integration sphere. CD spectra were recorded on a JASCO J-720 or J-1500 spectropolarimeter. CPL spectra were measured on a JASCO CPL-200. Commercial reagents were used without further purification. Compounds **3a**,<sup>[S1]</sup> **3b**,<sup>[S2]</sup> **3c**,<sup>[S3]</sup> and **3d**<sup>[S2]</sup> were prepared by the literature method. Dry  $\text{CH}_2\text{Cl}_2$  was distilled from  $\text{CaH}_2$ .

Single crystals of **1d** were obtained by slow diffusion of  $\text{CH}_3\text{CN}$  vapor into a solution of **1d** in  $\text{CH}_2\text{Cl}_2$ . X-ray data at 93 K were taken on a Rigaku XtaLAB P200 with  $\text{Cu-K}\alpha$  radiation ( $\lambda = 1.54187 \text{ \AA}$ ). The structures were solved by direct methods (SHELXS-97) and refined with full-matrix least square technique (SHELXL-97). All non-hydrogen atoms were refined anisotropically and the hydrogen atoms were calculated in ideal positions.

## [B] Experimental Procedures and Compound Data

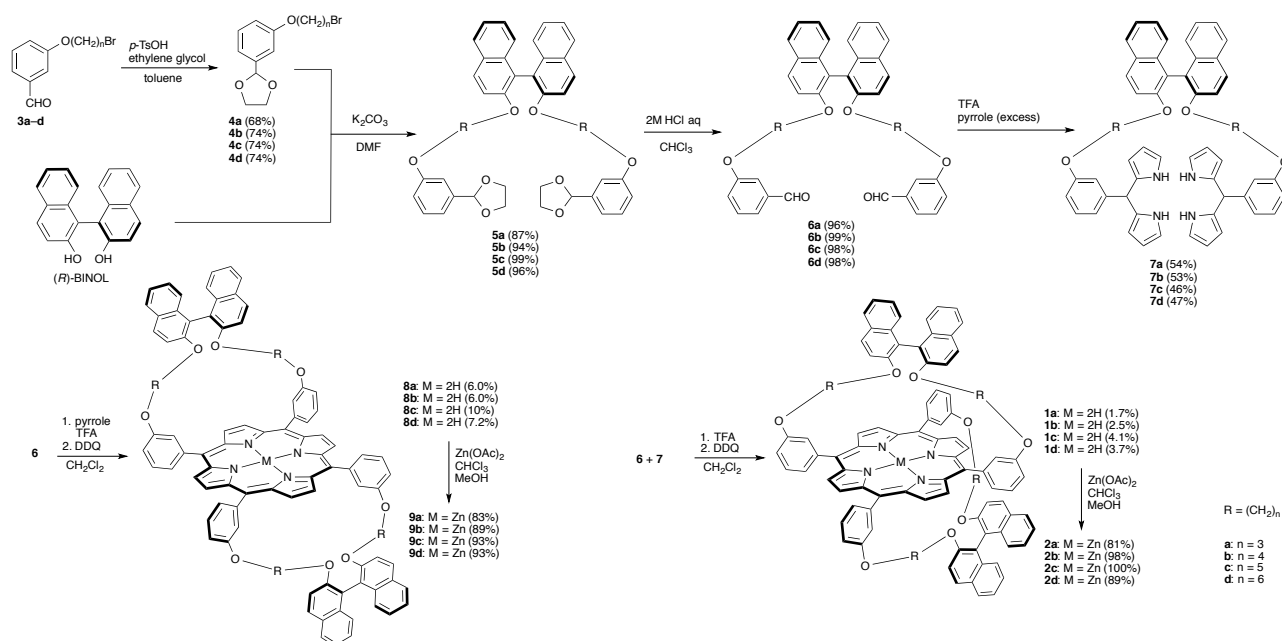

**Scheme S1** Synthesis of doubly binaphthyl strapped porphyrins **1**, **2**, **8**, and **9**.

### Synthesis of **4a**

*p*-Toluenesulfonic acid monohydrate (687 mg, 3.61 mmol) was dissolved in dry toluene (51.5 mL) under Ar. **3a** (8.78 g, 36.1 mmol) and ethylene glycol (10.1 mL, 180 mmol) were added via syringe, and the mixture was heated at reflux for 12 h. After cooling to room temperature, water was added, and the organic products were extracted with EtOAc. The organic layer was washed with saturated  $\text{NaHCO}_3$  solution and brine, dried over  $\text{Na}_2\text{SO}_4$ , and concentrated. Purification by silica gel column chromatography (hexane/EtOAc (7:1)) gave **4a** as a pale yellow oil (7.05 g, 24.5 mmol, 68%).

### Synthesis of 5a

To a flask containing (*R*)-(+)-1,1'-bi-2-naphthol (1.03 g, 3.60 mmol) and K<sub>2</sub>CO<sub>3</sub> (4.98 g, 36.0 mmol) was added a solution of **4a** (2.17 g, 7.57 mmol) in dry DMF (10.0 mL) under Ar. The mixture was heated at 100 °C for 6 h. After cooling to room temperature, the mixture was diluted with CHCl<sub>3</sub> and filtered. The solution was washed with water, dried over Na<sub>2</sub>SO<sub>4</sub>, and concentrated. Purification by silica gel column chromatography (hexane/EtOAc (2:1)) gave **5a** as a pale yellow oil (2.19 g, 3.13 mmol, 87%).

### Synthesis of 6a

2M HCl (2.70 mL) was added to a solution of **5a** (1.90 g, 2.70 mmol) in CHCl<sub>3</sub> (40.0 mL) under Ar. The mixture was heated at 50 °C for 3 h. The organic layer was separated, washed with saturated NaHCO<sub>3</sub> solution and brine, dried over Na<sub>2</sub>SO<sub>4</sub>, and concentrated to give **6a** as a pale yellow oil (1.58 g, 2.59 mmol, 96%).

### Synthesis of 7a

**6a** (973 mg, 1.59 mmol) was dissolved in pyrrole (11.0 mL, 159 mmol), and TFA (243 μL, 3.18 mmol) was added. The mixture was heated at 50 °C for 12 h under Ar. After cooling to room temperature, the reaction was quenched by addition of aqueous 10% NaOH solution. Organic products were extracted with CHCl<sub>3</sub>, and the organic layer was washed with saturated NaHCO<sub>3</sub> solution, dried over Na<sub>2</sub>SO<sub>4</sub>, and concentrated. Purification by silica gel column chromatography (hexane/EtOAc (3:1)) gave **7a** as a brownish solid (728 mg, 864 μmol, 54%).

### Synthesis of 1a

A solution of **7a** (1.03 g, 1.22 mmol) and **6a** (747 mg, 1.22 mmol) in dry CH<sub>2</sub>Cl<sub>2</sub> (245 mL) was bubbled with Ar for 20 min, and TFA (93.0 μL, 1.22 mmol) was added. The mixture was stirred at room temperature for 1 h in the dark. Et<sub>3</sub>N (510 μL, 3.67 mmol) and DDQ (1.67 g, 7.34 mmol) were added, and the mixture was stirred for 12 h. After the solvents were evaporated, purification by silica gel column chromatography (CHCl<sub>3</sub>) and recrystallization from CHCl<sub>3</sub>/MeOH gave **1a** as a purple solid (29.5 mg, 20.9 μmol, 1.7%).

### Synthesis of 2a

To a solution of **1a** (10.5 mg, 7.44 μmol) in CHCl<sub>3</sub> (1.04 mL) was added a solution of Zn(OAc)<sub>2</sub>·2H<sub>2</sub>O (16.3 mg, 74.4 μmol) in MeOH (149 μL), and the mixture was stirred at 60 °C for 2 h. CHCl<sub>3</sub> was added, and the mixture was washed with water, dried over Na<sub>2</sub>SO<sub>4</sub>, and concentrated. Purification by silica gel column chromatography (CHCl<sub>3</sub>) and recrystallization from CHCl<sub>3</sub>/MeOH gave **2a** as a purple solid (8.89 mg, 6.03 μmol, 81%).

Compounds **2b–d** were synthesized according to a method similar to the synthesis of **2a**.

### Synthesis of 8a

A solution of **6a** (287 mg, 470 μmol) and pyrrole (65.0 μL, 940 μmol) in dry CH<sub>2</sub>Cl<sub>2</sub> (94.0 mL) was bubbled with Ar for 20 min, and TFA (36.0 μL, 470 μmol) was added. The mixture was stirred at room temperature for 1 h in the dark. Et<sub>3</sub>N (130 μL, 940 μmol) and DDQ (320 mg, 1.41 mmol) were added, and the mixture was stirred for 1 h. After the solvents were evaporated, purification by silica gel column chromatography (CHCl<sub>3</sub>) and recrystallization from CHCl<sub>3</sub>/MeOH gave **8a** as a purple solid (20.0 mg, 14.2 μmol, 6.0%).

### Synthesis of 9a

To a solution of **8a** (9.30 mg, 6.59  $\mu\text{mol}$ ) in  $\text{CHCl}_3$  (920  $\mu\text{L}$ ) was added a solution of  $\text{Zn}(\text{OAc})_2 \cdot 2\text{H}_2\text{O}$  (14.5 mg, 65.9  $\mu\text{mol}$ ) in MeOH (130  $\mu\text{L}$ ), and the mixture was stirred at 60  $^\circ\text{C}$  for 3 h.  $\text{CHCl}_3$  was added, and the mixture was washed with water, dried over  $\text{Na}_2\text{SO}_4$ , and concentrated. Purification by silica gel column chromatography ( $\text{CHCl}_3$ ) and recrystallization from  $\text{CHCl}_3/\text{MeOH}$  gave **9a** as a purple solid (8.08 mg, 5.48  $\mu\text{mol}$ , 83%).

Compounds **9b–d** were synthesized according to a method similar to the synthesis of **9a**.

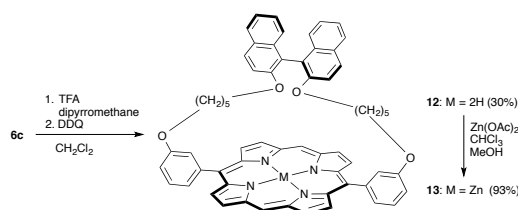

**Scheme S2** Synthesis of singly strapped porphyrins **12** and **13**

### Synthesis of 12

A solution of **6c** (279 mg, 418  $\mu\text{mol}$ ) and dipyrromethane (122 mg, 837  $\mu\text{mol}$ ) in dry  $\text{CH}_2\text{Cl}_2$  (84.0 mL) was bubbled with Ar for 20 min, and TFA (32.0  $\mu\text{L}$ , 418  $\mu\text{mol}$ ) was added. The mixture was stirred at room temperature for 7.5 h in the dark. DDQ (380 mg, 1.67 mmol) was added, and the mixture was stirred for 12 h.  $\text{Et}_3\text{N}$  (116  $\mu\text{L}$ , 837  $\mu\text{mol}$ ) was added, and the mixture was stirred for 1 h. After the solvents were evaporated, purification by silica gel column chromatography ( $\text{CHCl}_3$ ) and recrystallization from  $\text{CHCl}_3/\text{MeOH}$  gave **12** as purple solid (113 mg, 124  $\mu\text{mol}$ , 30%).

### Synthesis of 13

To a solution of **12** (56.6 mg, 61.7  $\mu\text{mol}$ ) in  $\text{CHCl}_3$  (8.60 mL) was added a solution of  $\text{Zn}(\text{OAc})_2 \cdot 2\text{H}_2\text{O}$  (136 mg, 617  $\mu\text{mol}$ ) in MeOH (1.30 mL), and the mixture was stirred at room temperature for 24 h.  $\text{CHCl}_3$  was added, and the mixture was washed with water, dried over  $\text{Na}_2\text{SO}_4$ , and concentrated. Purification by silica gel column chromatography ( $\text{CHCl}_3$ ) and recrystallization from  $\text{CHCl}_3/\text{MeOH}$  gave **13** as a purple solid (56.3 mg, 57.4  $\mu\text{mol}$ , 93%).

### Compound data for 4a

Pale yellow oil, 7.05 g, 68% yield;  $^1\text{H}$  NMR ( $\text{CDCl}_3$ , 400 MHz)  $\delta$  = 2.32 (quin,  $J$  = 6.2 Hz, 2H,  $\text{CH}_2$ ), 3.60 (t,  $J$  = 6.5 Hz, 2H,  $\text{CH}_2$ ), 4.03 (t,  $J$  = 6.9 Hz, 2H,  $\text{CH}_2$ ), 4.08–4.17 (m, 4H,  $\text{CH}_2$ ), 5.79 (s, 1H, CH), 6.91 (dd,  $J$  = 2.6, 8.2 Hz, 1H, Ph), 7.04 (d,  $J$  = 2.3 Hz, 1H, Ph), 7.07 (d,  $J$  = 7.6 Hz, 1H, Ph), 7.29 ppm (t,  $J$  = 7.9 Hz, 1H, Ph);  $^{13}\text{C}$  NMR ( $\text{CDCl}_3$ , 100 MHz)  $\delta$  = 30.1, 32.5, 65.41, 65.42, 103.6, 112.3, 115.7, 119.2, 129.7, 139.7, 158.9 ppm; IR (neat) 2953, 2884, 1605, 1491, 1458, 1389, 1319, 1267, 1213, 1182, 1099, 1034, 945, 870, 783, 721, 694, 654, 602, 561  $\text{cm}^{-1}$ ; HRMS (APCI) calcd for  $\text{C}_{12}\text{H}_{16}\text{O}_3\text{Br}$  287.0277, found 287.0268 ( $[\text{M}+\text{H}]^+$ ).

### Compound data for 5a

Pale yellow oil, 2.19 g, 87% yield;  $^1\text{H}$  NMR ( $\text{CDCl}_3$ , 400 MHz)  $\delta$  = 1.75–1.86 (m, 4H,  $\text{CH}_2$ ), 3.37–3.46 (m, 4H,  $\text{CH}_2$ ), 4.01–4.08 (m, 8H,  $\text{CH}_2$ ), 4.11–4.14 (m, 4H,  $\text{CH}_2$ ), 5.77 (s, 2H, CH), 6.50 (dd,  $J$  = 2.5, 8.2 Hz, 2H, Ph), 6.77



(s, 2H, Ph), 7.03 (d,  $J = 7.6$  Hz, 2H, Ph), 7.15 (d,  $J = 3.6$  Hz, 4H, Np), 7.21 (t,  $J = 7.9$  Hz, 2H, Ph), 7.27–7.31 (m, 2H, Np), 7.39 (d,  $J = 9.0$  Hz, 2H, Np), 7.84 (d,  $J = 8.2$  Hz, 2H, Np), 7.90 ppm (d,  $J = 9.0$  Hz, 2H, Np);  $^{13}\text{C}$  NMR ( $\text{CDCl}_3$ , 100 MHz)  $\delta = 29.3, 64.1, 65.4, 66.1, 103.8, 112.6, 115.2, 115.8, 118.6, 120.7, 123.8, 125.4, 126.4, 128.0, 129.39, 129.43, 134.2, 139.3, 154.1, 158.9$  ppm; IR (neat) 3055, 2926, 2886, 1732, 1593, 1506, 1456, 1395, 1269, 1182, 1086, 945, 864, 810, 775, 750, 723, 694  $\text{cm}^{-1}$ ; HRMS (ESI) calcd for  $\text{C}_{44}\text{H}_{42}\text{O}_8\text{Na}$  721.2772, found 721.2779 ( $[\text{M}+\text{Na}]^+$ ).

#### Compound data for 6a

Pale yellow oil, 1.58 g, 96% yield;  $^1\text{H}$  NMR ( $\text{CDCl}_3$ , 400 MHz)  $\delta = 1.80\text{--}1.86$  (m, 4H,  $\text{CH}_2$ ), 3.32–3.46 (m, 4H,  $\text{CH}_2$ ), 4.02–4.12 (m, 4H,  $\text{CH}_2$ ), 6.78–6.81 (m, 2H, Ph), 7.01–7.02 (m, 2H, Ph), 7.10–7.13 (m, 4H, Np), 7.21–7.26 (m, 2H, Np), 7.35 (t,  $J = 7.8$  Hz, 2H, Ph), 7.39–7.43 (m, 2H for Np and 2H for Ph), 7.81 (d,  $J = 8.2$  Hz, 2H, Np), 7.91 (d,  $J = 9.0$  Hz, 2H, Np), 9.95 ppm (s, 2H, CHO);  $^{13}\text{C}$  NMR ( $\text{CDCl}_3$ , 100 MHz)  $\delta = 29.2, 64.3, 66.0, 113.2, 115.8, 120.8, 121.8, 123.1, 123.9, 125.4, 126.5, 128.0, 129.5, 129.6, 129.9, 134.1, 137.7, 154.1, 159.4, 192.4$  ppm; IR (neat) 3057, 2957, 2880, 2729, 1682, 1622, 1593, 1506, 1456, 1387, 1260, 1169, 1148, 1061, 1015, 866, 783, 754, 683, 648  $\text{cm}^{-1}$ ; HRMS (ESI) calcd for  $\text{C}_{40}\text{H}_{34}\text{O}_6\text{Na}$  633.2248, found 633.2238 ( $[\text{M}+\text{Na}]^+$ ).

#### Compound data for 7a

Brownish solid, 728 mg, 54% yield;  $^1\text{H}$  NMR ( $\text{CDCl}_3$ , 400 MHz)  $\delta = 1.71\text{--}1.76$  (m, 4H,  $\text{CH}_2$ ), 3.32–3.41 (m, 4H,  $\text{CH}_2$ ), 3.93–4.02 (m, 4H,  $\text{CH}_2$ ), 5.36 (s, 2H, CH), 5.93 (s, 4H, pyrrole- $\beta$ ), 6.14–6.16 (m, 4H, pyrrole- $\beta$ ), 6.39 (dd,  $J = 2.2, 8.2$  Hz, 2H, Ph), 6.54 (t,  $J = 1.9$  Hz, 2H, Ph), 6.64–6.66 (m, 4H, pyrrole- $\alpha$ ), 6.76 (d,  $J = 7.7$  Hz, 2H, Ph), 7.10–7.17 (m, 4H for Np and 2H for Ph), 7.25–7.31 (m, 4H, Np), 7.81 (d,  $J = 8.1$  Hz, 2H, Np), 7.84 (d,  $J = 9.1$  Hz, 2H, Np), 7.90 ppm (s, 4H, NH);  $^{13}\text{C}$  NMR ( $\text{CDCl}_3$ , 100 MHz)  $\delta = 29.3, 44.1, 64.1, 66.1, 107.28, 107.30, 108.6, 112.5, 115.1, 115.8, 117.31, 117.33, 120.72, 120.73, 123.8, 125.5, 126.4, 128.0, 129.4, 129.5, 129.6, 132.4, 132.5, 134.2, 143.6, 154.1, 159.1$  ppm; IR (KBr) 3406, 3100, 3055, 2934, 2878, 1697, 1647, 1593, 1506, 1489, 1458, 1400, 1354, 1331, 1261, 1148, 1088, 1061, 1028, 883, 810, 756, 721  $\text{cm}^{-1}$ ; HRMS (ESI) calcd for  $\text{C}_{56}\text{H}_{50}\text{N}_4\text{O}_4\text{Na}$  865.3724, found 865.3758 ( $[\text{M}+\text{Na}]^+$ ).

#### Compound data for 1a

Purple solid, 29.5 mg, 1.7% yield;  $^1\text{H}$  NMR ( $\text{CDCl}_3$ , 400 MHz)  $\delta = 0.01$  (s, 2H, NH), 1.31–1.39 (m, 4H,  $\text{CH}_2$ ), 1.54 (m, 4H,  $\text{CH}_2$ ), 3.16 (m, 4H,  $\text{CH}_2$ ), 3.32–3.38 (m, 8H,  $\text{CH}_2$ ), 3.41–3.49 (m, 4H,  $\text{CH}_2$ ), 5.06 (d,  $J = 9.0$  Hz, 4H, Np), 5.53 (d,  $J = 9.1$  Hz, 4H, Np), 5.61 (s, 4H, Ph), 6.22 (d,  $J = 8.0$  Hz, 4H, Np), 6.55 (d,  $J = 8.3$  Hz, 4H, Np), 6.83 (t,  $J = 7.6$  Hz, 4H, Np), 6.89 (t,  $J = 7.3$  Hz, 4H, Np), 7.05 (dd,  $J = 2.4, 8.2$  Hz, 4H, Ph), 7.77 (t,  $J = 7.9$  Hz, 4H, Ph), 8.63 (d,  $J = 7.3$  Hz, 4H, Ph), 8.98 (s, 4H,  $\beta$ ), 9.00 ppm (s, 4H,  $\beta$ );  $^{13}\text{C}$  NMR ( $\text{CDCl}_3$ , 100 MHz)  $\delta = 27.8, 65.1, 65.5, 112.7, 116.8, 118.6, 118.8, 120.1, 122.1, 123.1, 125.0, 125.7, 127.4, 128.0, 128.2, 128.8, 130.3, 133.2, 134.0, 142.1, 152.2, 156.6$  ppm; UV/Vis (1,4-dioxane):  $\lambda_{\text{max}}$  ( $\log \epsilon$ ) = 230 (5.08), 430 (4.97), 529 (3.73), 568 (3.52), 601 (3.57), 654 nm (3.46); IR (KBr) 3283, 3057, 2957, 2930, 1595, 1506, 1491, 1427, 1339, 1229, 1146, 1045, 989, 924, 791, 748, 716  $\text{cm}^{-1}$ ; HRMS (APCI) calcd for  $\text{C}_{96}\text{H}_{75}\text{N}_4\text{O}_8$  1412.5612, found 1412.5656 ( $[\text{M}+\text{H}]^+$ ).

#### Compound data for 2a

Purple solid, 8.89 mg, 81% yield;  $^1\text{H}$  NMR ( $\text{CDCl}_3$ , 400 MHz)  $\delta = 1.21\text{--}1.26$  (m, 4H,  $\text{CH}_2$ ), 1.44–1.48 (m, 4H,

CH<sub>2</sub>), 3.21–3.32 (m, 12H, CH<sub>2</sub>), 3.44 (m, 4H, CH<sub>2</sub>), 5.56 (d, *J* = 9.1 Hz, 4H, Np), 5.60 (d, *J* = 9.1 Hz, 4H, Np), 5.65 (s, 4H, Ph), 6.61 (d, *J* = 8.5 Hz, 4H, Np), 6.75 (d, *J* = 8.1 Hz, 4H, Np), 6.87 (t, *J* = 7.5 Hz, 4H, Np), 6.97 (t, *J* = 7.3 Hz, 4H, Np), 7.06 (dd, *J* = 2.2, 8.0 Hz, 4H, Ph), 7.79 (t, *J* = 7.9 Hz, 4H, Ph), 8.64 (d, *J* = 7.4 Hz, 4H, Ph), 9.05 (s, 4H, β), 9.08 ppm (s, 4H, β); <sup>13</sup>C NMR (CDCl<sub>3</sub>, 100 MHz) δ = 27.8, 65.4, 65.6, 112.5, 116.5, 118.0, 120.2, 120.6, 121.9, 123.1, 125.1, 125.7, 127.4, 128.0, 128.7, 132.6, 132.88, 132.93, 143.0, 147.6, 147.9, 152.3, 156.1 ppm; UV/Vis (1,4-dioxane): λ<sub>max</sub> (log ε) = 230 (4.77), 439 (4.60), 573 (3.38), 618 nm (3.20); IR (KBr) 3057, 2928, 2855, 1622, 1595, 1506, 1489, 1472, 1458, 1319, 1263, 1148, 1130, 1059, 1011, 806, 789, 748 cm<sup>-1</sup>; HRMS (APCI) calcd for C<sub>9</sub>H<sub>72</sub>N<sub>4</sub>O<sub>8</sub>Zn 1474.4624, found 1474.4658 ([M]<sup>-</sup>).

#### Compound data for 8a

Purple solid, 20.0 mg, 6.0% yield; <sup>1</sup>H NMR (CDCl<sub>3</sub>, 400 MHz) δ = -2.38 (s, 2H, NH), 1.84 (s, 4H, CH<sub>2</sub>), 2.05 (s, 4H, CH<sub>2</sub>), 3.22 (s, 2H, CH<sub>2</sub>), 3.76–4.08 (m, 12H, CH<sub>2</sub>), 4.32 (s, 2H, CH<sub>2</sub>), 5.59 (s, 2H, Np or Ph), 6.26 (s, 2H, Np or Ph), 6.56 (s, 2H, Np or Ph), 6.90–7.34 (m, 18H, Np or Ph), 7.52–8.18 (m, 16H, Np or Ph), 8.77 (s, 4H, β), 9.06–9.20 (m, 4H, β); <sup>13</sup>C NMR (CDCl<sub>3</sub>, 100 MHz) δ = 30.1, 64.9, 66.6, 68.4, 68.7, 117.1, 117.6, 117.9, 118.2, 120.6, 120.7, 121.7, 122.4, 122.6, 123.8, 124.2, 125.4, 125.7, 126.0, 126.4, 127.6, 128.0, 129.0, 129.8, 130.2, 132.6, 134.2, 143.7, 154.9, 157.4 ppm; UV/Vis (1,4-dioxane): λ<sub>max</sub> (log ε) = 229 (5.40), 421 (5.63), 516 (4.26), 550 (3.93), 592 (3.75), 647 nm (3.57); IR (KBr) 3314, 3055, 2953, 2878, 1595, 1470, 1429, 1352, 1261, 1238, 1211, 1182, 1159, 1082, 1053, 804, 750 cm<sup>-1</sup>; HRMS (APCI) calcd for C<sub>9</sub>H<sub>74</sub>N<sub>4</sub>O<sub>8</sub> 1411.5545, found 1411.5501 ([M]<sup>-</sup>).

#### Compound data for 9a

Purple solid, 8.08 mg, 83% yield; <sup>1</sup>H NMR (CDCl<sub>3</sub>, 400 MHz) δ = 1.41–1.64 (m, 8H, CH<sub>2</sub>), 3.66–4.07 (m, 16H, CH<sub>2</sub>), 6.63–7.10 (m, 14H, Np or Ph), 7.29–7.43 (m, 10H, Np or Ph), 7.62–8.03 (m, 16H, Np or Ph), 9.06–9.18 (m, 8H, β); <sup>13</sup>C NMR (CDCl<sub>3</sub>, 100 MHz) δ = 22.4, 22.5, 22.6, 28.5, 28.7, 29.1, 29.2, 67.9, 68.7, 70.2, 70.6, 114.9, 115.9, 116.3, 116.4, 117.2, 121.2, 121.5, 121.6, 122.2, 123.4, 123.7, 125.6, 125.7, 125.9, 126.2, 127.2, 127.4, 127.5, 127.68, 127.73, 128.0, 128.9, 129.4, 129.7, 132.2, 132.36, 132.41, 134.3, 134.5, 144.3, 144.4, 150.7, 150.8, 154.9, 157.4, 154.8, 157.7 ppm; UV/Vis (1,4-dioxane): λ<sub>max</sub> (log ε) = 229 (5.43), 427 (5.73), 557 (4.34), 597 nm (3.92); IR (KBr) 3055, 2953, 2926, 2878, 1595, 1506, 1473, 1458, 1337, 1260, 1209, 1184, 1159, 1082, 1053, 1001, 799, 748, 721 cm<sup>-1</sup>; HRMS (APCI) calcd for C<sub>9</sub>H<sub>72</sub>N<sub>4</sub>O<sub>8</sub>Zn 1474.4664, found 1474.4631 ([M]<sup>-</sup>).

#### Compound data for 4b

Yellow oil, 3.49 g, 74% yield; <sup>1</sup>H NMR (CDCl<sub>3</sub>, 400 MHz) δ = 1.94 (m, 2H, CH<sub>2</sub>), 2.07 (m, 2H, CH<sub>2</sub>), 3.49 (t, *J* = 6.6 Hz, 2H, CH<sub>2</sub>), 4.01 (t, *J* = 6.2 Hz, 2H, CH<sub>2</sub>), 4.03–4.16 (m, 4H, CH<sub>2</sub>), 5.79 (s, 1H, CH), 6.89 (dd, *J* = 2.6, 8.2 Hz, 1H, Ph), 7.02 (s, 1H, Ph), 7.06 (d, *J* = 7.6 Hz, 1H, Ph), 7.29 ppm (t, *J* = 7.9 Hz, 1H, Ph); <sup>13</sup>C NMR (CDCl<sub>3</sub>, 100 MHz) δ = 28.0, 29.6, 33.6, 65.4, 66.9, 103.7, 112.1, 115.7, 119.0, 129.6, 139.6, 159.1 ppm; IR (neat) 3042, 2953, 2884, 2754, 1605, 1489, 1456, 1395, 1317, 1254, 1182, 1159, 1072, 961, 874, 781, 721, 694, 646, 559 cm<sup>-1</sup>; HRMS (APCI) calcd for C<sub>13</sub>H<sub>18</sub>O<sub>3</sub>Br 301.0434, found 301.0447 ([M+H]<sup>+</sup>).

#### Compound data for 5b

Yellow oil, 6.34 g, 94% yield; <sup>1</sup>H NMR (CDCl<sub>3</sub>, 400 MHz) δ = 1.24–1.40 (m, 4H, CH<sub>2</sub>), 1.50–1.64 (m, 4H, CH<sub>2</sub>),

3.52 (t,  $J = 6.3$  Hz, 4H, CH<sub>2</sub>), 3.91–3.99 (m, 2H, CH<sub>2</sub>), 4.01–4.08 (m, 6H, CH<sub>2</sub>), 4.10–4.16 (m, 4H, CH<sub>2</sub>), 5.78 (s, 2H, CH), 6.72 (dd,  $J = 2.5, 8.2$  Hz, 2H, Ph), 6.89 (s, 2H, Ph), 7.03 (d,  $J = 7.6$  Hz, 2H, Np), 7.18–7.25 (m, 2H for Np and 4H for Ph), 7.27–7.34 (m, 2H, Np), 7.41 (d,  $J = 9.0$  Hz, 2H, Np), 7.85 (d,  $J = 8.1$  Hz, 2H, Np), 7.92 ppm (d,  $J = 9.1$  Hz, 2H, Np); <sup>13</sup>C NMR (CDCl<sub>3</sub>, 100 MHz)  $\delta = 25.4, 25.9, 65.4, 67.1, 69.4, 103.7, 112.3, 115.5, 116.2, 118.6, 120.9, 123.7, 125.6, 126.3, 128.0, 129.4, 129.46, 129.49, 134.2, 139.4, 154.5, 159.2$  ppm; IR (neat) 3055, 2953, 2878, 2758, 1738, 1732, 1614, 1593, 1504, 1393, 1227, 1180, 1148, 1036, 945, 864, 808, 779, 750, 721, 694, 608 cm<sup>-1</sup>; HRMS (ESI) calcd for C<sub>46</sub>H<sub>47</sub>O<sub>8</sub> 727.3265, found 727.3293 ([M+H]<sup>+</sup>).

#### Compound data for 6b

Yellow oil, 5.53 g, 99% yield; <sup>1</sup>H NMR (CDCl<sub>3</sub>, 400 MHz)  $\delta = 1.24$ – $1.38$  (m, 4H, CH<sub>2</sub>),  $1.50$ – $1.64$  (m, 4H, CH<sub>2</sub>), 3.49 (t,  $J = 6.3$  Hz, 4H, CH<sub>2</sub>), 3.94 (m, 2H, CH<sub>2</sub>), 4.06 (m, 2H, CH<sub>2</sub>), 6.98 (m, 2H, Ph), 7.16–7.24 (m, 4H for Np and 2H for Ph), 7.31 (m, 2H, Ph), 7.36–7.43 (m, 4H for Np and 2H for Ph), 7.83 (d,  $J = 8.2$  Hz, 2H, Np), 7.91 (d,  $J = 8.9$  Hz, 2H, Np), 9.95 ppm (s, 2H, CHO); <sup>13</sup>C NMR (CDCl<sub>3</sub>, 100 MHz)  $\delta = 25.3, 25.8, 67.3, 69.4, 112.8, 116.1, 120.9, 121.9, 123.3, 123.8, 125.5, 126.3, 128.0, 129.4, 129.5, 130.0, 134.2, 137.8, 154.5, 159.6, 192.3$  ppm; IR (neat) 3057, 2947, 2874, 2729, 1699, 1593, 1504, 1485, 1454, 1387, 1331, 1219, 1169, 1148, 1086, 1018, 864, 808, 746, 683, 648, 592 cm<sup>-1</sup>; HRMS (ESI) calcd for C<sub>42</sub>H<sub>38</sub>O<sub>6</sub>Na 661.2561, found 661.2591 ([M+Na]<sup>+</sup>).

#### Compound data for 7b

Brownish solid, 731 mg, 53% yield; <sup>1</sup>H NMR (CDCl<sub>3</sub>, 400 MHz)  $\delta = 1.27$  (m, 4H, CH<sub>2</sub>),  $1.48$ – $1.53$  (m, 4H, CH<sub>2</sub>), 3.43 (t,  $J = 6.3$  Hz, 4H, CH<sub>2</sub>), 3.87–4.02 (m, 4H, CH<sub>2</sub>), 5.38 (s, 2H, CH), 5.92 (s, 4H, pyrrole- $\beta$ ), 6.13–6.15 (m, 4H, pyrrole- $\beta$ ), 6.57–6.66 (m, 4H for pyrrole- $\alpha$  and 4H for Ph), 6.76 (d,  $J = 7.7$  Hz, 2H, Ph), 7.13–7.20 (m, 4H for Np and 2H for Ph), 7.28–7.29 (m, 2H, Np), 7.36 (d,  $J = 9.0$  Hz, 2H, Np), 7.81 (d,  $J = 8.2$  Hz, 2H, Np), 7.88 (d,  $J = 8.9$  Hz, 2H, Np), 7.89 (s, 4H, NH); <sup>13</sup>C NMR (CDCl<sub>3</sub>, 100 MHz)  $\delta = 25.4, 25.9, 44.1, 67.1, 69.4, 107.3, 108.6, 112.8, 115.0, 116.1, 117.3, 120.7, 120.9, 123.7, 125.6, 126.3, 128.0, 129.4, 129.5, 129.7, 132.5, 134.3, 143.6, 154.5, 159.4$  ppm; IR (KBr) 3395, 3100, 3055, 2936, 2874, 1701, 1593, 1508, 1489, 1472, 1431, 1398, 1354, 1331, 1261, 1148, 1115, 1088, 1028, 883, 810, 756, 721 cm<sup>-1</sup>; HRMS (ESI) calcd for C<sub>58</sub>H<sub>54</sub>N<sub>4</sub>O<sub>4</sub>Na 893.4037, found 893.4033 ([M+Na]<sup>+</sup>).

#### Compound data for 1b

Purple solid, 18.7 mg, 2.5% yield; <sup>1</sup>H NMR (CDCl<sub>3</sub>, 400 MHz)  $\delta = -1.41$  (s, 2H, NH),  $0.67$ – $0.81$  (m, 8H, CH<sub>2</sub>),  $1.12$  (m, 8H, CH<sub>2</sub>),  $3.13$  (m, 4H, CH<sub>2</sub>),  $3.22$  (m, 4H, CH<sub>2</sub>),  $3.53$  (m, 8H, CH<sub>2</sub>),  $6.09$  (d,  $J = 9.1$  Hz, 4H, Np),  $6.18$  (s, 4H, Ph),  $6.45$  (d,  $J = 9.1$  Hz, 4H, Np),  $6.69$  (d,  $J = 8.4$  Hz, 4H Np),  $6.90$  (t,  $J = 7.2$  Hz, 4H, Np),  $6.97$  (t,  $J = 7.4$  Hz, 4H, Np),  $7.09$  (d,  $J = 7.8$  Hz, 4H, Np),  $7.15$  (dd,  $J = 2.2, 8.5$  Hz, 4H, Ph),  $7.77$  (t,  $J = 7.9$  Hz, 4H, Ph),  $8.50$  (d,  $J = 7.3$  Hz, 4H, Ph),  $8.84$  (s, 4H,  $\beta$ ),  $8.89$  ppm (s, 4H,  $\beta$ ); <sup>13</sup>C NMR (CDCl<sub>3</sub>, 100 MHz)  $\delta = 24.4, 25.0, 68.3, 68.4, 113.8, 117.2, 119.19, 119.20, 120.4, 123.1, 123.9, 125.3, 125.7, 127.6, 128.5, 128.7, 130.7, 132.9, 133.7, 142.8, 153.3, 156.8$  ppm; UV/Vis (1,4-dioxane):  $\lambda_{\max}$  (log $\epsilon$ ) = 231 (5.32), 423 (5.48), 520 (4.12), 555 (3.75), 595 (3.66), 648 nm (3.35); IR (KBr) 3300, 3057, 2953, 2876, 1620, 1595, 1506, 1491, 1472, 1458, 1427, 1352, 1337, 1260, 1252, 1219, 1078, 1047, 1016, 995, 795, 748, 716 cm<sup>-1</sup>; HRMS (ESI) calcd for C<sub>100</sub>H<sub>82</sub>N<sub>4</sub>O<sub>8</sub>Na 1490.6058, found 1490.6009 ([M+Na]<sup>+</sup>).

### Compound data for 2b

Purple solid, 5.8 mg, 98% yield;  $^1\text{H}$  NMR ( $\text{CDCl}_3$ , 400 MHz)  $\delta$  = 0.53 (m, 4H,  $\text{CH}_2$ ), 0.74 (m, 4H,  $\text{CH}_2$ ), 1.13–1.23 (m, 8H,  $\text{CH}_2$ ), 3.02 (m, 4H,  $\text{CH}_2$ ), 3.24 (m, 4H,  $\text{CH}_2$ ), 3.55 (m, 4H,  $\text{CH}_2$ ), 3.69 (m, 4H,  $\text{CH}_2$ ), 6.29 (s, 4H, Ph), 6.31 (d,  $J$  = 9.2 Hz, 4H, Np), 6.73 (d,  $J$  = 8.5 Hz, 4H, Np), 6.88 (d,  $J$  = 9.0 Hz, 4H, Np), 6.93 (t,  $J$  = 7.6 Hz, 4H, Np), 7.03 (t,  $J$  = 7.3 Hz, 4H, Np), 7.16 (dd,  $J$  = 2.1, 8.4 Hz, 4H, Np), 7.33 (d,  $J$  = 8.1 Hz, 4H, Ph), 7.76 (t,  $J$  = 7.9 Hz, 4H, Ph), 8.45 (d,  $J$  = 7.4 Hz, 4H, Ph), 8.87 (s, 4H,  $\beta$ ), 8.97 ppm (s, 4H,  $\beta$ );  $^{13}\text{C}$  NMR ( $\text{CDCl}_3$ , 100 MHz)  $\delta$  = 23.9, 24.7, 68.1, 113.2, 116.9, 118.5, 119.9, 120.6, 123.3, 124.2, 125.3, 125.9, 127.8, 128.5, 128.7, 128.9, 132.3, 132.6, 133.5, 143.9, 149.0, 149.1, 153.1, 156.2 ppm; UV/Vis (1,4-dioxane):  $\lambda_{\text{max}}$  ( $\log \epsilon$ ) = 230 (5.14), 430 (5.17), 562 (3.86), 603 nm (3.47); IR (KBr) 3057, 2953, 2874, 1653, 1622, 1595, 1506, 1476, 1427, 1323, 1261, 1240, 1215, 1148, 1057, 1003, 866, 793, 748, 719  $\text{cm}^{-1}$ ; HRMS (ESI) calcd for  $\text{C}_{100}\text{H}_{80}\text{N}_4\text{O}_8\text{ZnCl}$  1565.5019, found 1565.5023 ( $[\text{M}+\text{Cl}]^-$ ).

### Compound data for 8b

Purple solid, 21.0 mg, 6.0% yield;  $^1\text{H}$  NMR ( $\text{CDCl}_3$ , 400 MHz)  $\delta$  = -2.38 (s, 2H, NH), 1.39–1.86 (m, 16H,  $\text{CH}_2$ ), 3.40–3.65 (m, 4H,  $\text{CH}_2$ ), 3.84–4.20 (m, 12H,  $\text{CH}_2$ ), 6.31–7.23 (m, 12H, Np or Ph), 7.29–7.65 (m, 12H, Np or Ph), 7.76–8.10 (m, 16H, Np or Ph), 8.91 (s, 4H,  $\beta$ ), 9.10 (s, 4H,  $\beta$ );  $^{13}\text{C}$  NMR ( $\text{CDCl}_3$ , 100 MHz)  $\delta$  = 25.3, 25.9, 26.5, 67.9, 68.1, 69.4, 70.0, 116.0, 116.3, 120.8, 121.1, 121.4, 122.8, 123.4, 123.7, 125.6, 126.1, 127.5, 127.8, 128.0, 129.0, 129.4, 129.5, 129.7, 130.4, 132.4, 134.2, 134.4, 143.7, 154.2, 154.7, 157.4, 157.5 ppm; UV/Vis (1,4-dioxane):  $\lambda_{\text{max}}$  ( $\log \epsilon$ ) = 231 (5.41), 420 (5.64), 515 (4.30), 551 (3.93), 592 (3.75), 647 nm (3.56); IR (KBr) 3314, 3057, 2943, 2874, 1595, 1508, 1472, 1429, 1352, 1317, 1261, 1242, 1207, 1180, 1148, 1084, 1045, 1018, 997, 804, 777, 748  $\text{cm}^{-1}$ ; HRMS (APCI) calcd for  $\text{C}_{100}\text{H}_{82}\text{N}_4\text{O}_8$  1467.6171, found 1467.6118 ( $[\text{M}]^-$ ).

### Compound data for 9b

Purple solid, 8.3 mg, 89% yield;  $^1\text{H}$  NMR ( $\text{CDCl}_3$ , 400 MHz)  $\delta$  = 1.30–1.71 (m, 16H,  $\text{CH}_2$ ), 3.42–3.51 (m, 4H,  $\text{CH}_2$ ), 3.84–4.13 (m, 12H,  $\text{CH}_2$ ), 5.73–6.72 (m, 4H, Np or Ph), 6.92–7.10 (m, 8H, Np or Ph), 7.23–7.50 (m, 12H, Np or Ph), 7.60–8.09 (m, 16H, Np or Ph), 9.04–9.21 (m, 8H,  $\beta$ );  $^{13}\text{C}$  NMR ( $\text{CDCl}_3$ , 100 MHz)  $\delta$  = 25.2, 25.6, 25.9, 26.0, 29.9, 67.8, 68.0, 69.4, 70.1, 115.6, 115.8, 116.2, 121.1, 121.8, 122.5, 123.4, 123.7, 125.5, 125.6, 126.0, 126.2, 127.5, 127.6, 128.0, 128.9, 129.5, 129.7, 132.1, 132.4, 132.5, 134.4, 144.2, 144.4, 150.7, 150.8, 154.7, 157.1, 157.4 ppm; UV/Vis (1,4-dioxane):  $\lambda_{\text{max}}$  ( $\log \epsilon$ ) = 232 (5.31), 426 (5.63), 556 (4.21), 596 nm (3.75); IR (KBr) 3055, 2943, 2874, 1595, 1506, 1474, 1458, 1431, 1354, 1337, 1261, 1209, 1182, 1159, 1148, 1082, 1069, 1045, 999, 799, 748  $\text{cm}^{-1}$ ; HRMS (APCI) calcd for  $\text{C}_{100}\text{H}_{80}\text{N}_4\text{O}_8\text{Zn}$  1530.5292, found 1530.5278 ( $[\text{M}]^-$ ).

### Compound data for 4c

Yellow oil, 3.76 g, 74% yield;  $^1\text{H}$  NMR ( $\text{CDCl}_3$ , 400 MHz)  $\delta$  = 1.61 (m, 2H,  $\text{CH}_2$ ), 1.81 (m, 2H,  $\text{CH}_2$ ), 1.93 (m, 2H,  $\text{CH}_2$ ), 3.43 (t,  $J$  = 6.7 Hz, 2H,  $\text{CH}_2$ ), 3.98 (t,  $J$  = 6.3 Hz, 2H,  $\text{CH}_2$ ), 4.00–4.15 (m, 4H,  $\text{CH}_2$ ), 5.78 (s, 1H, CH), 6.89 (dd,  $J$  = 2.3, 7.9 Hz, 1H, Ph), 7.02 (s, 1H, Ph), 7.03 (d,  $J$  = 6.5 Hz, 1H, Ph), 7.28 ppm (t,  $J$  = 7.9 Hz, 1H, Ph);  $^{13}\text{C}$  NMR ( $\text{CDCl}_3$ , 100 MHz)  $\delta$  = 24.9, 28.5, 32.5, 33.7, 65.3, 67.6, 103.6, 112.1, 115.6, 118.8, 129.5, 139.5, 159.1 ppm; IR (neat) 3040, 2943, 2884, 2754, 1605, 1587 1491, 1456, 1389, 1319, 1273, 1182, 1159, 1070, 964, 874, 783, 721, 694, 642, 559  $\text{cm}^{-1}$ ; HRMS (APCI) calcd for  $\text{C}_{14}\text{H}_{20}\text{O}_3\text{Br}$  315.0590, found 315.0582 ( $[\text{M}+\text{H}]^+$ ).

### Compound data for 5c

Yellow oil, 1.11 g, 99% yield;  $^1\text{H}$  NMR ( $\text{CDCl}_3$ , 400 MHz)  $\delta$  = 0.95–1.02 (m, 4H,  $\text{CH}_2$ ), 1.38–1.49 (m, 8H,  $\text{CH}_2$ ), 3.56 (t,  $J$  = 6.5 Hz, 4H,  $\text{CH}_2$ ), 3.88–3.94 (m, 2H,  $\text{CH}_2$ ), 3.99–4.09 (m, 6H,  $\text{CH}_2$ ), 4.11–4.17 (m, 4H,  $\text{CH}_2$ ), 5.82 (s, 2H, CH), 6.82 (dd,  $J$  = 2.5, 8.2 Hz, 2H, Ph), 6.97 (s, 2H, Ph), 7.06 (d,  $J$  = 7.6 Hz, 2H, Ph), 7.16–7.22 (m, 4H, Np), 7.27–7.31 (m, 2H for Ph and 2H for Np), 7.40 (d,  $J$  = 9.0 Hz, 2H, Np), 7.82 (d,  $J$  = 8.2 Hz, 2H, Np), 7.90 ppm (d,  $J$  = 8.9 Hz, 2H, Np);  $^{13}\text{C}$  NMR ( $\text{CDCl}_3$ , 100 MHz)  $\delta$  = 22.3, 28.6, 29.1, 65.4, 67.7, 69.7, 103.7, 112.2, 115.6, 116.0, 118.6, 120.9, 123.6, 125.6, 126.2, 127.9, 129.2, 129.4, 129.5, 134.3, 139.4, 154.6, 159.3 ppm; IR (neat) 3055, 2945, 2874, 1695, 1591, 1504, 1456, 1354, 1329, 1260, 1182, 1148, 1078, 962, 876, 810, 777, 750, 721, 694  $\text{cm}^{-1}$ ; HRMS (ESI) calcd for  $\text{C}_{48}\text{H}_{50}\text{O}_8\text{Na}$  777.3398, found 777.3362 ( $[\text{M}+\text{Na}]^+$ ).

### Compound data for 6c

Yellow oil, 242 mg, 98% yield;  $^1\text{H}$  NMR ( $\text{CDCl}_3$ , 400 MHz)  $\delta$  = 0.94–1.02 (m, 4H,  $\text{CH}_2$ ), 1.36–1.53 (m, 8H,  $\text{CH}_2$ ), 3.55 (t,  $J$  = 6.5 Hz, 4H,  $\text{CH}_2$ ), 3.88–3.94 (m, 2H,  $\text{CH}_2$ ), 4.02–4.07 (m, 2H,  $\text{CH}_2$ ), 7.06–7.09 (m, 2H, Ph), 7.15–7.21 (m, 2H for Ph and 2H for Np), 7.25–7.30 (m, 2H, Np), 7.40 (d,  $J$  = 9.0 Hz, 2H, Np), 7.43–7.45 (m, 4H for Ph and 2H for Np), 7.81 (d,  $J$  = 8.1 Hz, 2H, Np), 7.90 (d,  $J$  = 8.9 Hz, 2H, Np), 9.99 ppm (s, 2H, CHO);  $^{13}\text{C}$  NMR ( $\text{CDCl}_3$ , 100 MHz)  $\delta$  = 22.3, 28.5, 29.0, 68.0, 69.7, 112.6, 115.9, 120.9, 122.1, 123.6, 123.7, 125.6, 126.3, 127.9, 129.3, 129.4, 130.1, 134.3, 137.9, 154.6, 159.8, 192.4 ppm; IR (neat) 3057, 2922, 2870, 2729, 1705, 1593, 1506, 1456, 1387, 1319, 1261, 1169, 1148, 1084, 1043, 883, 777, 748, 685, 648  $\text{cm}^{-1}$ ; HRMS (ESI) calcd for  $\text{C}_{44}\text{H}_{42}\text{O}_6\text{Na}$  689.2874, found 689.2907 ( $[\text{M}+\text{Na}]^+$ ).

### Compound data for 7c

Brownish solid, 205 mg, 46% yield;  $^1\text{H}$  NMR ( $\text{CDCl}_3$ , 400 MHz)  $\delta$  = 0.92–0.98 (m, 4H,  $\text{CH}_2$ ), 1.31–1.47 (m, 8H,  $\text{CH}_2$ ), 3.48 (t,  $J$  = 6.5 Hz, 4H,  $\text{CH}_2$ ), 3.85–3.90 (m, 2H,  $\text{CH}_2$ ), 3.97–4.01 (m, 2H,  $\text{CH}_2$ ), 5.43 (s, 2H, CH), 5.96 (s, 4H, pyrrole- $\beta$ ), 6.16–6.18 (m, 4H, pyrrole- $\beta$ ), 6.68–6.70 (m, 4H for pyrrole- $\alpha$  and 4H for Ph), 6.80 (d,  $J$  = 7.7 Hz, 2H, Ph), 7.13–7.25 (m, 6H for Np and 2H for Ph), 7.35 (d,  $J$  = 9.0 Hz, 2H, Np), 7.76 (d,  $J$  = 7.9 Hz, 2H, Np), 7.84 (d,  $J$  = 9.0 Hz, 2H, Np), 7.94 ppm (s, 4H, NH);  $^{13}\text{C}$  NMR ( $\text{CDCl}_3$ , 100 MHz)  $\delta$  = 22.4, 28.6, 29.1, 44.2, 67.7, 69.7, 107.3, 108.6, 112.9, 114.9, 116.0, 117.3, 120.7, 120.8, 123.6, 125.6, 126.3, 127.9, 129.3, 129.4, 129.7, 132.5, 134.3, 143.7, 154.6, 159.5 ppm; IR (KBr) 3374, 3098, 3055, 2934, 2868, 1724, 1593, 1508, 1489, 1468, 1458, 1431, 1398, 1354, 1317, 1261, 1148, 1088, 1028, 883, 810, 760, 719  $\text{cm}^{-1}$ ; HRMS (APCI) calcd for  $\text{C}_{60}\text{H}_{59}\text{N}_4\text{O}_4$  899.4531, found 899.4553 ( $[\text{M}+\text{H}]^+$ ).

### Compound data for 1c

Purple solid, 8.1 mg, 4.1% yield;  $^1\text{H}$  NMR ( $\text{CDCl}_3$ , 400 MHz)  $\delta$  = -1.54 (s, 2H, NH), 0.30 (m, 4H,  $\text{CH}_2$ ), 0.42 (m, 4H,  $\text{CH}_2$ ), 0.87 (m, 8H,  $\text{CH}_2$ ), 1.28 (m, 8H,  $\text{CH}_2$ ), 2.87 (m, 4H,  $\text{CH}_2$ ), 3.09 (m, 4H,  $\text{CH}_2$ ), 3.54 (m, 8H,  $\text{CH}_2$ ), 5.08 (s, 8H, Np), 6.48 (d,  $J$  = 9.1 Hz, 8H, Np), 6.63 (s, 4H, Ph), 6.76 (t,  $J$  = 7.6 Hz, 4H, Np), 6.84 (t,  $J$  = 7.5 Hz, 4H Np), 7.22 (d,  $J$  = 8.4 Hz, 4H, Ph), 7.76 (t,  $J$  = 7.9 Hz, 4H, Ph), 8.45 (d,  $J$  = 7.4 Hz, 4H, Ph), 9.02 (s, 4H,  $\beta$ ), 9.05 ppm (s, 4H,  $\beta$ );  $^{13}\text{C}$  NMR ( $\text{CDCl}_3$ , 100 MHz)  $\delta$  = 20.8, 26.9, 27.9, 67.5, 67.9, 112.8, 117.0, 118.4, 119.9, 120.1, 122.8, 125.1, 125.4, 127.2, 127.9, 128.0, 128.3, 133.1, 143.0, 153.0, 156.8 ppm; UV/Vis (1,4-dioxane):  $\lambda_{\text{max}}$  (log  $\epsilon$ ) = 230 (5.46), 422 (5.48), 518 (4.25), 553 (3.96), 592 (3.96), 647 nm (3.88); IR (KBr) 3310, 3055, 2926, 2868,

1734, 1595, 1506, 1472, 1427, 1335, 1263, 1242, 1219, 1146, 1134, 1078, 1047, 918, 864, 800, 748, 721, 698  $\text{cm}^{-1}$ ; HRMS (APCI) calcd for  $\text{C}_{104}\text{H}_{91}\text{N}_4\text{O}_8$  1524.6864, found 1524.6833 ( $[\text{M}+\text{H}]^+$ ).

#### Compound data for 2c

Purple solid, 4.6 mg, 100% yield;  $^1\text{H}$  NMR ( $\text{CDCl}_3$ , 400 MHz)  $\delta$  = 0.30 (m, 4H,  $\text{CH}_2$ ), 0.54 (m, 4H,  $\text{CH}_2$ ), 0.67 (m, 4H,  $\text{CH}_2$ ), 0.77 (m, 4H,  $\text{CH}_2$ ), 1.26–1.37 (m, 8H,  $\text{CH}_2$ ), 2.91 (m, 4H,  $\text{CH}_2$ ), 3.06 (m, 4H,  $\text{CH}_2$ ), 3.60 (m, 4H,  $\text{CH}_2$ ), 3.65 (m, 4H,  $\text{CH}_2$ ), 5.38 (d,  $J$  = 9.0 Hz, 4H, Np), 5.76 (d,  $J$  = 9.0 Hz, 4H, Np), 6.62 (d,  $J$  = 8.4 Hz, 4H, Np), 6.70 (s, 4H, Ph), 6.87 (t,  $J$  = 7.6 Hz, 4H, Np), 6.92 (d,  $J$  = 7.9 Hz, 4H, Np), 6.99 (t,  $J$  = 7.5 Hz, 4H, Np), 7.24 (dd,  $J$  = 2.4, 8.5 Hz, 4H, Ph), 7.75 (t,  $J$  = 7.9 Hz, 4H, Ph), 8.42 (d,  $J$  = 7.7 Hz, 4H, Ph), 9.04 (s, 4H,  $\beta$ ), 9.19 ppm (s, 4H,  $\beta$ );  $^{13}\text{C}$  NMR ( $\text{CDCl}_3$ , 100 MHz)  $\delta$  = 21.3, 27.3, 28.2, 68.1, 68.6, 113.8, 117.1, 119.1, 120.0, 121.3, 123.3, 125.4, 125.8, 127.6, 128.3, 128.4, 128.6, 132.6, 132.8, 133.4, 144.0, 149.9, 153.4, 156.7 ppm; UV/Vis (1,4-dioxane):  $\lambda_{\text{max}}$  ( $\log \epsilon$ ) = 230 (5.26), 429 (5.30), 559 (4.00), 596 nm (3.66); IR (KBr) 3055, 2936, 2870, 1620, 1593, 1543, 1508, 1474, 1458, 1427, 1319, 1265, 1242, 1211, 1169, 1146, 1061, 1007, 934, 868, 795, 748, 718, 702  $\text{cm}^{-1}$ ; HRMS (APCI) calcd for  $\text{C}_{100}\text{H}_{88}\text{N}_4\text{O}_8\text{Zn}$  1586.5958, found 1586.5897 ( $[\text{M}]^-$ ).

#### Compound data for 8c

Purple solid, 35.8 mg, 10% yield;  $^1\text{H}$  NMR ( $\text{CDCl}_3$ , 400 MHz)  $\delta$  = -2.60 (s, 2H, NH), 1.11–1.18 (m, 8H,  $\text{CH}_2$ ), 1.42–1.52 (m, 12H,  $\text{CH}_2$ ), 1.57–1.64 (m, 4H,  $\text{CH}_2$ ), 3.68–3.72 (m, 8H,  $\text{CH}_2$ ), 3.84–3.92 (m, 4H,  $\text{CH}_2$ ), 3.98–4.03 (m, 4H,  $\text{CH}_2$ ), 6.70–7.14 (m, 16H, Np or Ph), 7.26–7.45 (m, 8H, Np or Ph), 7.64–8.03 (m, 16H, Np or Ph), 8.94–9.06 (m, 8H,  $\beta$ );  $^{13}\text{C}$  NMR ( $\text{CDCl}_3$ , 100 MHz)  $\delta$  = 22.1, 22.4, 22.5, 28.2, 28.4, 28.5, 28.8, 29.0, 29.1, 67.6, 68.5, 70.0, 70.5, 114.5, 115.7, 116.2, 117.3, 120.4, 120.5, 120.8, 121.6, 122.1, 123.5, 123.6, 125.4, 125.5, 125.9, 126.2, 127.5, 127.8, 128.0, 129.0, 129.3, 129.4, 134.0, 134.3, 143.5, 143.6, 154.6, 154.7, 157.2, 157.6 ppm; UV/Vis (1,4-dioxane):  $\lambda_{\text{max}}$  ( $\log \epsilon$ ) = 230 (5.36), 419 (5.62), 514 (4.26), 550 (3.82), 591 (3.71), 647 nm (3.48); IR (KBr) 3314, 3055, 2941, 1595, 1576, 1558, 1541, 1506, 1489, 1472, 1458, 1429, 1352, 1339, 1317, 1263, 1242, 1180, 1163, 1084, 997, 804  $\text{cm}^{-1}$ ; HRMS (APCI) calcd for  $\text{C}_{100}\text{H}_{90}\text{N}_4\text{O}_8$  1523.6797, found 1523.6777 ( $[\text{M}]^-$ ).

#### Compound data for 9c

Purple solid, 10.4 mg, 93% yield;  $^1\text{H}$  NMR ( $\text{CDCl}_3$ , 400 MHz)  $\delta$  = 1.09–1.63 (m, 24H,  $\text{CH}_2$ ), 3.70–4.05 (m, 16H,  $\text{CH}_2$ ), 6.62–7.09 (m, 16H, Np or Ph), 7.24–7.42 (m, 8H, Np or Ph), 7.62–8.03 (m, 16H, Np or Ph), 9.06–9.16 (m, 8H,  $\beta$ );  $^{13}\text{C}$  NMR ( $\text{CDCl}_3$ , 100 MHz)  $\delta$  = 22.4, 22.6, 28.4, 28.5, 28.6, 28.7, 29.1, 29.17, 29.24, 67.9, 68.7, 70.2, 70.6, 114.9, 115.1, 115.9, 116.0, 116.3, 116.4, 117.2, 121.2, 123.4, 123.7, 125.6, 125.7, 125.9, 126.2, 127.5, 127.68, 127.73, 128.0, 128.9, 129.4, 129.7, 132.17, 132.00, 132.3, 132.35, 132.40, 144.3, 144.4, 150.7, 150.8, 154.9, 157.4 ppm; UV/Vis (1,4-dioxane):  $\lambda_{\text{max}}$  ( $\log \epsilon$ ) = 230 (5.42), 425 (5.73), 555 (4.33), 596 nm (3.84); IR (KBr) 3055, 2940, 2868, 1595, 1576, 1558, 1506, 1474, 1458, 1431, 1354, 1337, 1261, 1180, 1148, 1084, 1069, 1001, 934, 799, 748, 719, 700  $\text{cm}^{-1}$ ; HRMS (APCI)  $\text{C}_{104}\text{H}_{88}\text{N}_4\text{O}_8\text{Zn}$  1586.5920, found 1586.5920, found 1586.5931 ( $[\text{M}]^-$ ).

#### Compound data for 4d

Pale orange oil, 4.95 g, 74% yield;  $^1\text{H}$  NMR ( $\text{CDCl}_3$ , 400 MHz)  $\delta$  = 1.48–1.54 (m, 4H,  $\text{CH}_2$ ), 1.79 (m, 2H,  $\text{CH}_2$ ), 1.89 (m, 2H,  $\text{CH}_2$ ), 3.42 (t,  $J$  = 6.8 Hz, 2H,  $\text{CH}_2$ ), 3.97 (t,  $J$  = 6.4 Hz, 2H,  $\text{CH}_2$ ), 4.00–4.15 (m, 4H,  $\text{CH}_2$ ), 5.79 (s,

1H, CH), 6.89 (dd,  $J = 2.4$  Hz, 8.2 Hz, 1H, Ph), 7.02 (d,  $J = 2.3$  Hz, 1H, Ph), 7.05 (d,  $J = 7.7$  Hz, 1H, Ph), 7.28 ppm (t,  $J = 8.0$  Hz, 1H, Ph);  $^{13}\text{C}$  NMR ( $\text{CDCl}_3$ , 100 MHz)  $\delta = 25.4, 28.0, 29.1, 32.7, 33.9, 65.3, 67.8, 103.6, 112.1, 115.6, 118.7, 129.5, 139.5, 159.2$  ppm; IR (neat) 2938, 2886, 1605, 1587, 1495, 1454, 1385, 1317, 1260, 1182, 1159, 1072, 945, 874, 781, 721, 694, 644, 606, 561  $\text{cm}^{-1}$ ; HRMS (APCI) calcd for  $\text{C}_{15}\text{H}_{22}\text{O}_3\text{Br}$  329.0747, found 329.0755 ( $[\text{M}+\text{H}]^+$ ).

#### Compound data for 5d

Pale orange oil, 7.00 g, 96% yield;  $^1\text{H}$  NMR ( $\text{CDCl}_3$ , 400 MHz)  $\delta = 0.91\text{--}0.96$  (m, 4H,  $\text{CH}_2$ ), 1.10–1.14 (m, 4H,  $\text{CH}_2$ ), 1.40–1.51 (m, 8H,  $\text{CH}_2$ ), 3.77 (t,  $J = 6.6$  Hz, 4H,  $\text{CH}_2$ ), 3.90–4.05 (m, 4H,  $\text{CH}_2$ ), 4.05–4.15 (m, 8H,  $\text{CH}_2$ ), 5.81 (s, 2H, CH), 6.86–6.89 (m, 2H, Ph), 7.02–7.03 (m, 2H, Ph), 7.07 (d,  $J = 7.6$  Hz, 2H, Ph), 7.17–7.23 (m, 4H, Np), 7.28–7.35 (m, 2H for Ph and 2H for Np), 7.41 (d,  $J = 9.0$  Hz, 2H, Np), 7.84 (d,  $J = 8.2$  Hz, 2H, Np), 7.92 ppm (d,  $J = 9.0$  Hz, 2H, Np);  $^{13}\text{C}$  NMR ( $\text{CDCl}_3$ , 100 MHz)  $\delta = 25.51, 25.53, 29.1, 29.4, 65.4, 67.8, 69.8, 103.7, 112.2, 115.7, 116.1, 118.7, 120.9, 123.6, 125.6, 126.2, 127.9, 129.2, 129.4, 129.5, 134.3, 139.5, 154.6, 159.3$  ppm; IR (neat) 3055, 2941, 2872, 2758, 1732, 1591, 1506, 1456, 1387, 1354, 1275, 1180, 1065, 1018, 962, 862, 808, 779, 750, 721, 694, 608  $\text{cm}^{-1}$ ; HRMS (APCI) calcd for  $\text{C}_{50}\text{H}_{55}\text{O}_8$  783.3891, found 783.3860 ( $[\text{M}+\text{H}]^+$ ).

#### Compound data for 6d

Pale orange oil, 4.91 g, 98% yield;  $^1\text{H}$  NMR ( $\text{CDCl}_3$ , 400 MHz)  $\delta = 0.91$  (m, 4H,  $\text{CH}_2$ ), 1.11 (m, 4H,  $\text{CH}_2$ ), 1.40–1.49 (m, 8H,  $\text{CH}_2$ ), 3.78 (t,  $J = 6.6$  Hz, 4H,  $\text{CH}_2$ ), 3.90 (m, 2H,  $\text{CH}_2$ ), 4.01 (m, 2H,  $\text{CH}_2$ ), 7.11–7.15 (m, 2H, Ph), 7.17–7.22 (m, 2H for Ph and 2H for Np), 7.26–7.30 (m, 4H, Np), 7.34 (d,  $J = 9.2$  Hz, 2H, Np), 7.42–7.46 (m, 4H, Ph), 7.82 (d,  $J = 8.1$  Hz, 2H, Np), 7.90 (d,  $J = 9.0$  Hz, 2H, Np), 9.98 ppm (s, 2H, CHO);  $^{13}\text{C}$  NMR ( $\text{CDCl}_3$ , 100 MHz)  $\delta = 25.46, 25.52, 29.0, 29.4, 68.1, 69.8, 112.7, 116.1, 120.9, 122.1, 123.5, 123.6, 125.6, 126.2, 127.9, 129.2, 129.4, 130.1, 134.3, 137.9, 154.6, 159.8, 192.4$  ppm; IR (neat) 3057, 2938, 2866, 2729, 1694, 1593, 1504, 1456, 1387, 1325, 1260, 1169, 1148, 1086, 1047, 864, 808, 787, 750, 683, 648  $\text{cm}^{-1}$ ; HRMS (ESI) calcd for  $\text{C}_{46}\text{H}_{46}\text{O}_6\text{Na}$  717.3198, found 717.3168 ( $[\text{M}+\text{Na}]^+$ ).

#### Compound data for 7d

Brownish solid, 761 mg, 47% yield;  $^1\text{H}$  NMR ( $\text{CDCl}_3$ , 400 MHz)  $\delta = 0.89\text{--}0.92$  (m, 4H,  $\text{CH}_2$ ), 1.07–1.08 (m, 4H,  $\text{CH}_2$ ), 1.36–1.43 (m, 8H,  $\text{CH}_2$ ), 3.67 (t,  $J = 6.6$  Hz, 4H,  $\text{CH}_2$ ), 3.86–3.88 (m, 2H,  $\text{CH}_2$ ), 3.90–3.99 (m, 2H,  $\text{CH}_2$ ), 5.42 (s, 2H, CH), 5.94 (s, 4H, pyrrole- $\beta$ ), 6.14–6.16 (m, 4H, pyrrole- $\beta$ ), 6.67 (m, 4H, pyrrole- $\alpha$ ), 6.73 (d,  $J = 6.4$  Hz, 4H, Ph), 6.79 (d,  $J = 7.5$  Hz, 2H, Ph), 7.13–7.28 (m, 2H for Ph and 6H for Np), 7.37 (d,  $J = 9.0$  Hz, 2H, Np), 7.80 (d,  $J = 8.1$  Hz, 2H, Np), 7.87 (d,  $J = 9.0$  Hz, 2H, Np), 7.93 ppm (s, 4H, NH);  $^{13}\text{C}$  NMR ( $\text{CDCl}_3$ , 100 MHz)  $\delta = 25.52, 25.54, 29.1, 29.4, 44.1, 67.8, 69.8, 107.3, 108.5, 112.9, 115.0, 116.1, 117.3, 120.7, 120.9, 123.6, 125.6, 126.2, 127.9, 129.2, 129.4, 129.7, 132.5, 134.3, 143.7, 154.6, 159.5$  ppm; IR (KBr) 3375, 3098, 3055, 2936, 2860, 1724, 1593, 1506, 1489, 1468, 1429, 1398, 1354, 1317, 1261, 1148, 1115, 1088, 1028, 883, 810, 758, 719  $\text{cm}^{-1}$ ; HRMS (APCI) calcd for  $\text{C}_{62}\text{H}_{63}\text{N}_4\text{O}_4$  927.4844, found 927.4831 ( $[\text{M}+\text{H}]^+$ ).

#### Compound data for 1d

Purple solid, 23.1 mg, 3.7% yield;  $^1\text{H}$  NMR ( $\text{CDCl}_3$ , 400 MHz)  $\delta = -1.92$  (s, 2H, NH), 0.01 (m, 8H,  $\text{CH}_2$ ), 0.59–0.67 (m, 12H,  $\text{CH}_2$ ), 0.76 (m, 4H,  $\text{CH}_2$ ), 1.41 (m, 8H,  $\text{CH}_2$ ), 2.29 (m, 4H,  $\text{CH}_2$ ), 2.57 (m, 4H,  $\text{CH}_2$ ),

3.50–3.55 (m, 4H, CH<sub>2</sub>), 3.58–3.64 (m, 4H, CH<sub>2</sub>), 4.89 (d, *J* = 8.8 Hz, 4H, Np), 5.73 (d, *J* = 8.8 Hz, 4H, Np), 6.42 (d, *J* = 8.4 Hz, 4H, Np), 6.77 (t, *J* = 7.3 Hz, 4H, Np), 6.88–6.95 (m, 4H for Ph and 8H for Np), 7.28 (dd, *J* = 2.0, 9.2 Hz, 4H, Ph), 7.74 (t, *J* = 7.9 Hz, 4H, Ph), 8.31 (d, *J* = 7.3 Hz, 4H, Ph), 8.95 (s, 4H, β), 9.05 ppm (s, 4H, β); <sup>13</sup>C NMR (CDCl<sub>3</sub>, 100 MHz) δ = 24.5, 24.8, 27.7, 28.9, 68.3, 68.4, 114.4, 117.2, 119.7, 120.2, 120.6, 123.0, 125.3, 125.56, 125.63, 127.4, 128.1, 128.2, 128.6, 130.8, 132.5, 133.6, 143.2, 153.7, 157.2 ppm; UV/Vis (1,4-dioxane): λ<sub>max</sub> (log ε) = 230 (5.52), 420 (5.68), 515 (4.36), 550 (3.93), 590 (3.82), 645 nm (3.60); IR (KBr) 3308, 3057, 2936, 2860, 1595, 1508, 1474, 1458, 1429, 1333, 1261, 1159, 1047, 1016, 918, 802, 748, 727 cm<sup>-1</sup>; HRMS (ESI) calcd for C<sub>108</sub>H<sub>98</sub>N<sub>4</sub>O<sub>8</sub>Na 1602.7310, found 1602.7351 ([M+Na]<sup>+</sup>).

#### Compound data for 2d

Purple solid, 23.5 mg, 89% yield; <sup>1</sup>H NMR (CDCl<sub>3</sub>, 400 MHz) δ = 0.03 (m, 8H, CH<sub>2</sub>), 0.58–0.64 (m, 12H, CH<sub>2</sub>), 0.74 (m, 4H, CH<sub>2</sub>), 1.43 (m, 8H, CH<sub>2</sub>), 2.33 (m, 4H, CH<sub>2</sub>), 2.65 (m, 4H, CH<sub>2</sub>), 3.52–3.59 (m, 4H, CH<sub>2</sub>), 3.62–3.69 (m, 4H, CH<sub>2</sub>), 5.01 (d, *J* = 9.0 Hz, 4H, Np), 5.89 (d, *J* = 8.9 Hz, 4H, Np), 6.47 (d, *J* = 8.5 Hz, 4H, Np), 6.80 (t, *J* = 7.6 Hz, 4H, Np), 6.95 (t, *J* = 7.3 Hz, 4H, Np), 7.04–7.06 (m, 4H for Ph and 4H for Np), 7.29 (dd, *J* = 2.0, 8.4 Hz, 4H, Ph), 7.76 (t, *J* = 7.9 Hz, 4H, Ph), 8.32 (d, *J* = 7.4 Hz, 4H, Ph), 9.06 (s, 4H, β), 9.21 ppm (s, 4H, β); <sup>13</sup>C NMR (CDCl<sub>3</sub>, 100 MHz) δ = 24.4, 24.8, 27.5, 29.0, 68.1, 68.6, 114.4, 117.1, 119.6, 120.3, 121.6, 123.3, 125.3, 125.7, 125.8, 127.6, 128.1, 128.4, 128.5, 132.7, 132.8, 133.4, 143.9, 150.4, 153.5, 156.9 ppm; UV/Vis (1,4-dioxane): λ<sub>max</sub> (log ε) = 230 (5.31), 426 (5.47), 555 (4.17), 593 nm (3.71); IR (KBr) 3055, 2936, 2862, 1697, 1620, 1593, 1508, 1474, 1427, 1265, 1238, 1211, 1173, 1080, 1057, 1003, 934, 868, 799, 748, 721, 702 cm<sup>-1</sup>; HRMS (APCI) calcd for C<sub>108</sub>H<sub>96</sub>N<sub>4</sub>O<sub>8</sub>Zn 1642.6585, found 1642.6598 ([M]<sup>-</sup>).

#### Compound data for 8d

Purple solid, 46.7 mg, 7.2% yield; <sup>1</sup>H NMR (CDCl<sub>3</sub>, 400 MHz) δ = -2.50 (s, 2H, NH), 1.07 (m, 8H, CH<sub>2</sub>), 1.17–1.44 (m, 16H, CH<sub>2</sub>), 1.61–1.76 (m, 8H, CH<sub>2</sub>), 3.69–4.08 (m, 16H, CH<sub>2</sub>), 6.97–7.21 (m, 16H, Np or Ph), 7.31–7.43 (m, 8H, Np or Ph), 7.68–7.96 (m, 16H, Np or Ph), 8.97–9.03 (m, 8H, β); <sup>13</sup>C NMR (CDCl<sub>3</sub>, 100 MHz) δ = 25.4, 25.5, 29.0, 29.3, 29.5, 68.3, 69.6, 69.9, 115.1, 115.6, 116.0, 116.2, 120.4, 121.0, 121.2, 121.6, 122.1, 123.3, 123.6, 125.7, 126.0, 126.1, 127.7, 127.8, 127.9, 128.9, 129.2, 129.6, 130.8, 131.8, 134.4, 134.5, 143.7, 154.8, 157.7; UV/Vis (1,4-dioxane): λ<sub>max</sub> (log ε) = 232 (5.40), 419 (5.66), 514 (4.31), 549 (3.89), 590 (3.75), 646 nm (3.53); IR (KBr) 3314, 3055, 2936, 2862, 1593, 1576, 1506, 1472, 1458, 1429, 1350, 1317, 1261, 1240, 1180, 1163, 1148, 1084, 1045, 1018, 997, 976, 804, 775, 746, 735 cm<sup>-1</sup>; HRMS (APCI) calcd for C<sub>108</sub>H<sub>98</sub>N<sub>4</sub>O<sub>8</sub> 1579.7423, found 1579.7415 ([M]<sup>-</sup>).

#### Compound data for 9d

Purple solid, 18.6 mg, 93% yield; <sup>1</sup>H NMR (CDCl<sub>3</sub>, 400 MHz) δ = 0.99 (m, 8H, CH<sub>2</sub>), 1.15–1.43 (m, 16H, CH<sub>2</sub>), 1.58–1.75 (m, 8H, CH<sub>2</sub>), 3.61–3.78 (m, 4H, CH<sub>2</sub>), 3.88–4.07 (m, 12H, CH<sub>2</sub>), 6.79–7.17 (m, 16H, Np or Ph), 7.30–7.40 (m, 8H, Np or Ph), 7.63–8.00 (m, 16H, Np or Ph), 8.95–9.19 (m, 8H, β); <sup>13</sup>C NMR (CDCl<sub>3</sub>, 100 MHz) δ = 25.2, 25.26, 25.34, 25.4, 25.5, 28.8, 28.9, 29.1, 29.2, 29.6, 68.2, 68.4, 69.6, 69.9, 115.0, 115.1, 115.5, 115.6, 115.9, 116.2, 121.0, 121.1, 121.3, 121.4, 121.8, 121.9, 123.3, 123.6, 125.6, 125.7, 126.0, 126.1, 127.35, 127.44, 127.5, 127.7, 127.9, 128.8, 129.2, 129.6, 132.2, 132.3, 134.3, 134.5, 144.3, 144.4, 150.6, 150.7, 154.6, 154.7, 157.6 ppm; UV/Vis (1,4-dioxane): λ<sub>max</sub> (log ε) = 231 (5.42), 425 (5.71), 555 (4.32), 595 nm (3.82); IR (KBr) 3055,



2936, 2864, 1653, 1593, 1576, 1558, 1506, 1489, 1474, 1458, 1431, 1337, 1261, 1182, 1084, 1047, 999, 799, 750  $\text{cm}^{-1}$ ; HRMS (APCI) calcd for  $\text{C}_{108}\text{H}_{96}\text{N}_4\text{O}_8\text{Zn}$  1642.6548, found 1642.6535 ( $[\text{M}]^-$ ).

#### Compound data for 12

Purple solid, 113 mg, 30% yield;  $^1\text{H}$  NMR ( $\text{CDCl}_3$ , 400 MHz)  $\delta = -2.62$  (s, 2H, NH), 0.27–0.47 (m, 4H,  $\text{CH}_2$ ), 0.64–0.84 (m, 4H,  $\text{CH}_2$ ), 1.26–1.43 (m, 4H,  $\text{CH}_2$ ), 2.73 (m, 2H,  $\text{CH}_2$ ), 2.94 (m, 2H,  $\text{CH}_2$ ), 3.54–3.69 (m, 4H,  $\text{CH}_2$ ), 4.62 (d,  $J = 9.0$  Hz, 2H, Np), 4.68 (d,  $J = 9.1$  Hz, 2H, Np), 6.19 (d,  $J = 8.1$  Hz, 2H, Np), 6.37 (d,  $J = 8.4$  Hz, 2H, Np), 6.66–6.69 (m, 2H for Ph and 2H for Np), 6.75 (t,  $J = 7.1$  Hz, 2H, Np), 7.29 (dd,  $J = 2.3, 8.3$  Hz, 2H, Ph), 7.83 (t,  $J = 7.9$  Hz, 2H, Ph), 8.48 (d,  $J = 7.4$  Hz, 2H, Ph), 9.09 (d,  $J = 4.6$  Hz, 2H,  $\beta$ ), 9.18 (d,  $J = 4.4$  Hz, 2H,  $\beta$ ), 9.36 (d,  $J = 4.4$  Hz, 2H,  $\beta$ ), 9.43 (d,  $J = 4.5$  Hz, 2H,  $\beta$ ), 10.29 ppm (s, 2H, meso);  $^{13}\text{C}$  NMR ( $\text{CDCl}_3$ , 100 MHz)  $\delta = 21.1, 27.3, 28.1, 67.7, 68.1, 105.5, 112.7, 117.3, 118.5, 119.1, 121.0, 122.6, 124.9, 125.1, 125.2, 127.0, 127.5, 128.0, 128.4, 130.0, 130.7, 132.7, 133.2, 133.3, 142.5, 142.9, 144.0, 148.8, 150.5, 153.0, 157.1$  ppm; UV/Vis (1,4-dioxane):  $\lambda_{\text{max}}$  ( $\log \epsilon$ ) = 231 (5.13), 408 (5.51), 502 (4.21), 537 (3.67), 576 (3.72), 630 nm (3.16); IR (KBr) 3289, 3055, 2949, 2868, 1595, 1506, 1489, 1474, 1458, 1429, 1321, 1261, 1240, 1223, 1204, 1144, 1076, 1047, 1013, 961, 918, 851, 791, 750, 735, 692  $\text{cm}^{-1}$ ; HRMS (APCI) calcd for  $\text{C}_{62}\text{H}_{52}\text{N}_4\text{O}_4$  916.3994, found 916.4025 ( $[\text{M}]^-$ ).

#### Compound data for 13

Purple solid, 56.3 mg, 93% yield;  $^1\text{H}$  NMR ( $\text{CDCl}_3$ , 400 MHz)  $\delta = 0.23$  (m, 2H,  $\text{CH}_2$ ), 0.41 (m, 2H,  $\text{CH}_2$ ), 0.51 (m, 2H,  $\text{CH}_2$ ), 0.61 (m, 2H,  $\text{CH}_2$ ), 1.23–1.30 (m, 4H,  $\text{CH}_2$ ), 2.65 (m, 2H,  $\text{CH}_2$ ), 2.79 (m, 2H,  $\text{CH}_2$ ), 3.47–3.62 (m, 4H,  $\text{CH}_2$ ), 4.91 (d,  $J = 9.0$  Hz, 2H, Np), 5.23 (d,  $J = 9.0$  Hz, 2H, Np), 6.42 (d,  $J = 8.5$  Hz, 2H, Np), 6.55 (s, 2H, Ph), 6.61 (d,  $J = 8.2$  Hz, 2H, Np), 6.72 (t,  $J = 7.6$  Hz, 2H, Np), 6.85 (t,  $J = 7.5$  Hz, 2H, Np), 7.24 (dd,  $J = 2.4, 8.3$  Hz, 2H, Ph), 7.83 (t,  $J = 7.9$  Hz, 2H, Ph), 8.46 (d,  $J = 7.3$  Hz, 2H, Ph), 9.02 (d,  $J = 4.5$  Hz, 2H,  $\beta$ ), 9.13 (d,  $J = 4.4$  Hz, 2H,  $\beta$ ), 9.25 (d,  $J = 4.4$  Hz, 2H,  $\beta$ ), 9.35 (d,  $J = 4.2$  Hz, 2H,  $\beta$ ), 10.07 ppm (s, 2H, meso);  $^{13}\text{C}$  NMR ( $\text{CDCl}_3$ , 100 MHz)  $\delta = 21.2, 27.4, 28.2, 68.1, 68.4, 106.2, 106.4, 113.4, 117.1, 119.0, 119.9, 120.8, 123.0, 125.0, 125.1, 125.4, 127.2, 127.6, 128.1, 128.3, 132.1, 132.6, 133.3, 144.0, 149.5, 150.2, 153.1, 156.8$  ppm; UV/Vis (1,4-dioxane):  $\lambda_{\text{max}}$  ( $\log \epsilon$ ) = 231 (4.98), 413 (5.47), 543 (4.14), 578 nm (3.32); IR (KBr) 3057, 2947, 2868, 1595, 1506, 1491, 1474, 1458, 1429, 1393, 1319, 1285, 1263, 1240, 1211, 1059, 993, 806, 783, 750, 727, 700  $\text{cm}^{-1}$ ; HRMS (APCI) calcd for  $\text{C}_{62}\text{H}_{50}\text{N}_4\text{O}_4\text{Zn}$  978.3129, found 978.3146 ( $[\text{M}]^-$ ).

## [C] Kinetic Resolution of Styrene Oxide

### General procedure

A 30 mL stainless autoclave was charged with styrene oxide (**10**, 0.50 mmol), catalyst (0.05 mol%), TBAB (0.10 mol%), and then CO<sub>2</sub> (1.7 MPa). The mixture was heated with stirring at 50 °C for 24 h. The reaction mixture was cooled in ice water, and excess CO<sub>2</sub> was released carefully. **10** and styrene carbonate (**11**) were separated by silica gel column chromatography (hexane/EtOAc = 3/1). The enantiomeric purity of **11** was determined by HPLC using chiral columns (Daicel Chemical Industries), and that of **10** was determined by GC with a CP-cyclodextrin- $\beta$ -2,3,6-M-19 column (Varian,  $\phi$  0.25 mm  $\times$  25 m). The absolute configurations of **10** and **11** were determined by comparison with the reported literature.<sup>[S4]</sup>

### Kinetic resolution of **10**

50 °C, 6 h. (*R*)-**10**: Pale yellow oil; <sup>1</sup>H NMR (CDCl<sub>3</sub>, 400 MHz)  $\delta$  = 2.81 (dd, *J* = 2.8, 5.6 Hz, 1H), 3.15 (dd, *J* = 4.4, 5.8 Hz, 1H), 3.86 (dd, *J* = 2.4, 3.8 Hz, 1H), 7.27–7.38 (m, 5H); GC for **10**: Inj. 250 °C, Col. 75 °C, Det. 220 °C, (*R*) 38.1 min, (*S*) 40.3 min. (*S*)-**11**: White solid;  $[\alpha]_D^{25} +26.1$  (*c* 0.54, CHCl<sub>3</sub>), 54% ee, lit.<sup>[S4]</sup>  $[\alpha]_D^{23} -18.2$  (*c* 1.00, CHCl<sub>3</sub>) for (*R*)-**11** with 42% ee; <sup>1</sup>H NMR (CDCl<sub>3</sub>, 400 MHz)  $\delta$  = 4.35 (t, *J* = 8.4 Hz, 1H), 4.80 (t, *J* = 8.0 Hz, 1H), 5.68 (t, *J* = 7.6 Hz, 1H), 7.36–7.38 (m, 2H), 7.42–7.47 (m, 3H); HPLC for **11**: Chiralcel OD-H, hexane/*i*-PrOH = 4/1, 0.5 mL/min, 220 nm, (*R*) 25.8 min, (*S*) 30.9 min.

**Table S1** Kinetic resolution of styrene oxide with CO<sub>2</sub>.<sup>a</sup>

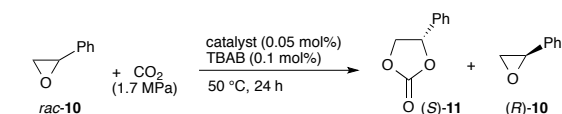

| Entry | Cat.      | <i>c</i> % <sup>b</sup> | % Yield <sup>c</sup> (% ee) <sup>d</sup> |                         | <i>s</i> value <sup>e</sup> |
|-------|-----------|-------------------------|------------------------------------------|-------------------------|-----------------------------|
|       |           |                         | ( <i>S</i> )- <b>11</b>                  | ( <i>R</i> )- <b>10</b> |                             |
| 1     | <b>9a</b> | 24                      | 15 (4.8)                                 | 56 (1.5)                | 1.1                         |
| 2     | <b>9b</b> | 41                      | 42 (5.2)                                 | 31 (3.6)                | 1.1                         |
| 3     | <b>9c</b> | 50                      | 40 (0.5)                                 | 26 (0.5)                | 1.0                         |
| 4     | <b>9d</b> | 50                      | 40 (0.5)                                 | 32 (0.5)                | 1.0                         |

<sup>a</sup>Reaction conditions: styrene oxide (0.3 mmol), Zn(II) porphyrin (0.05 mol%), TBAB (0.1 mol%), CO<sub>2</sub> (1.7 MPa) in a 30 mL autoclave. <sup>b</sup>Conversion calculated from  $c = ee(\mathbf{10}) / (ee(\mathbf{10}) + ee(\mathbf{11}))$ . <sup>c</sup>Isolated yield. <sup>d</sup>Determined by HPLC or GC analyses. <sup>e</sup>Calculated from  $s = \ln[1 - c(1 + ee(\mathbf{11}))] / \ln[1 - c(1 - ee(\mathbf{11}))]$ .

## [D] References

- [S1] J. E. Bäckvall, A. H. Ell, G. Csajernyik, V. F. Slagt, S. Berner, C. Puglia, G. Ledung and S. Oscarsson, *Eur. J. Org. Chem.*, 2006, 1193–1199.
- [S2] H. Jing, X. Jiang, F. Gou and F. Chen, *Green Chem.*, 2016, **18**, 3567–3576.
- [S3] S. Muthusamy, T. Karikalan and E. Suresh, *Tetrahedron Lett.*, 2011, **52**, 1934–1937.
- [S4] T. Ema, M. Yokoyama, S. Watanabe, S. Sasaki, H. Ota and K. Takaishi, *Org. Lett.*, 2017, **19**, 4070–4073.

[E] NMR Spectra

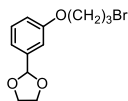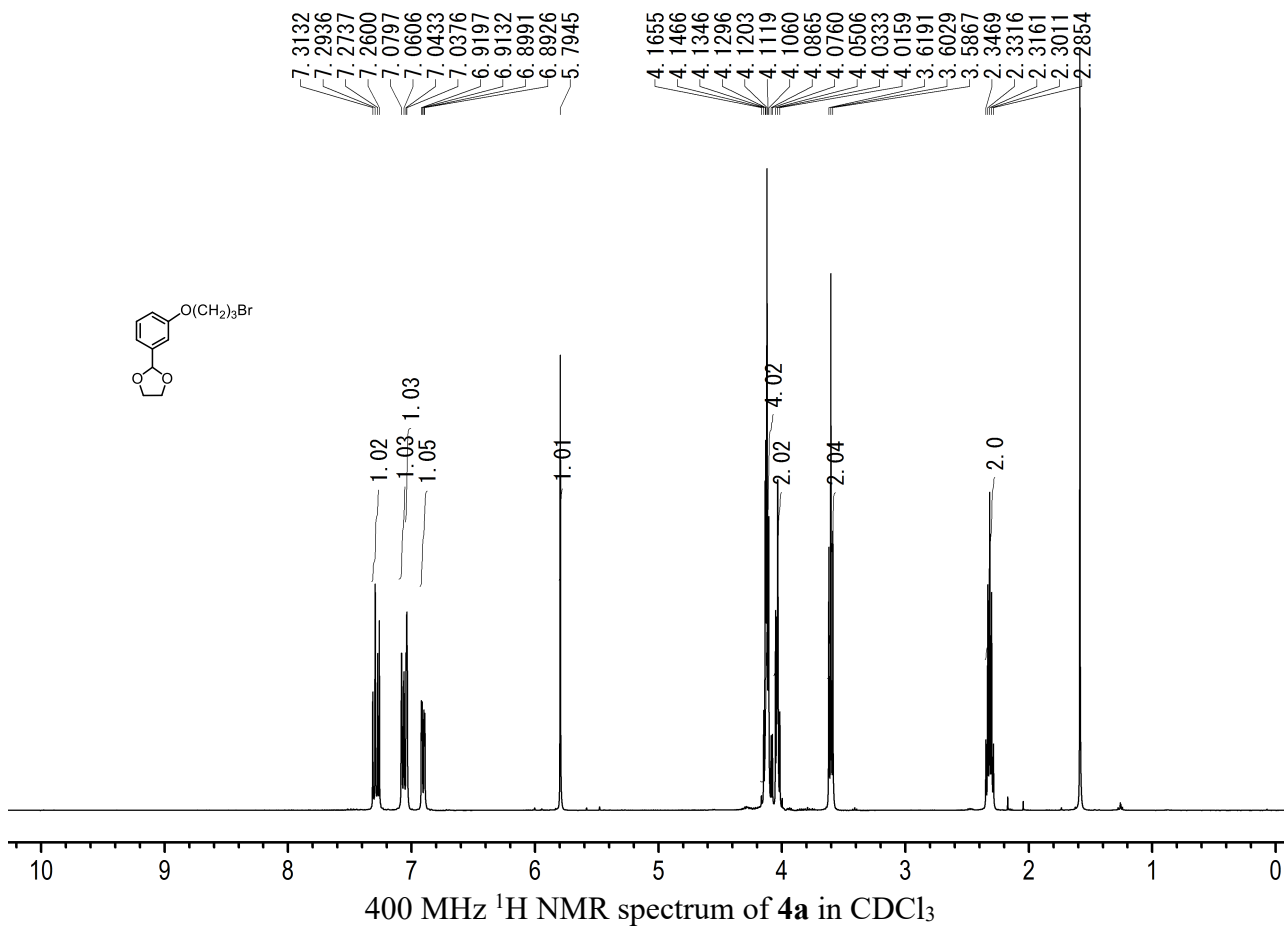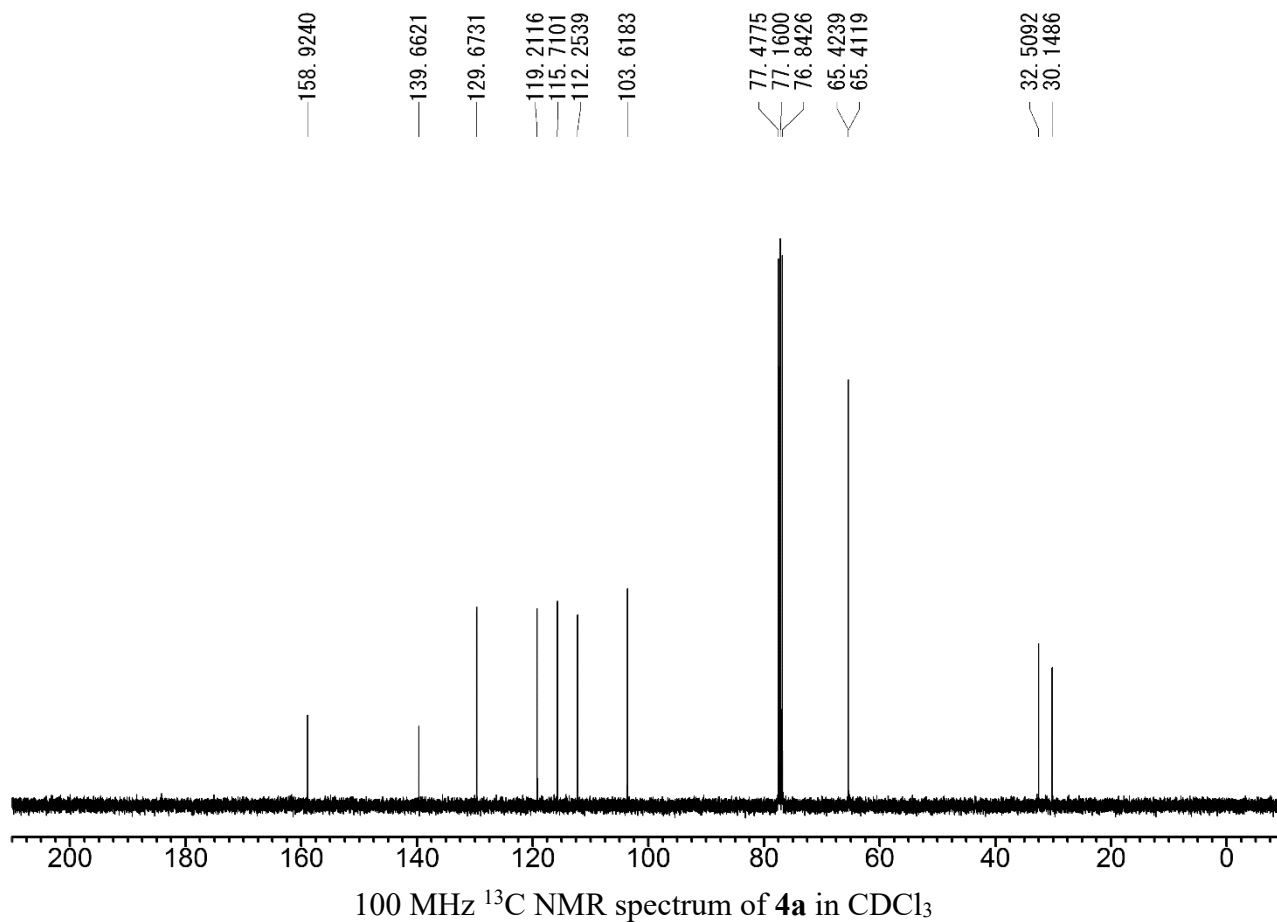

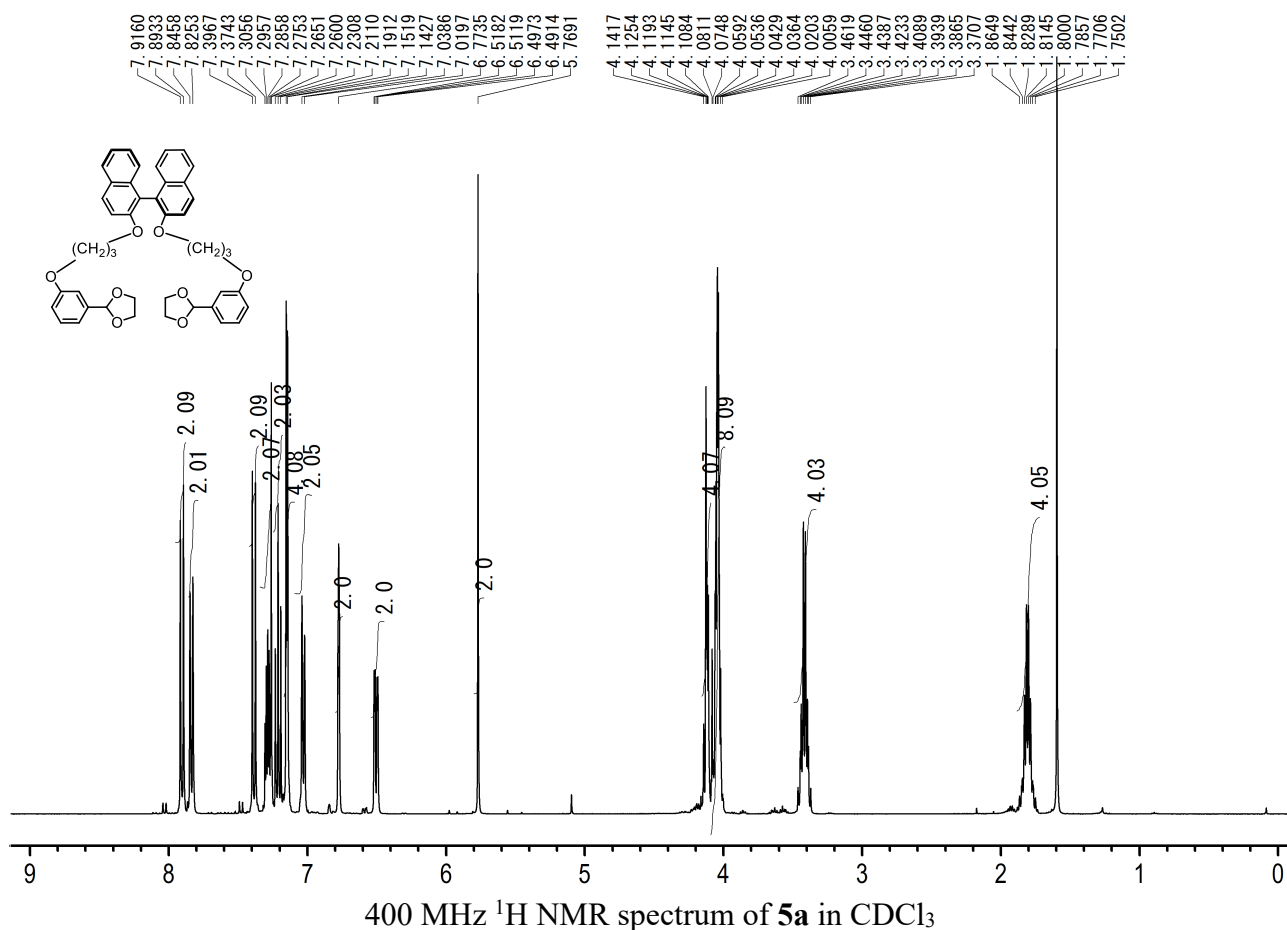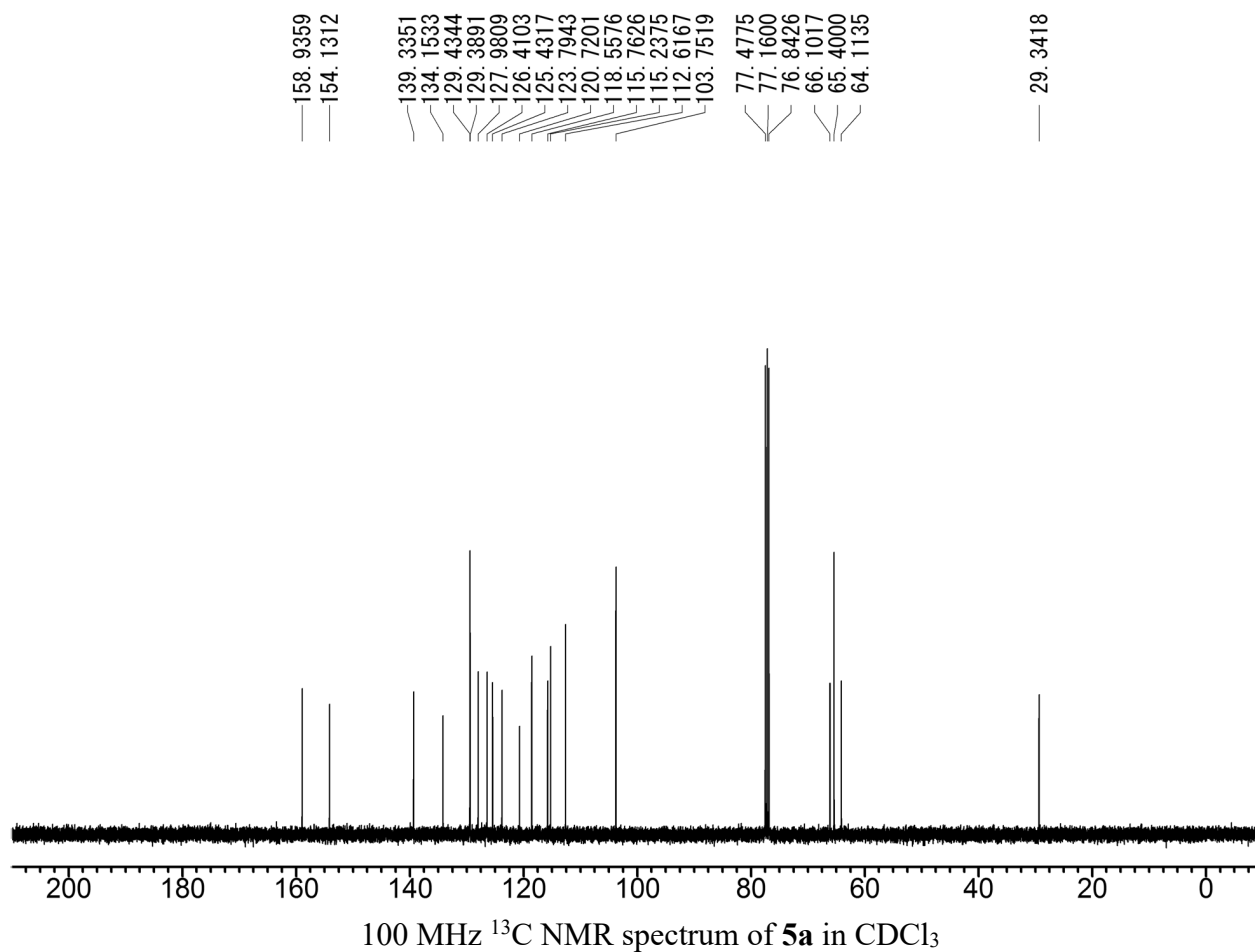

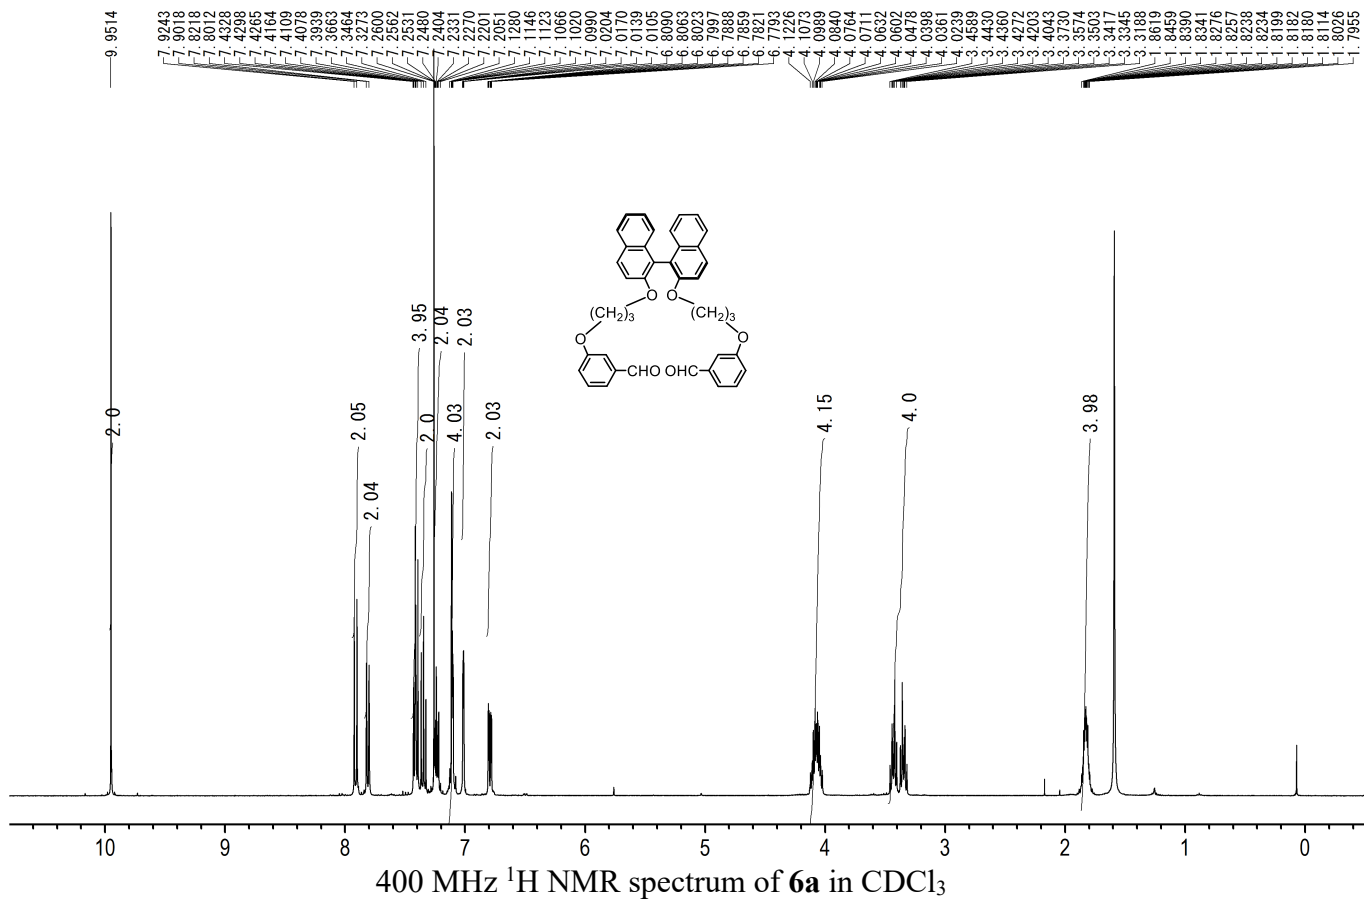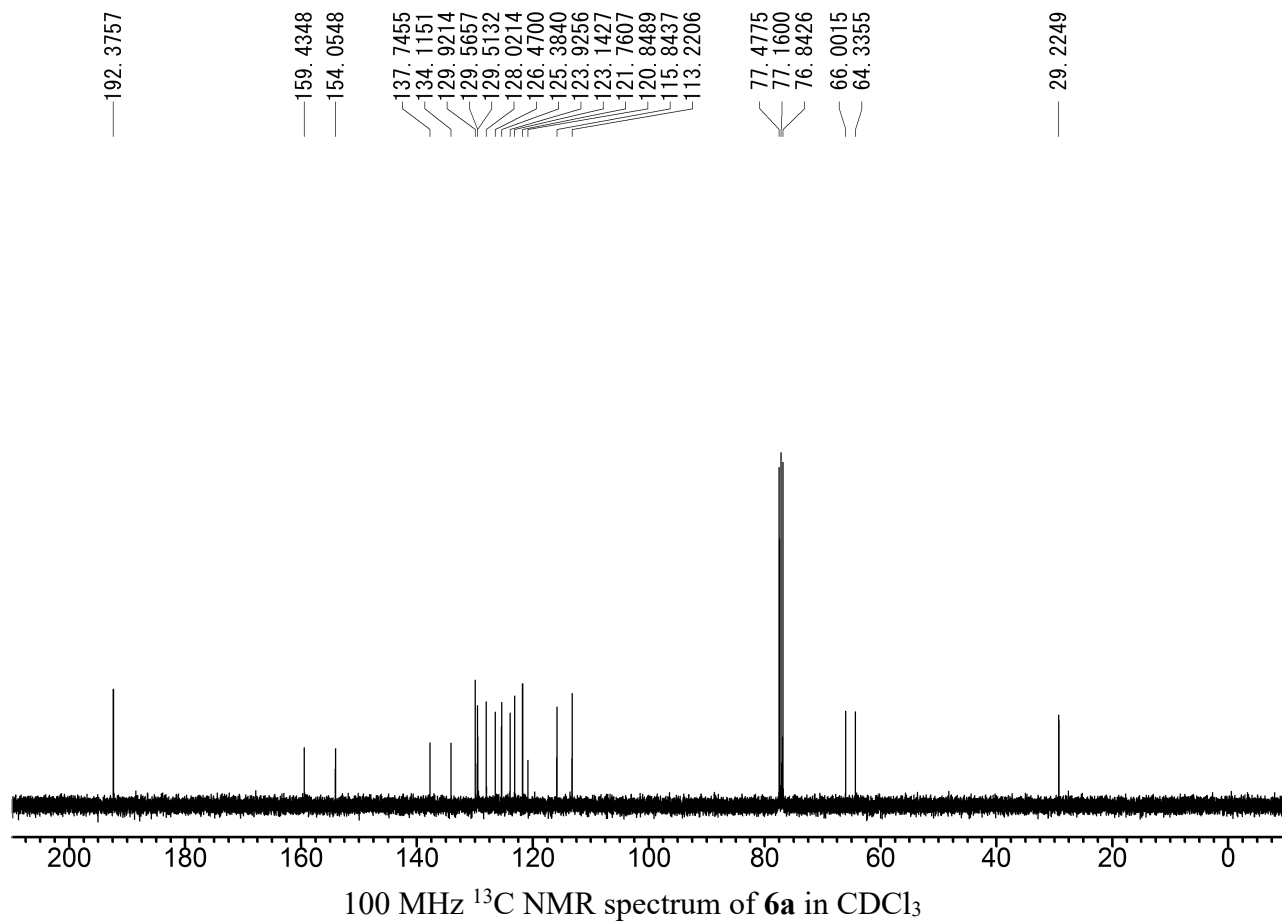

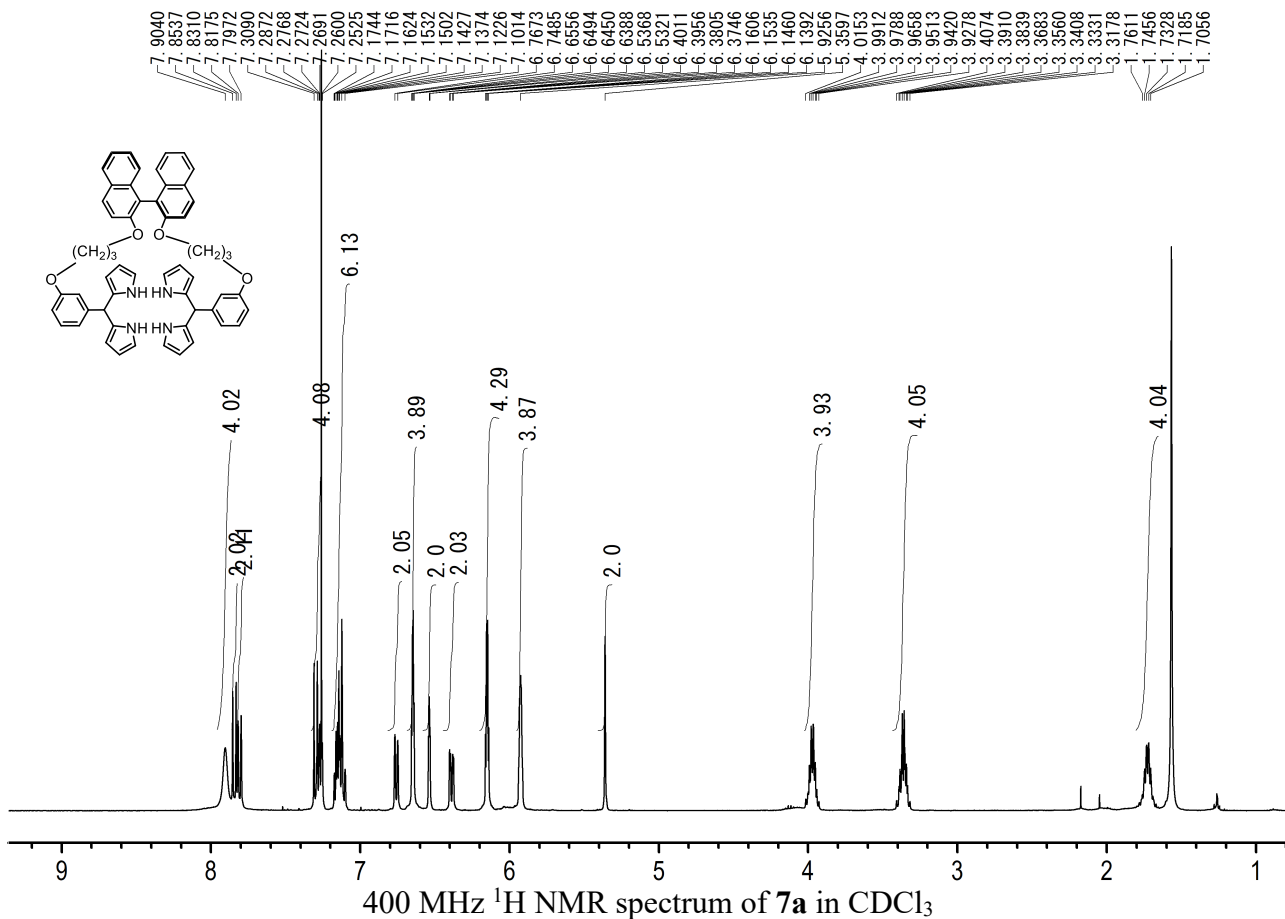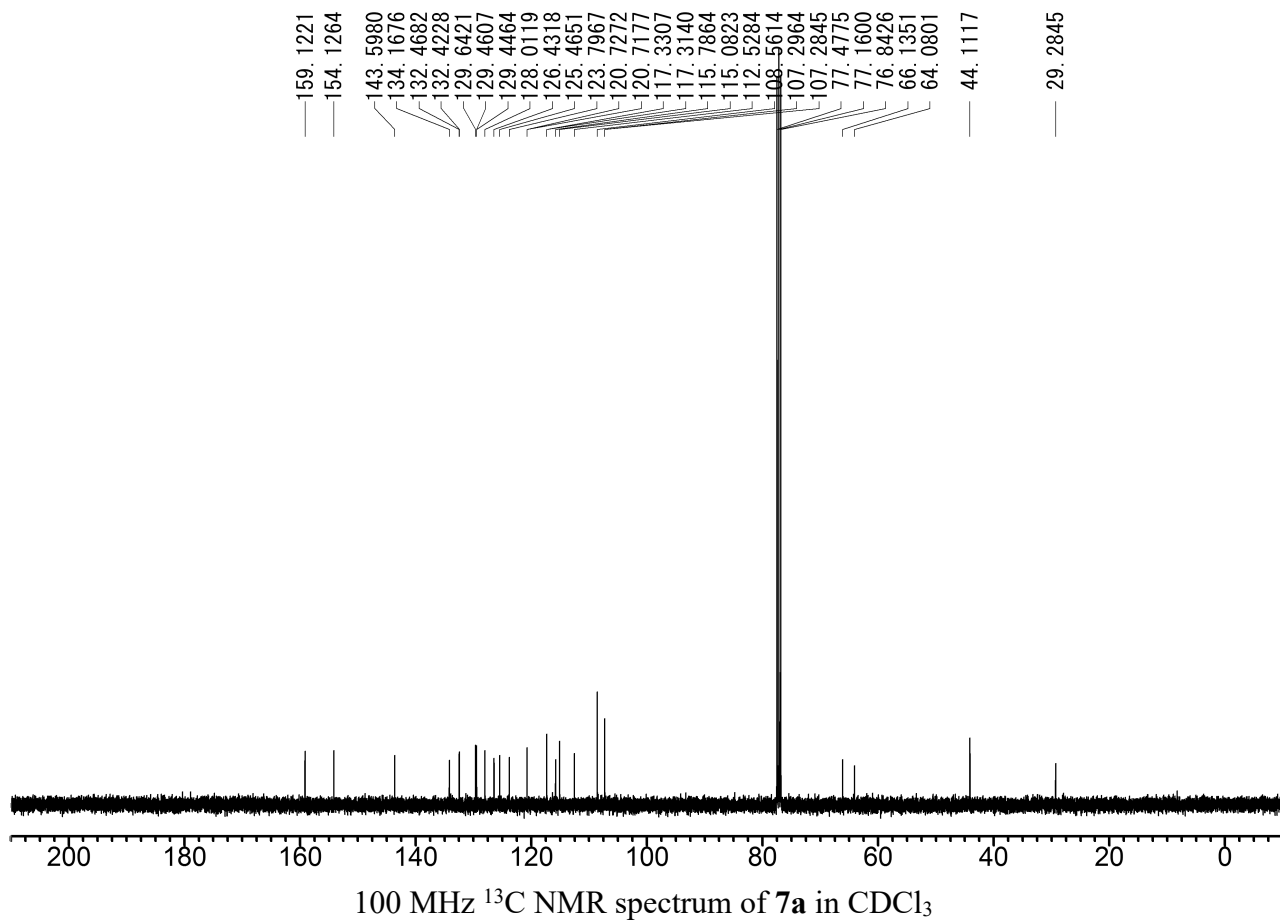

8.9998  
8.9804  
8.6414  
8.6231  
7.7895  
7.7699  
7.7500  
7.2600  
7.0591  
7.0539  
7.0381  
6.9038  
6.8866  
6.8672  
6.8513  
6.8307  
6.8135  
6.5700  
6.5493  
6.2303  
6.2104  
5.6082  
5.5429  
5.5202  
5.0798  
5.0572  
3.4895  
3.4705  
3.4440  
3.4300  
3.4124  
3.3801  
3.3600  
3.3425  
3.3161  
3.1932  
3.1821  
3.1657  
3.1549  
3.1378  
3.1265  
1.5967  
1.5560  
1.5351  
1.5106  
1.4790  
1.3862  
1.3713  
1.3577  
1.3441  
1.3286  
1.3122  
0.0059

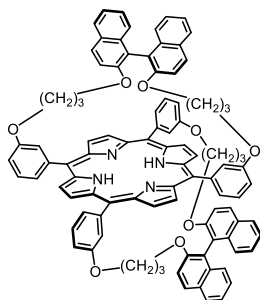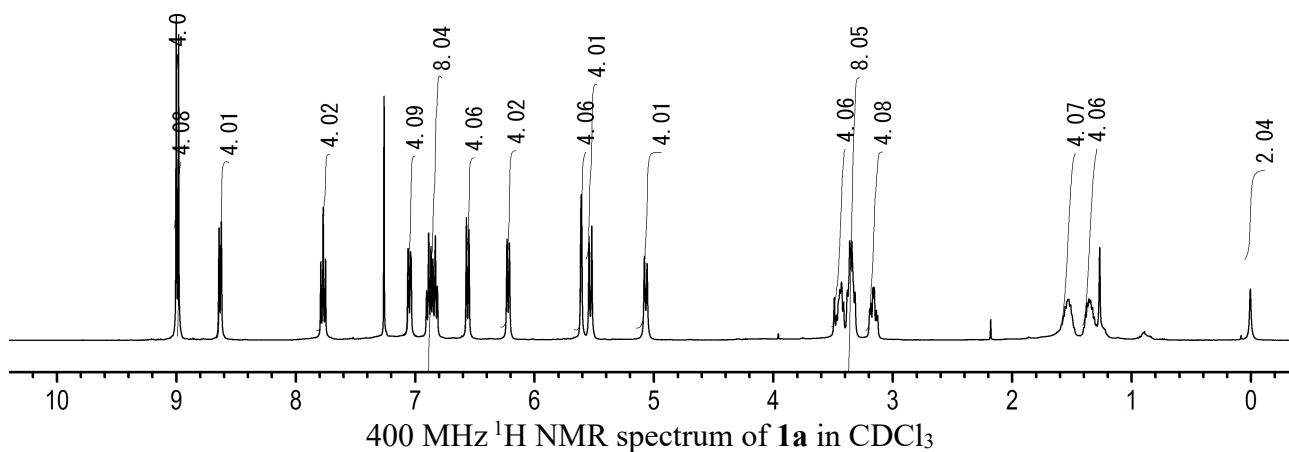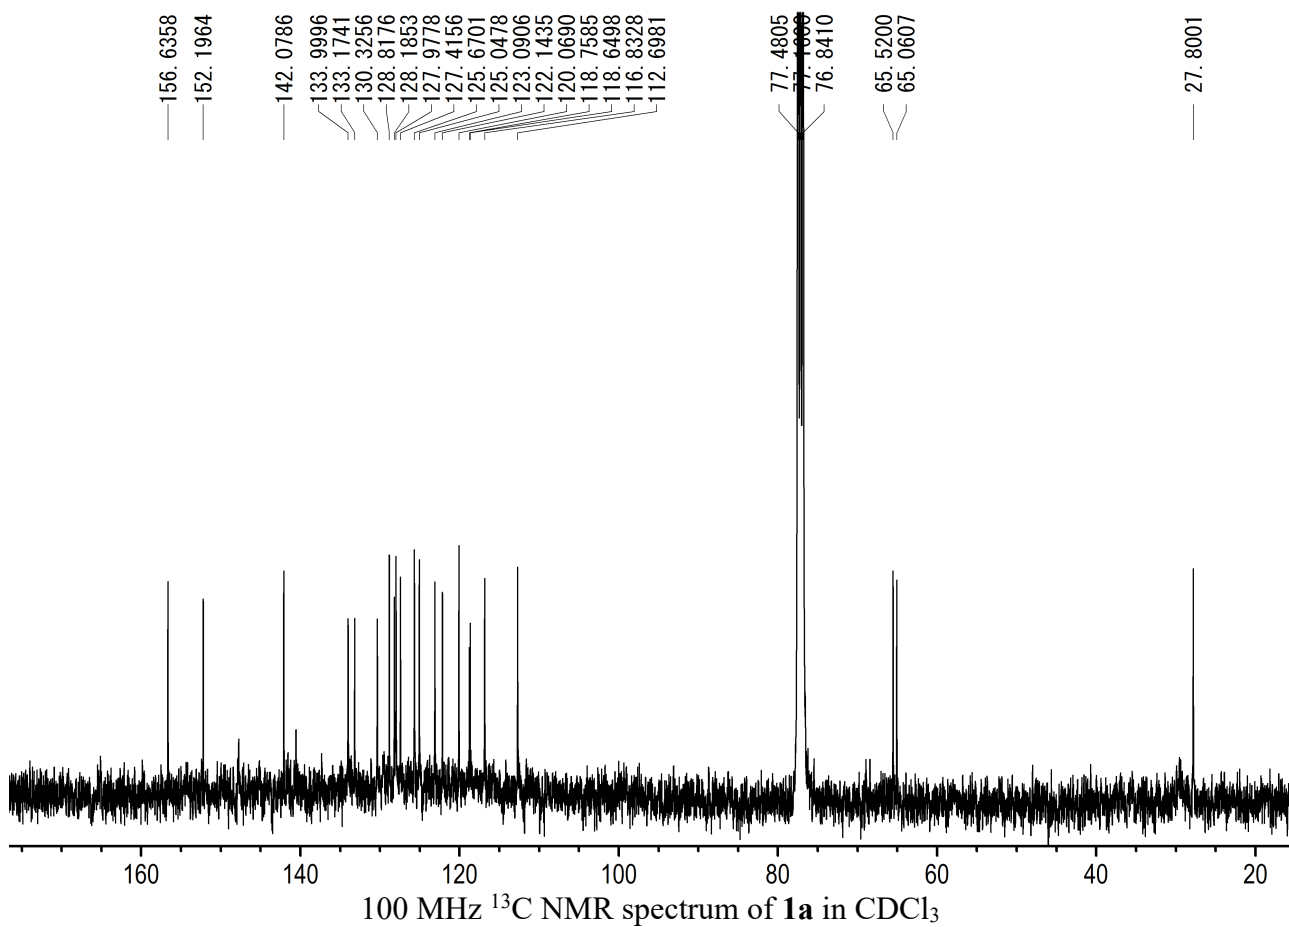

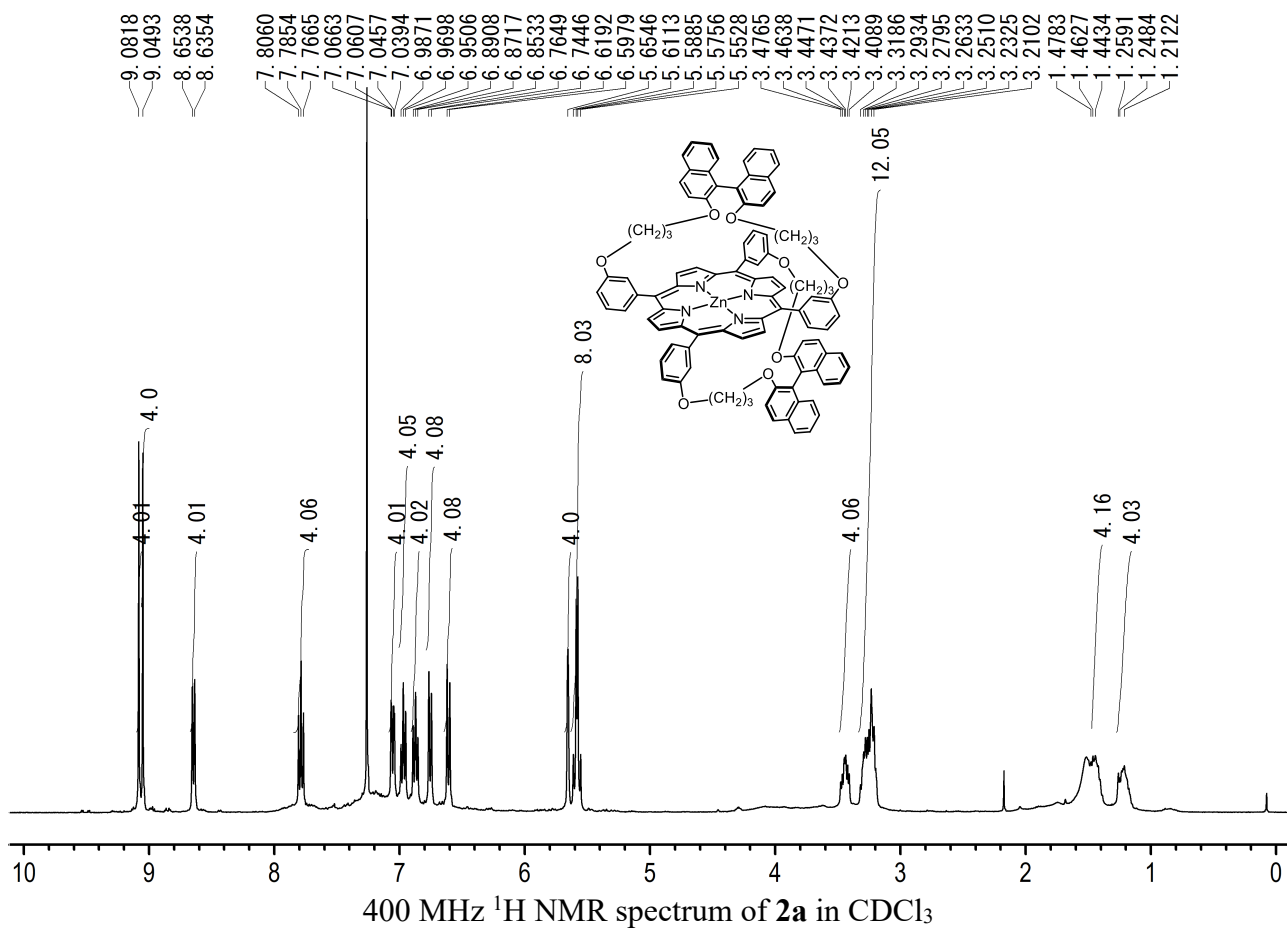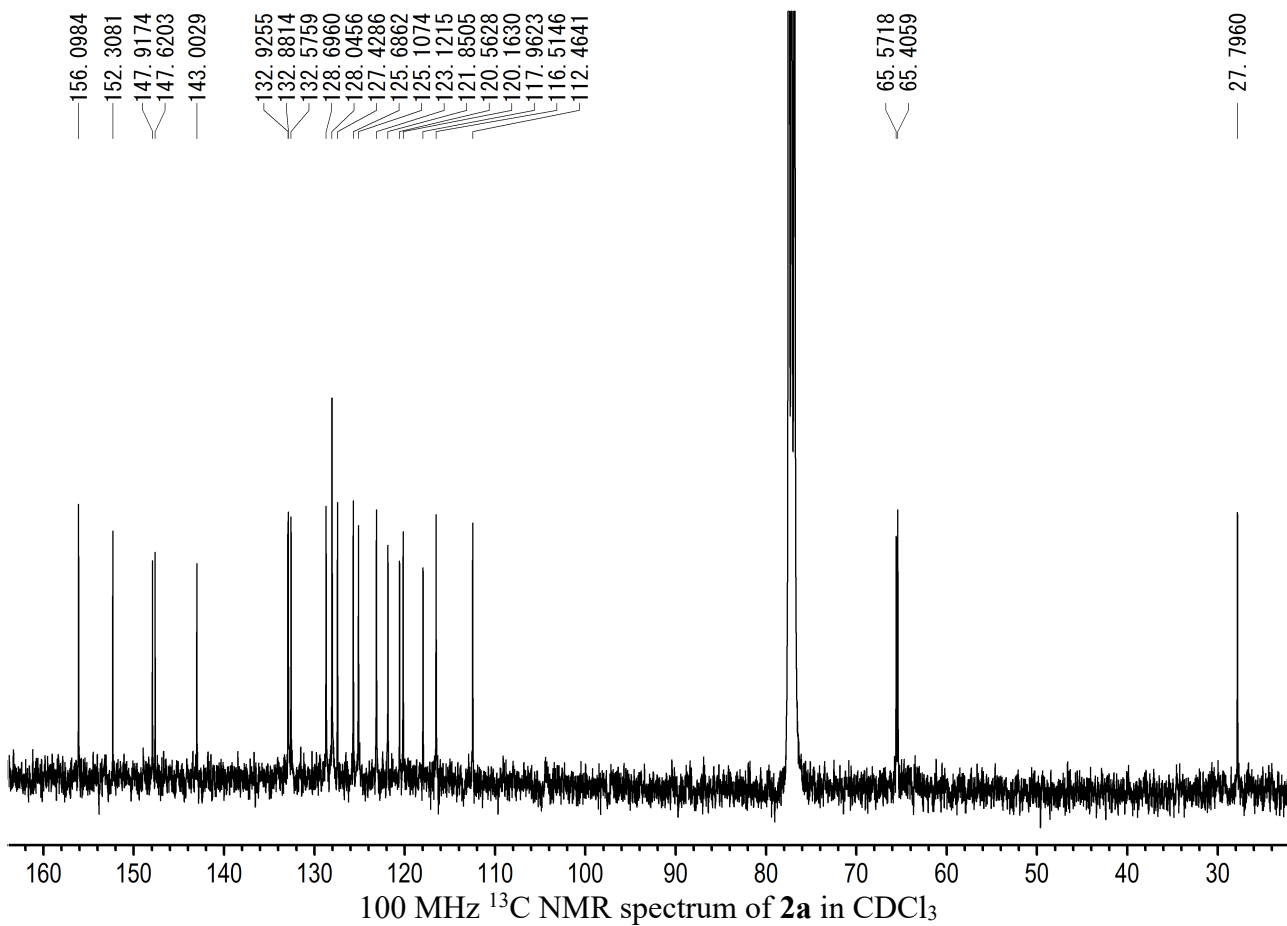



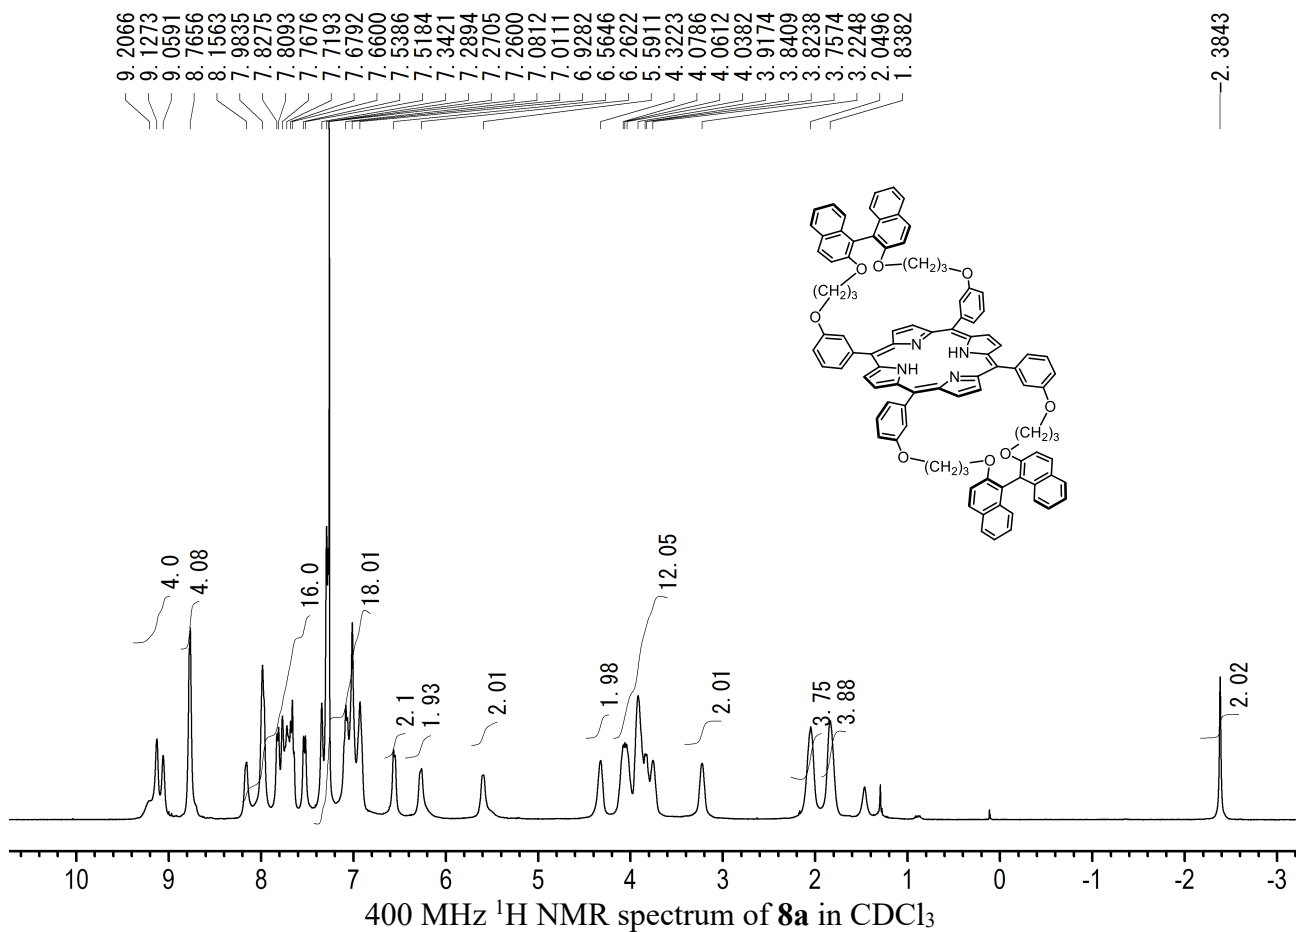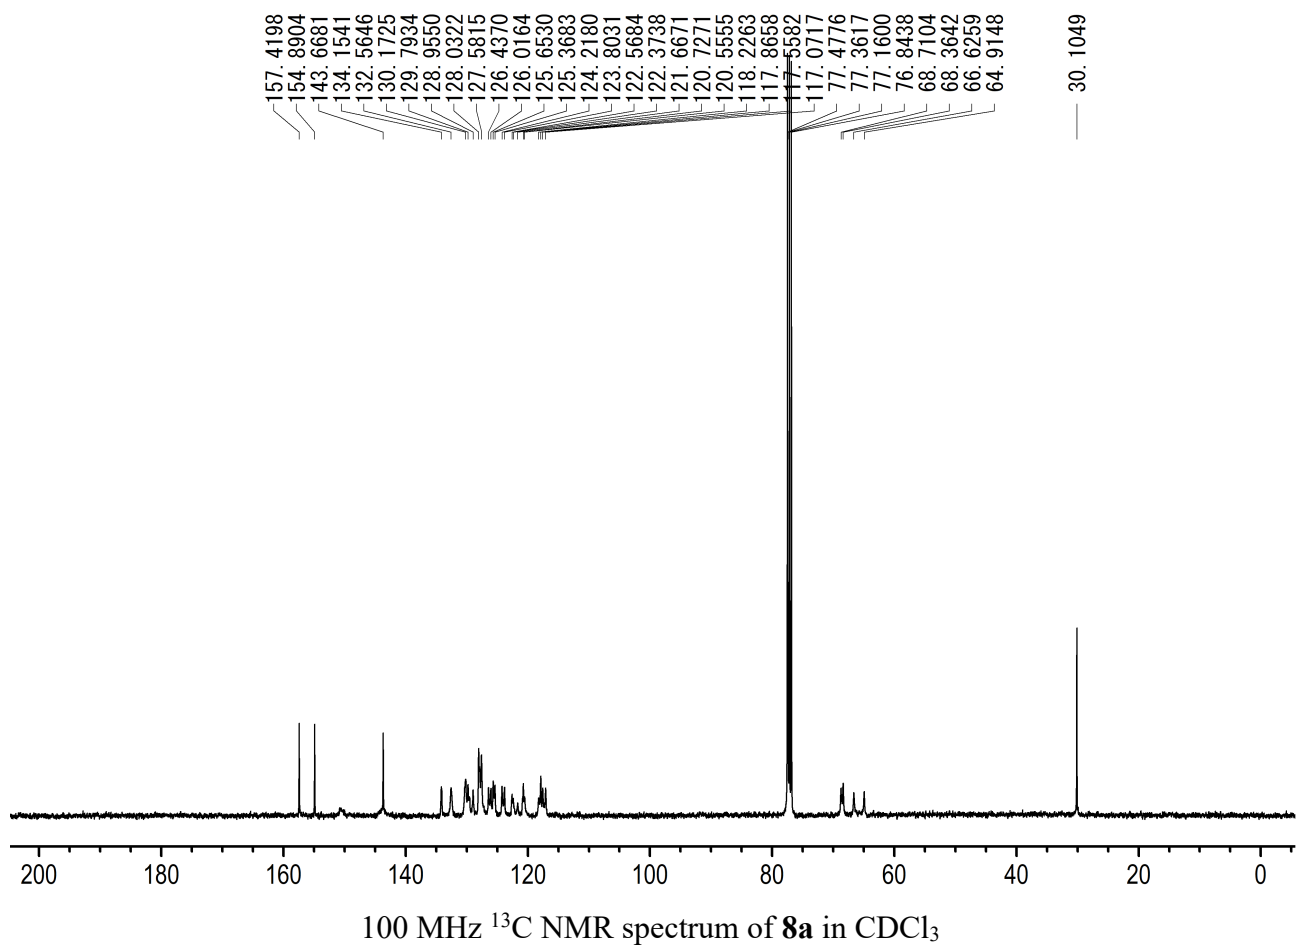

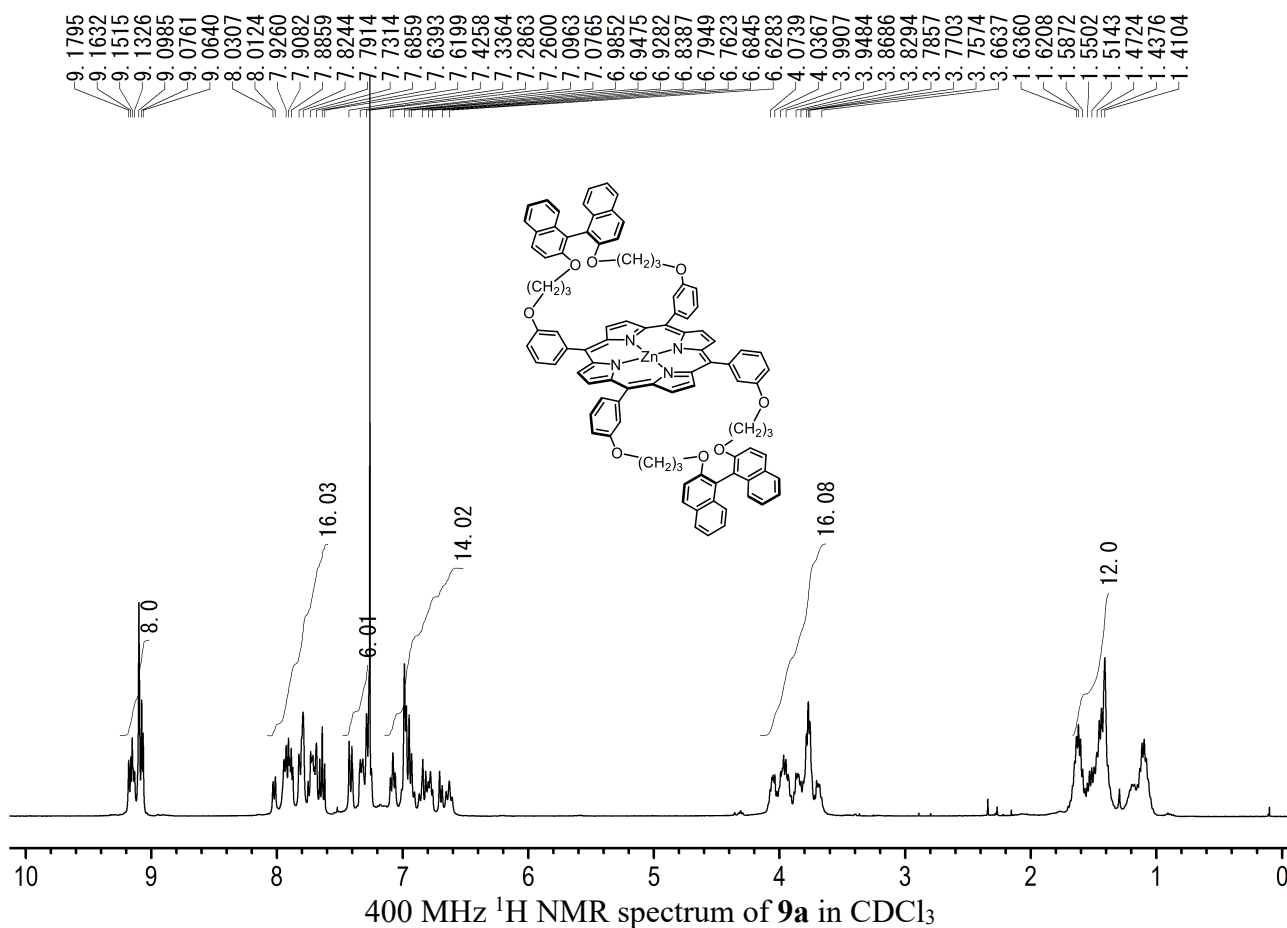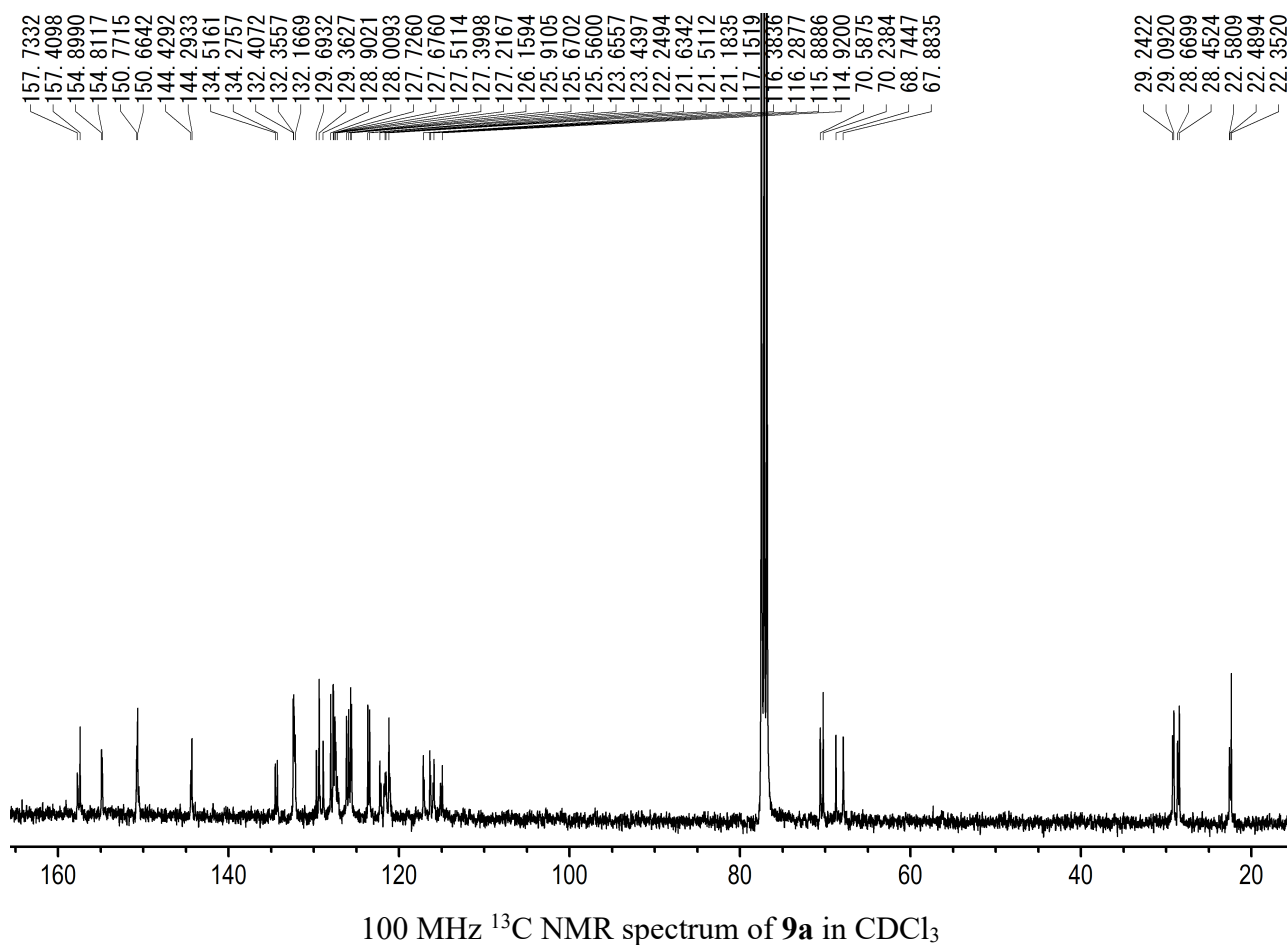

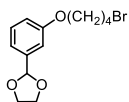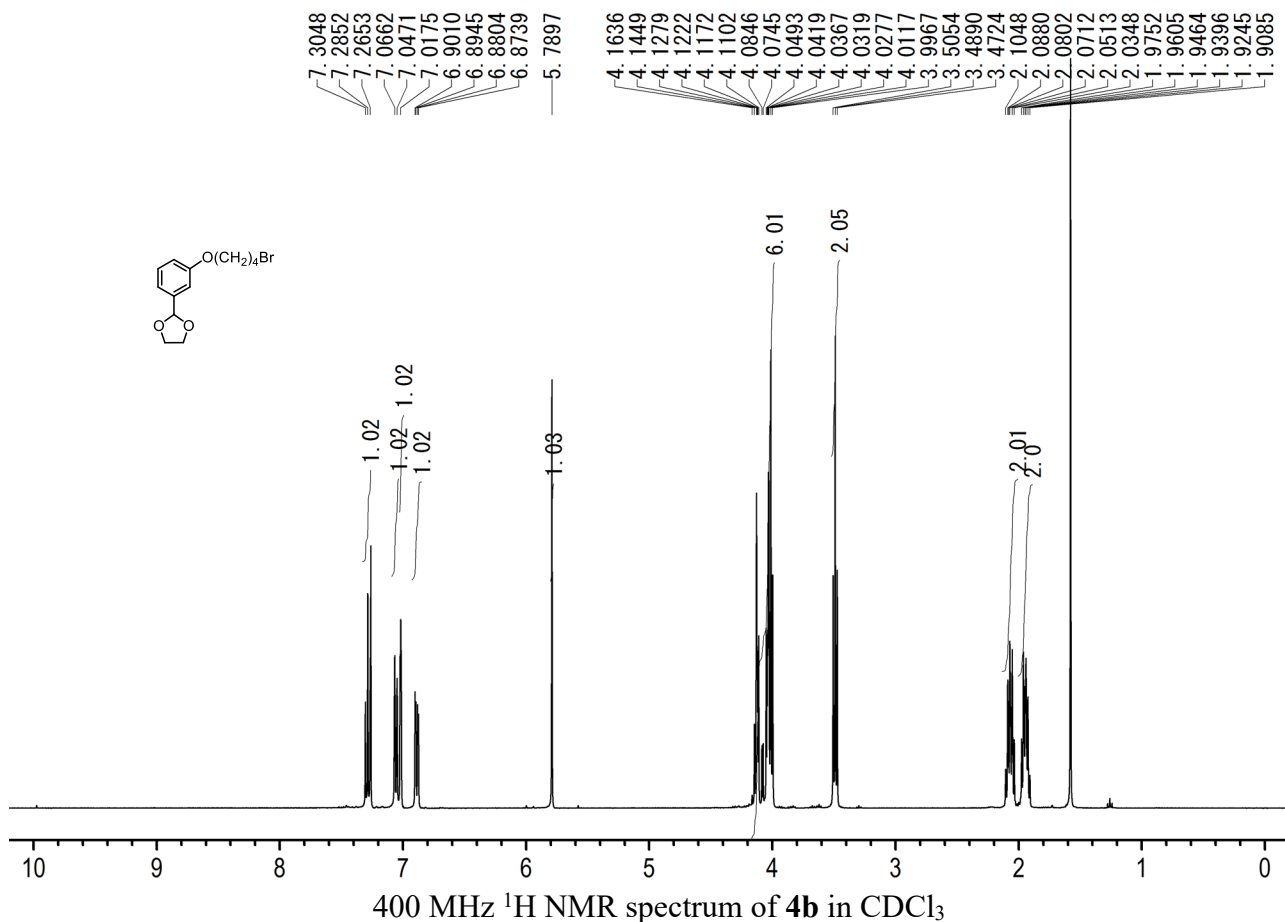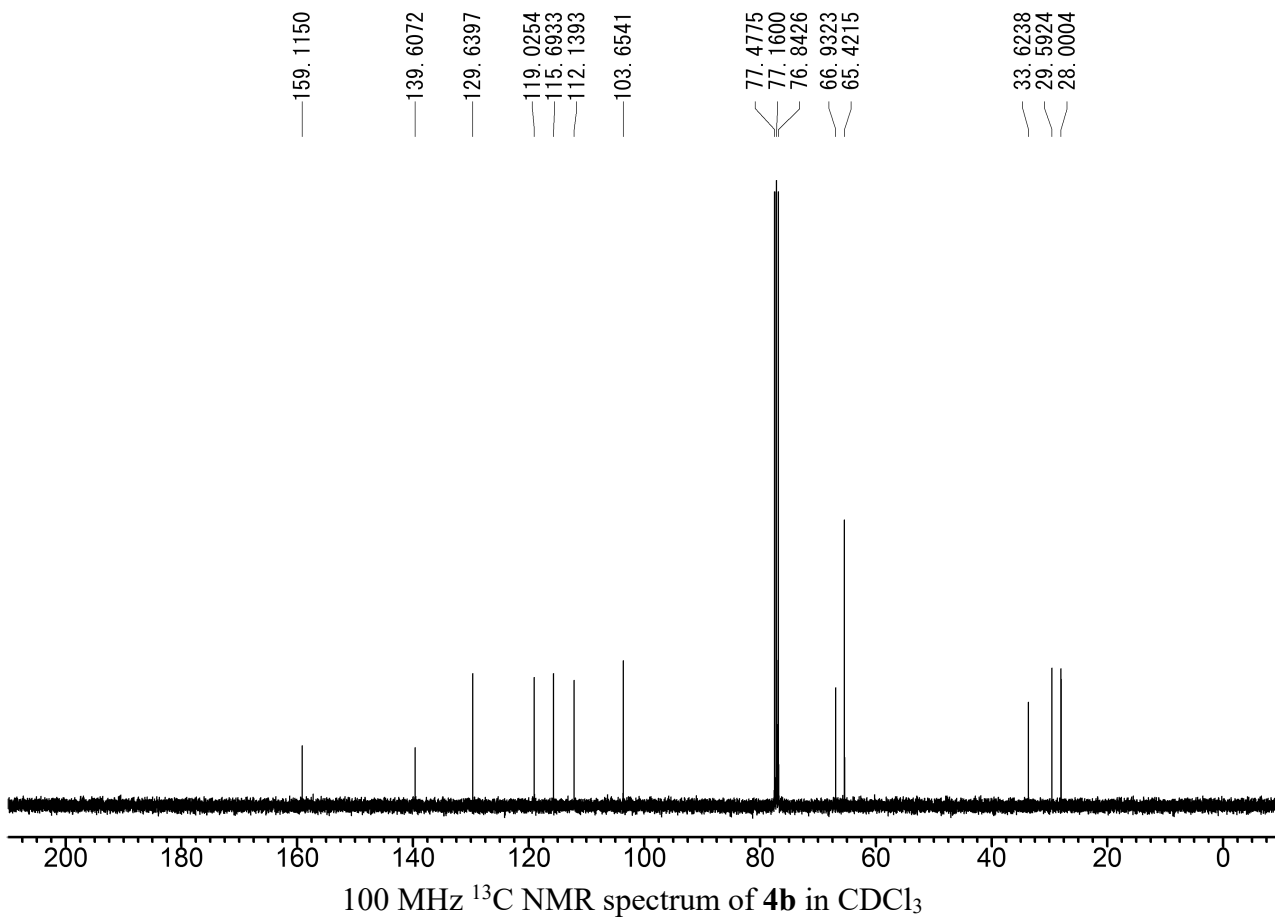



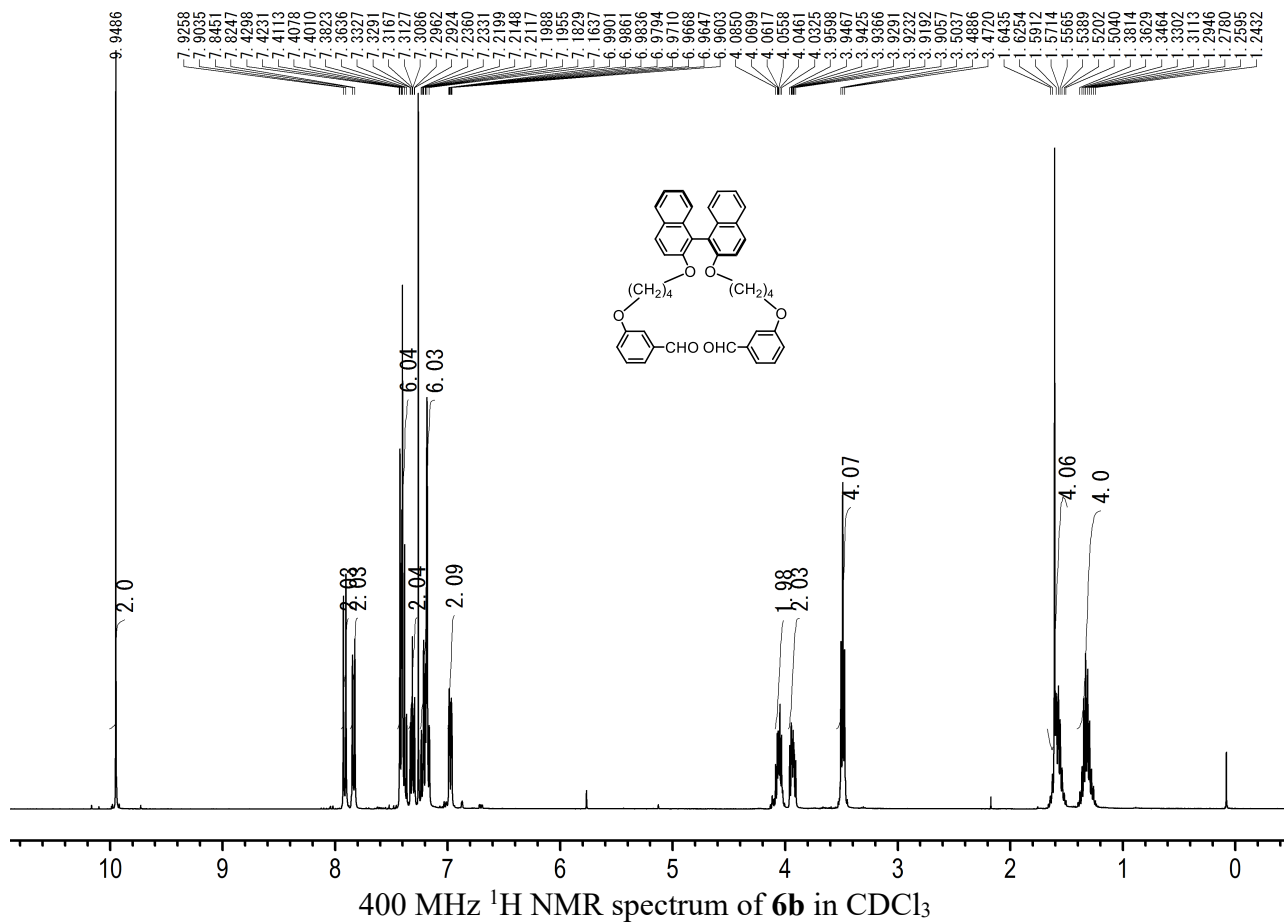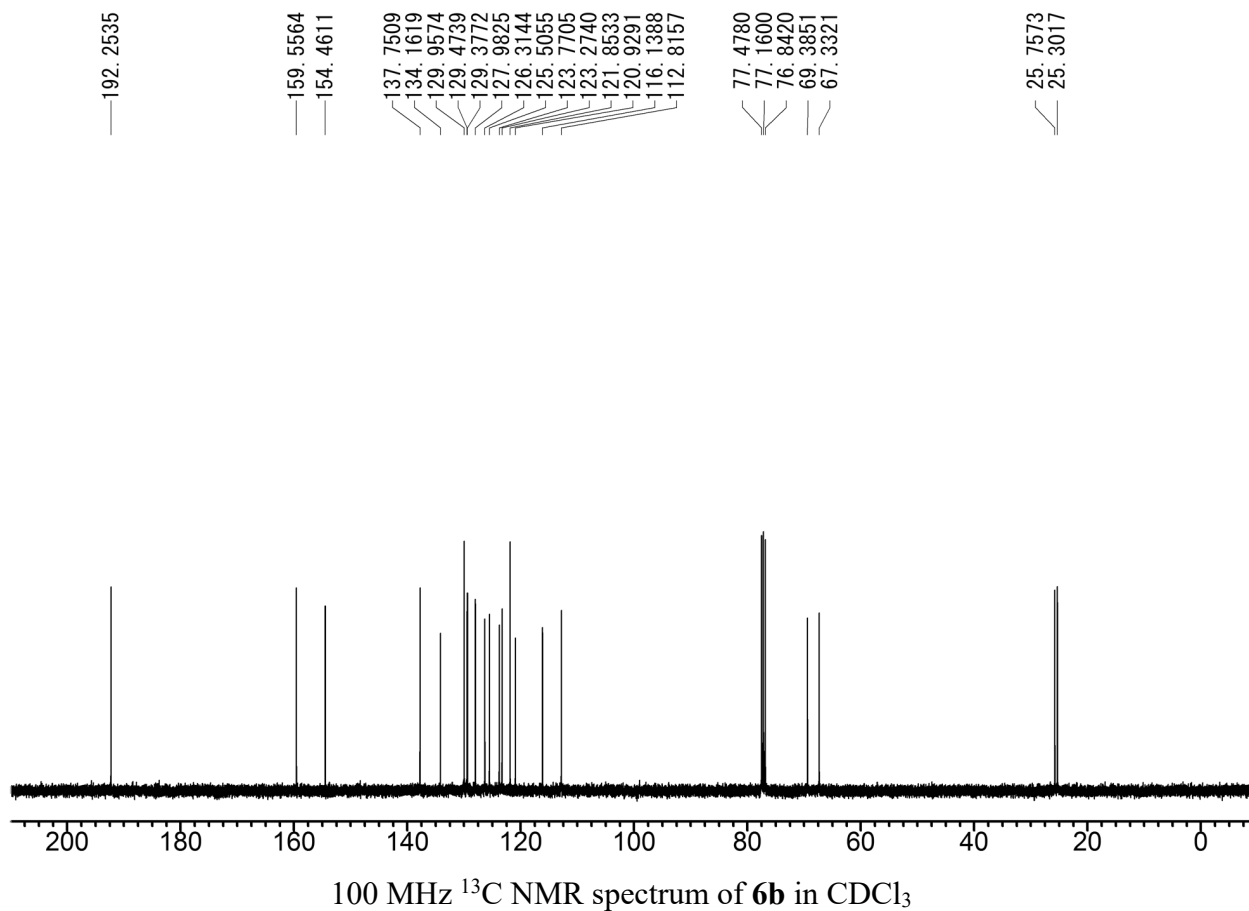

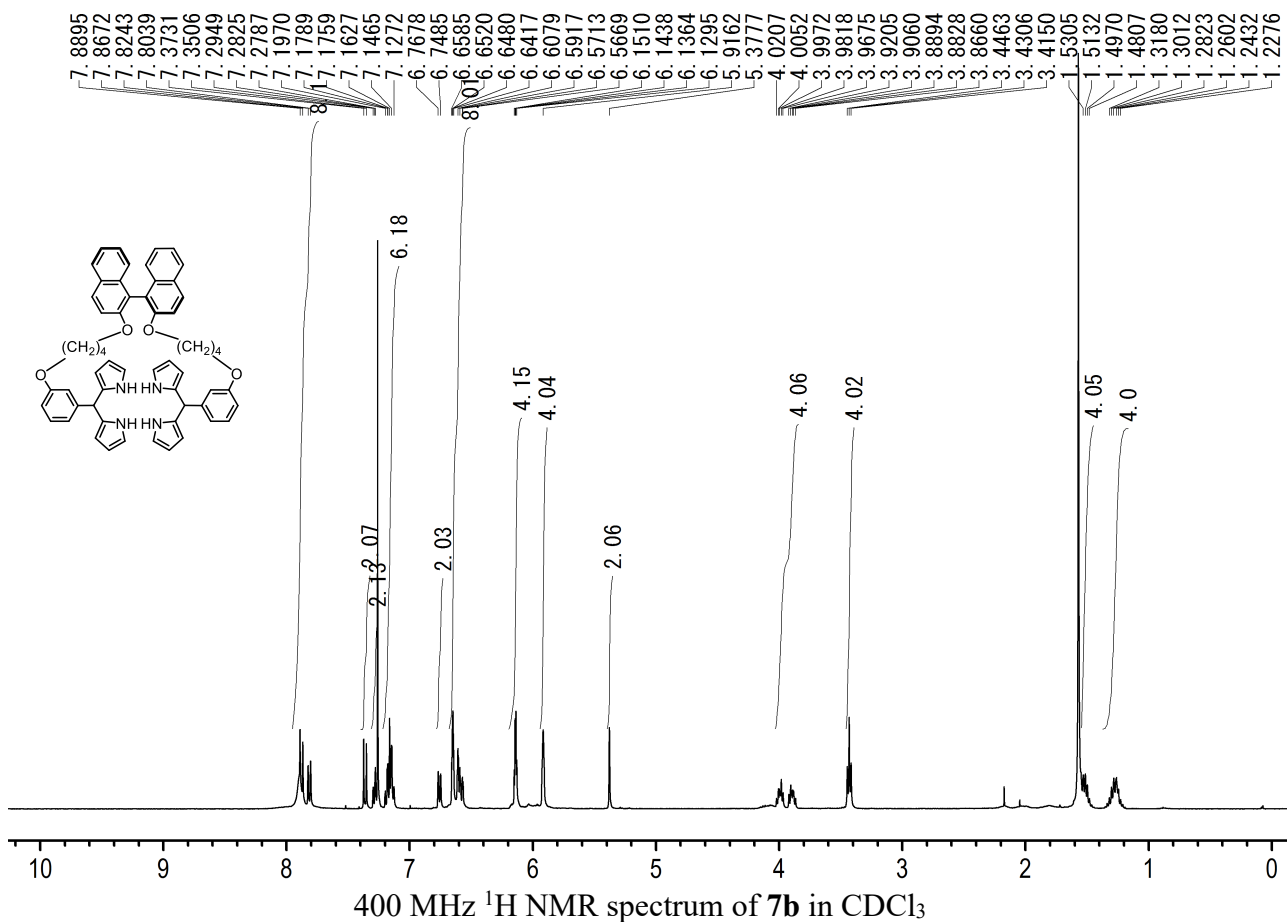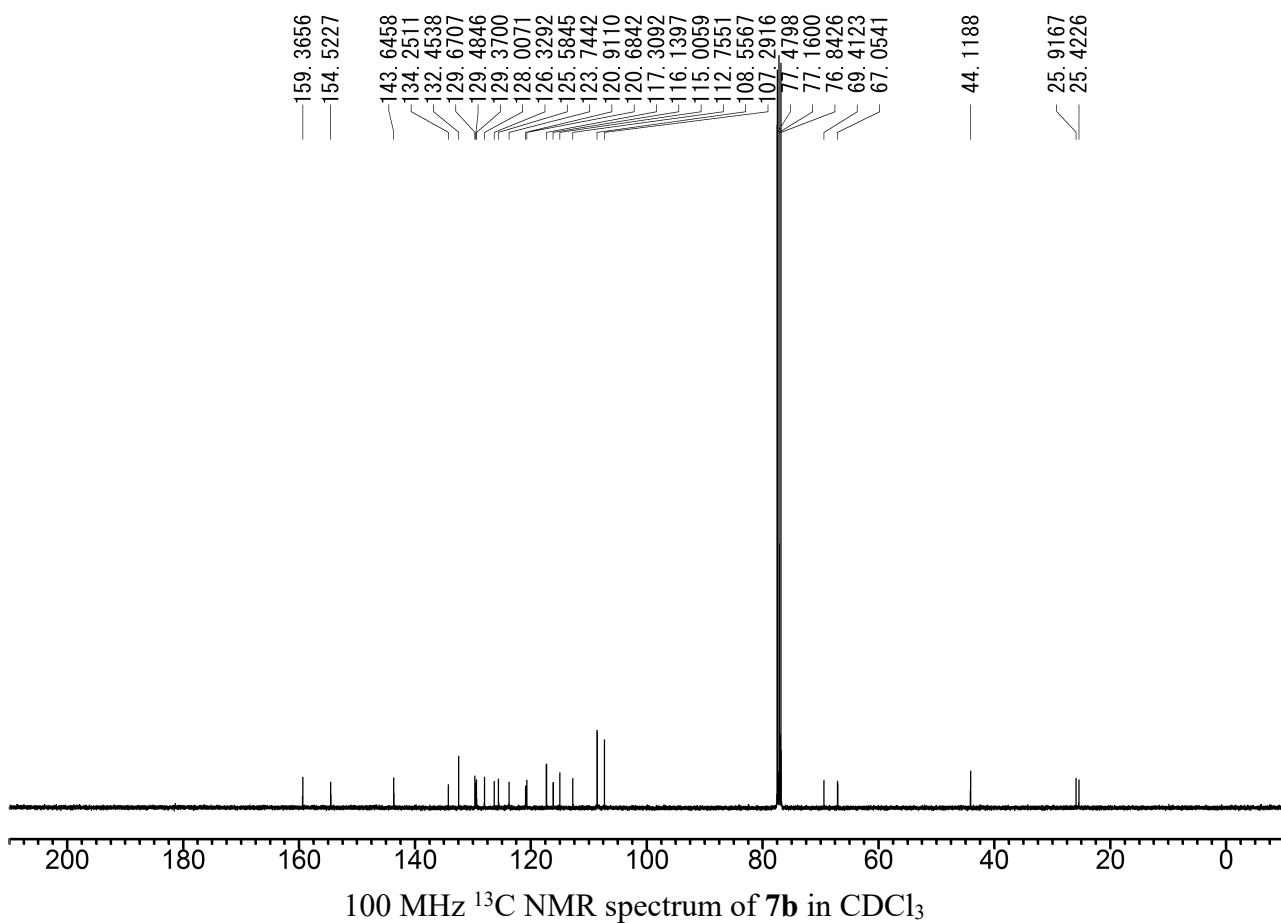

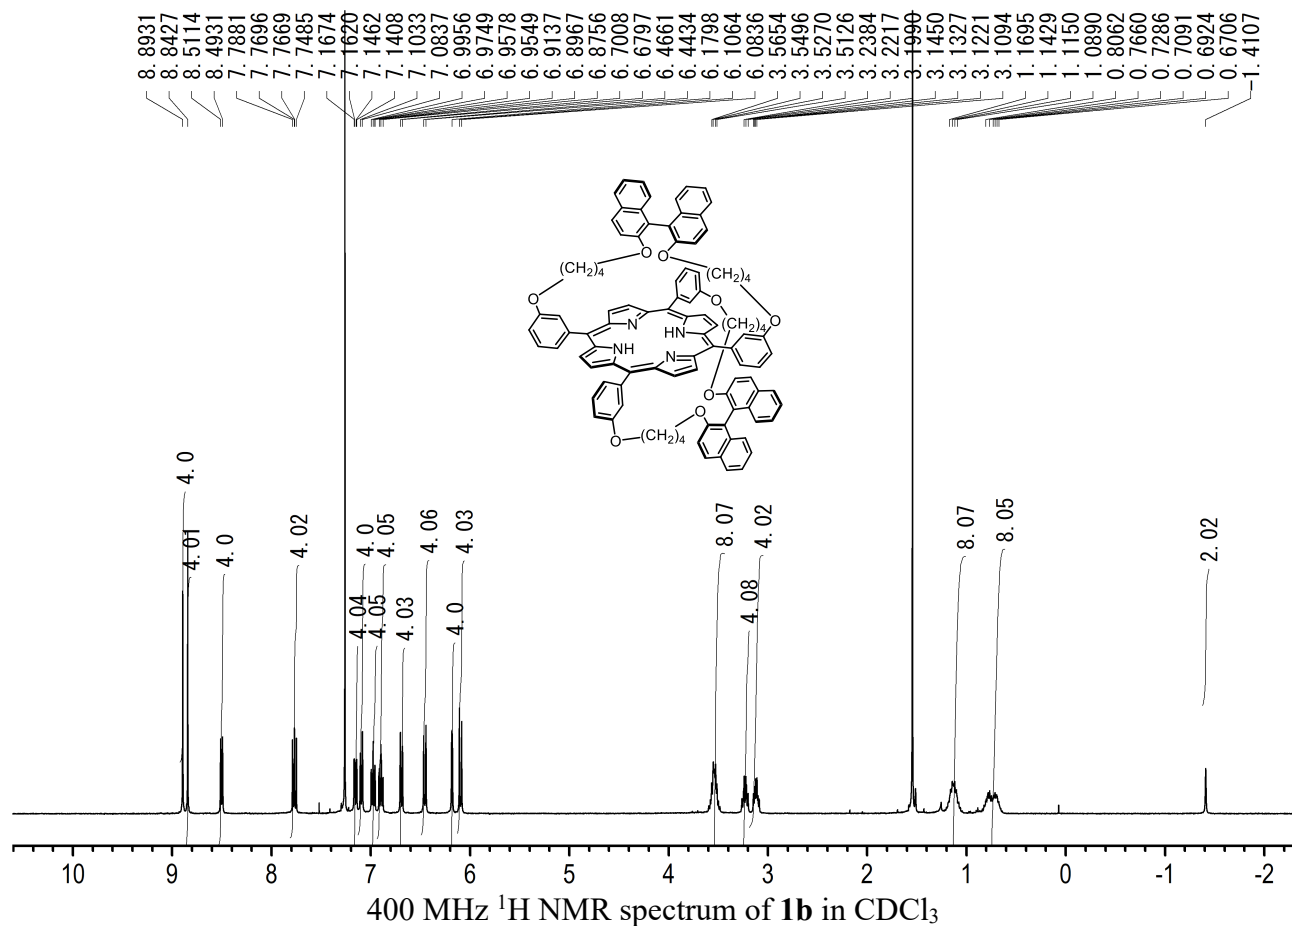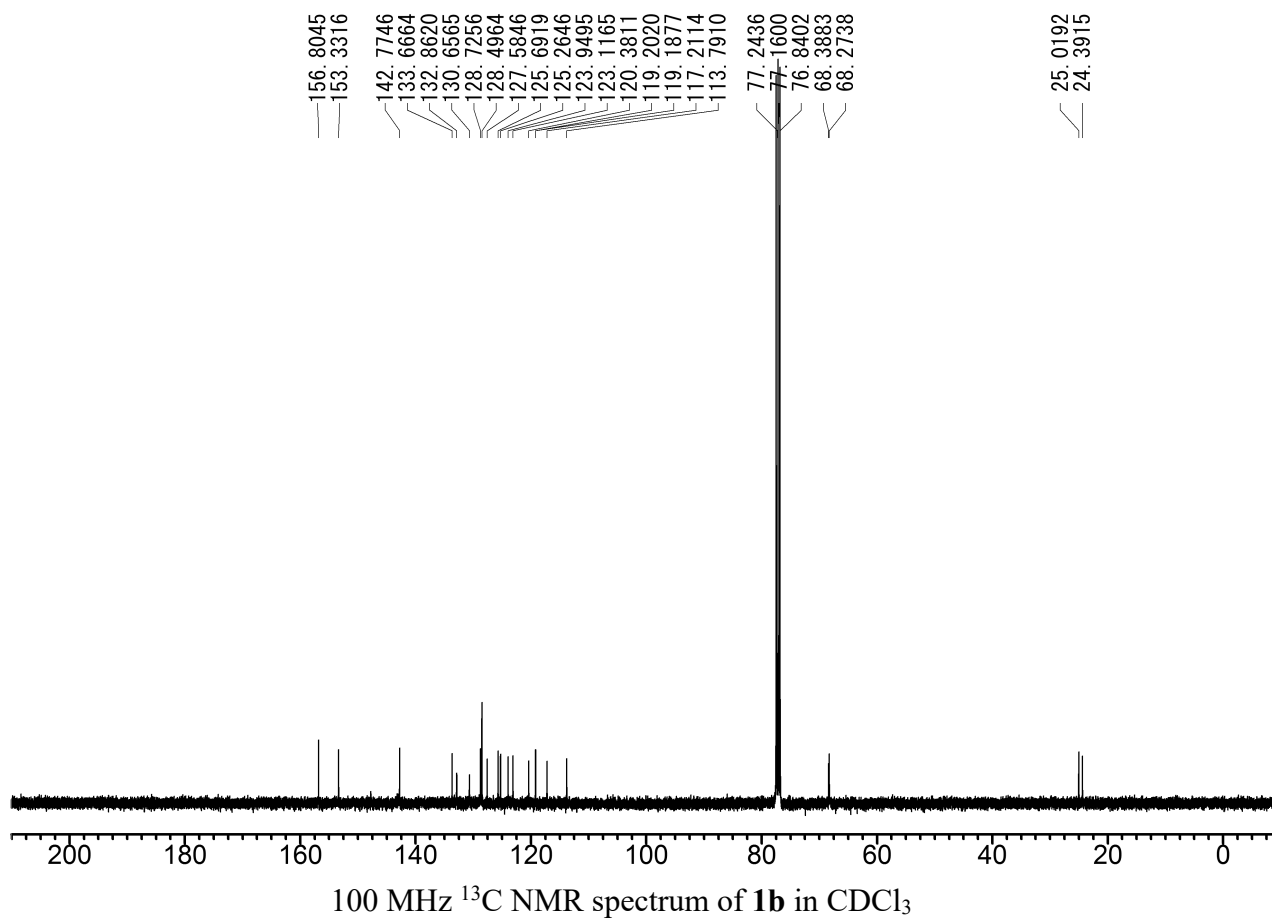

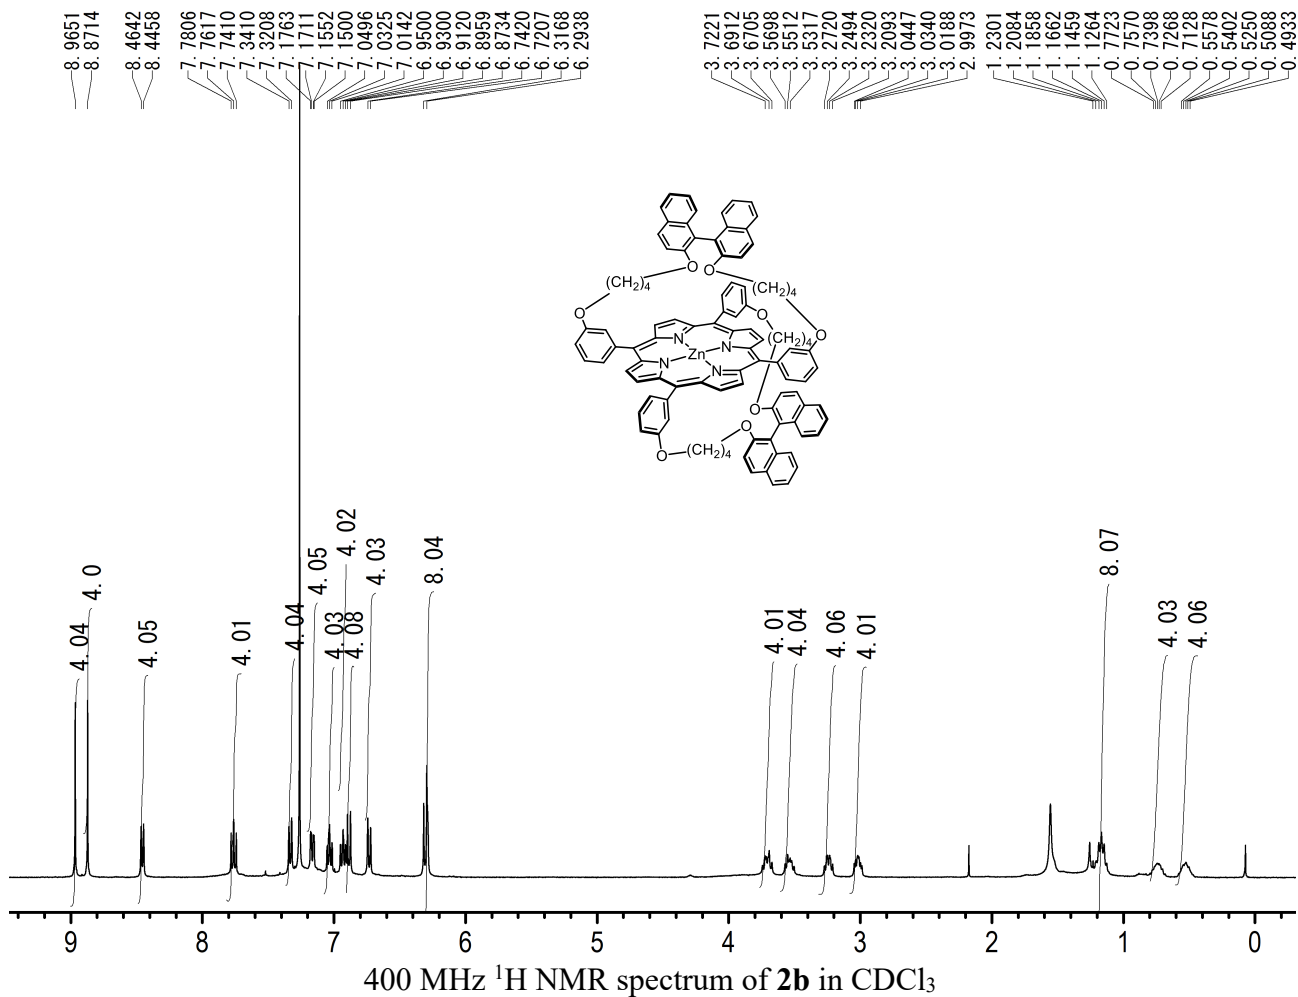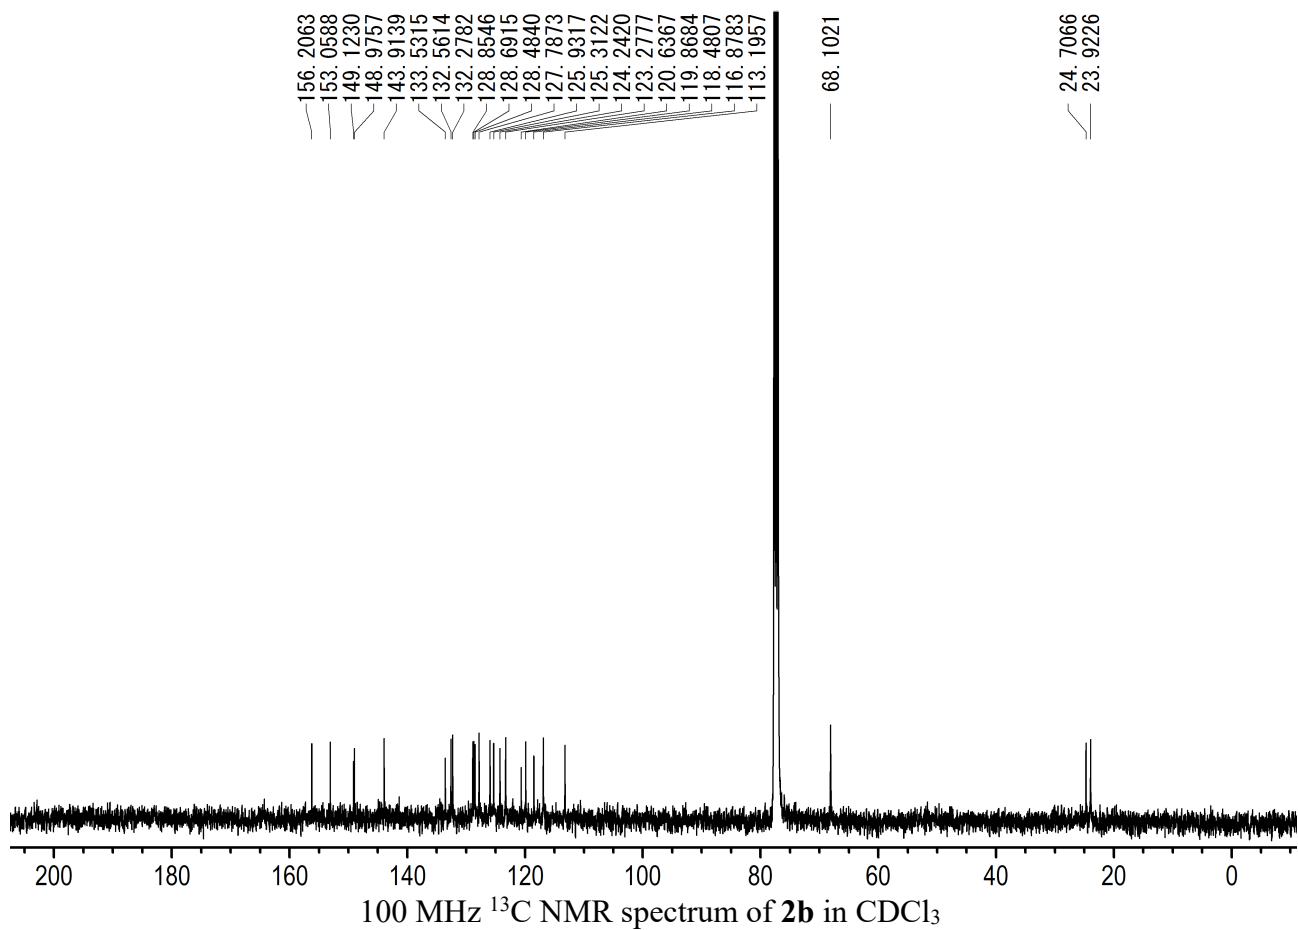



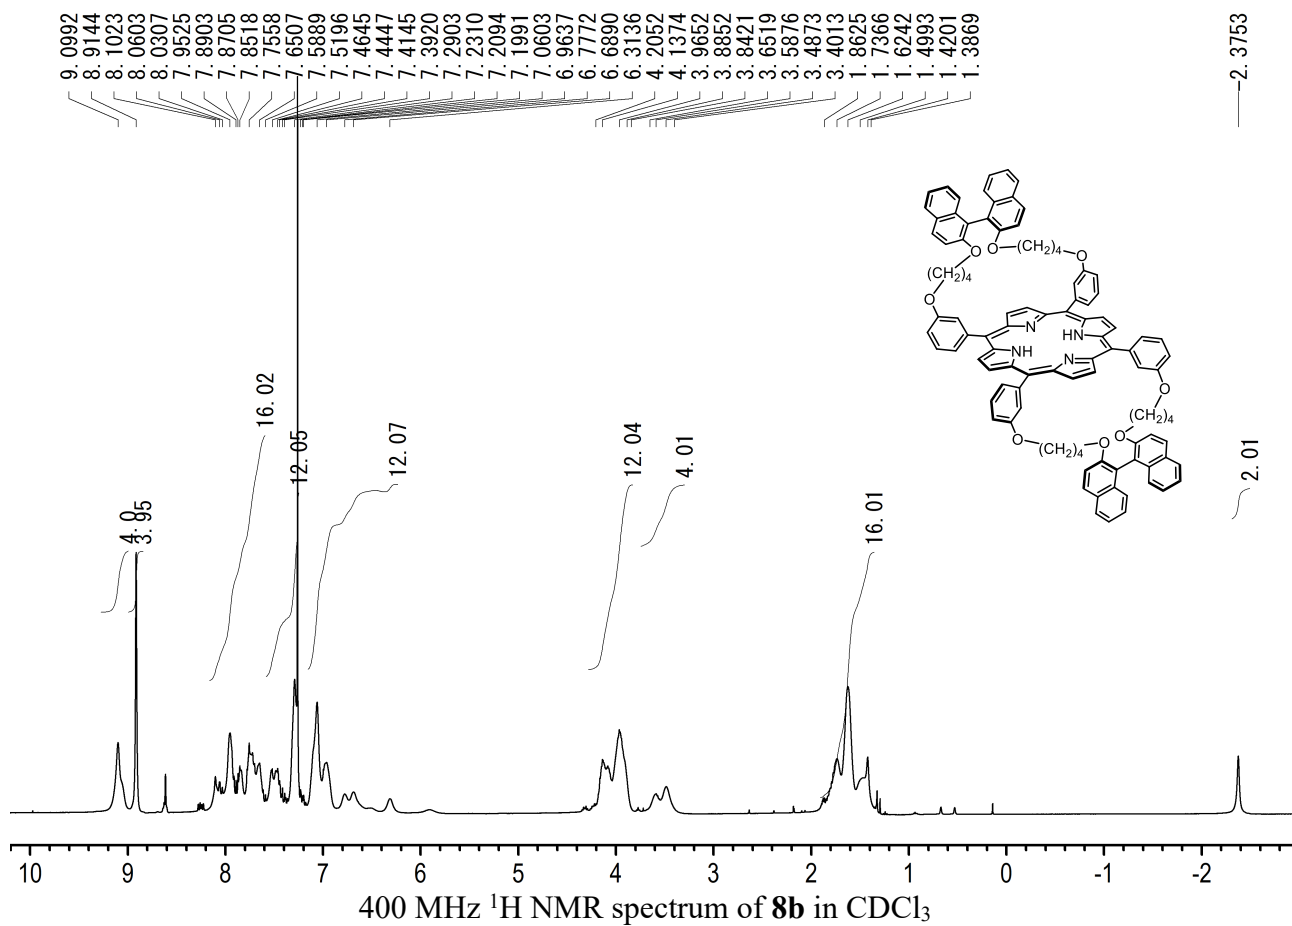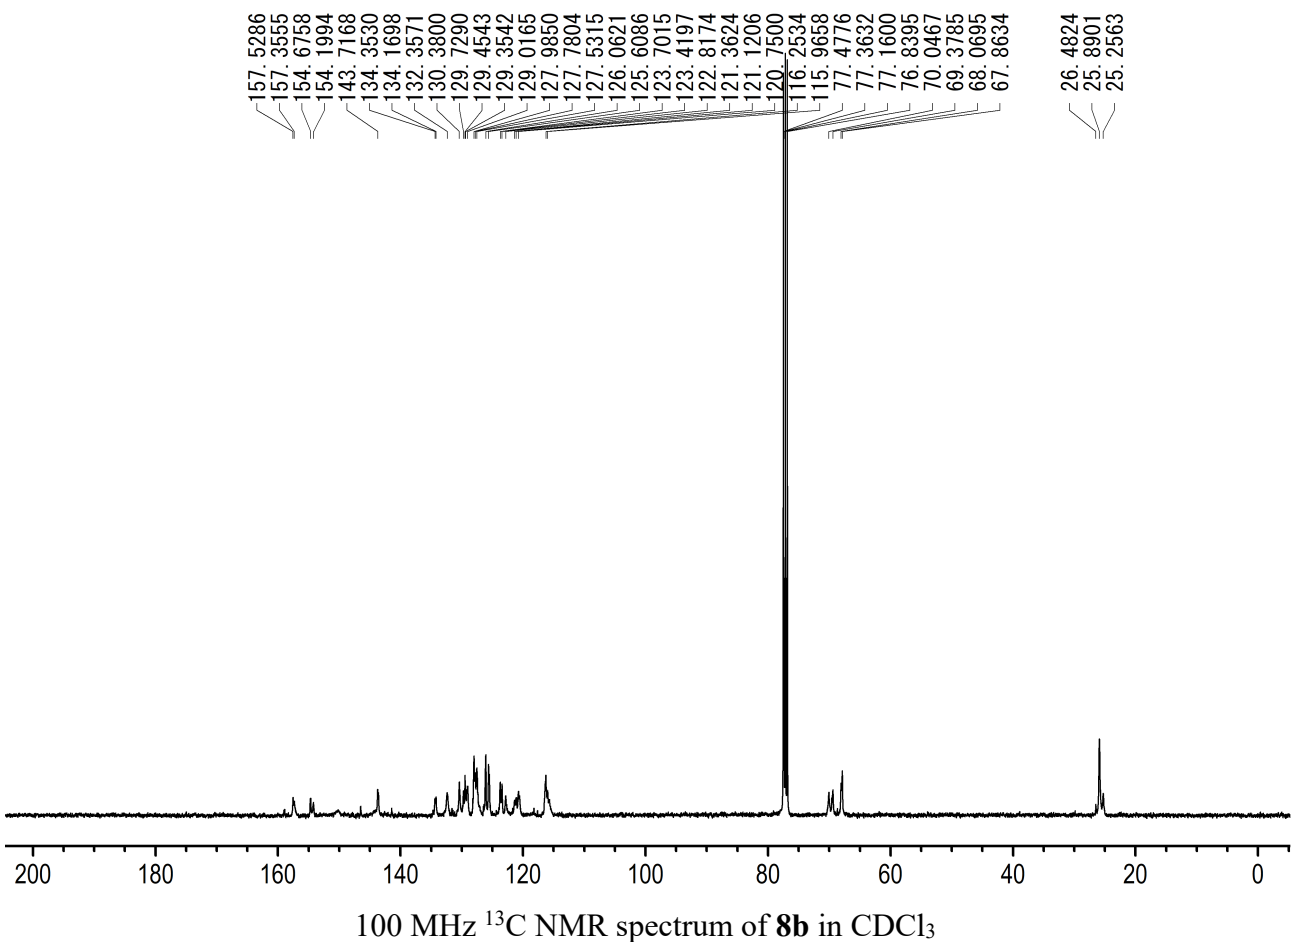

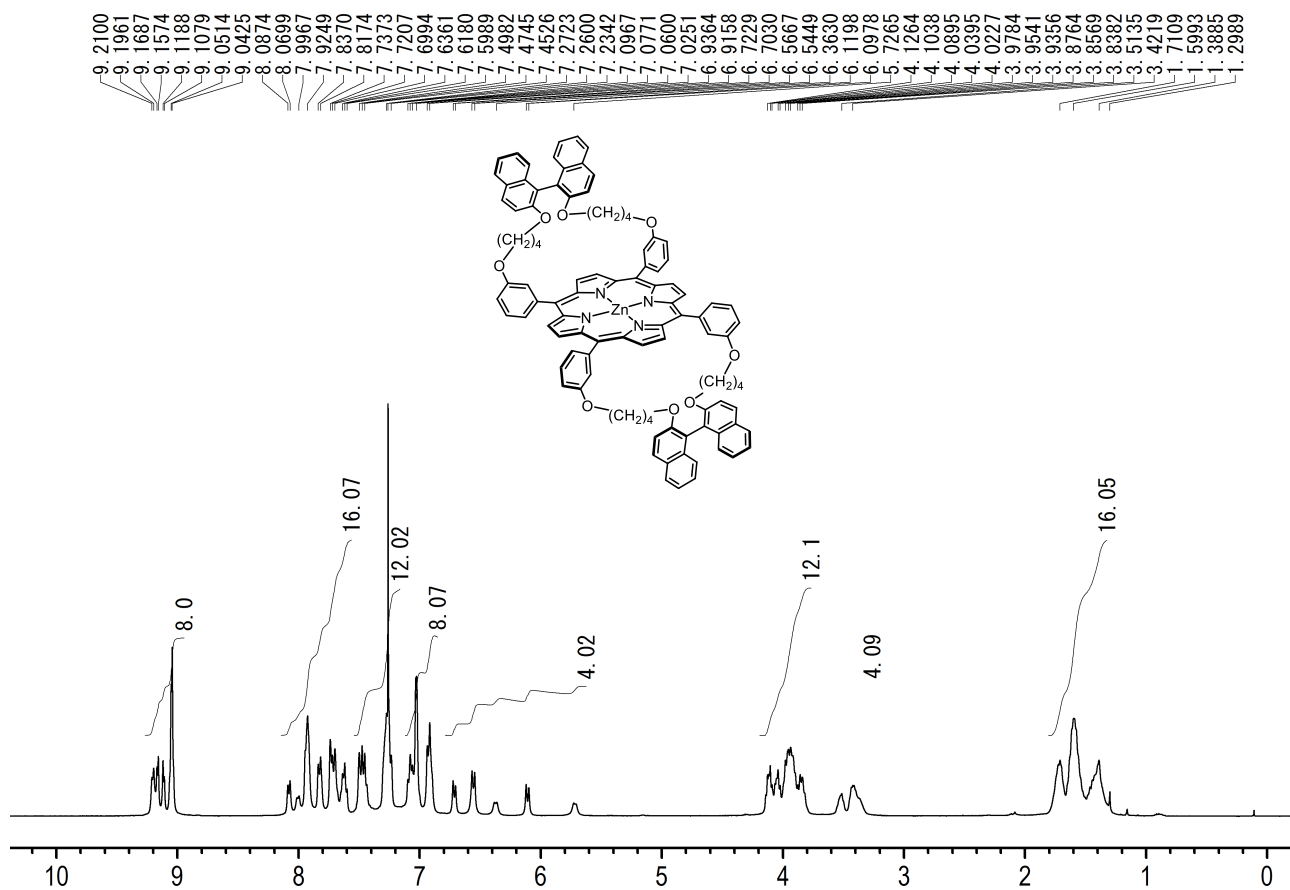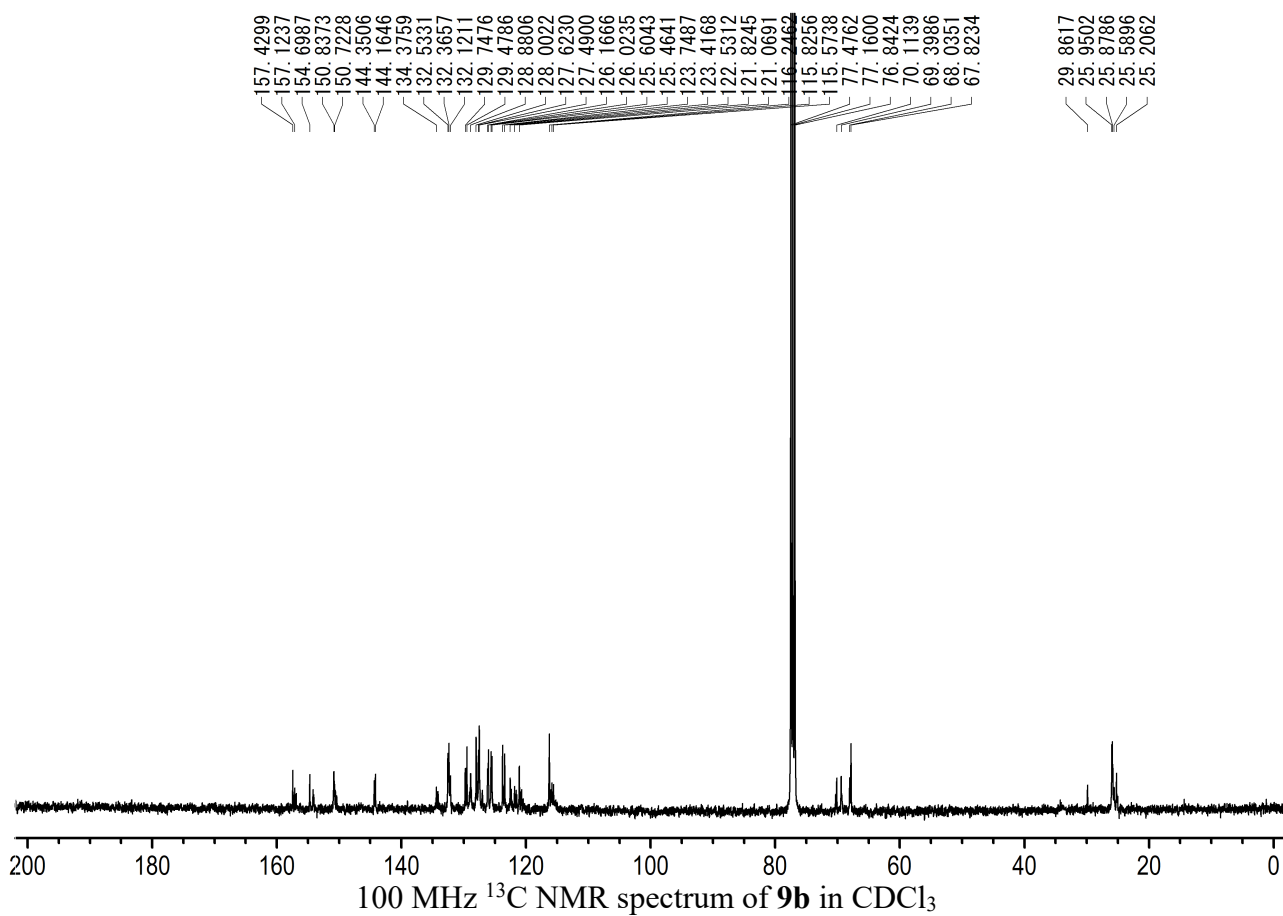

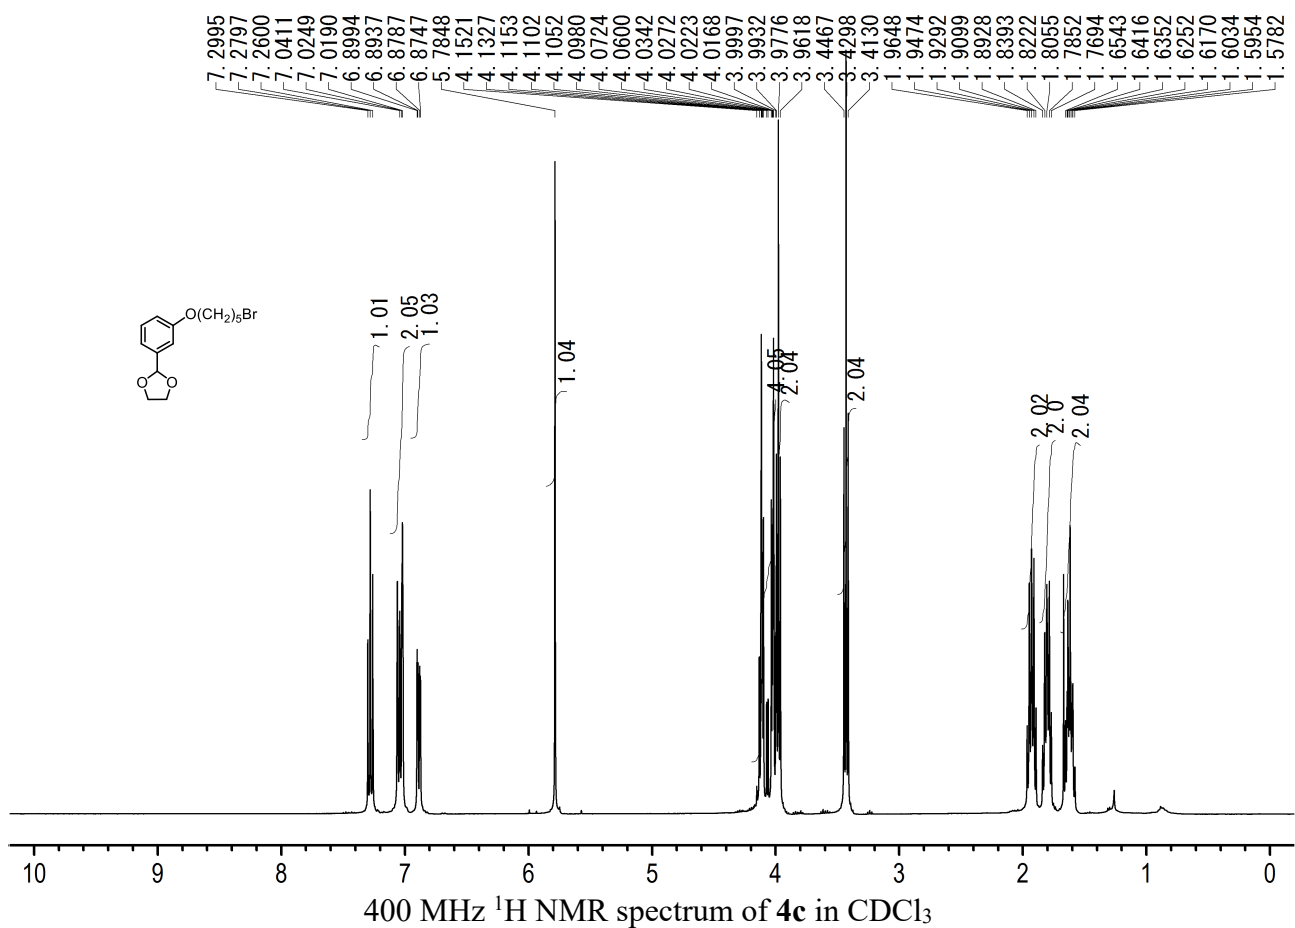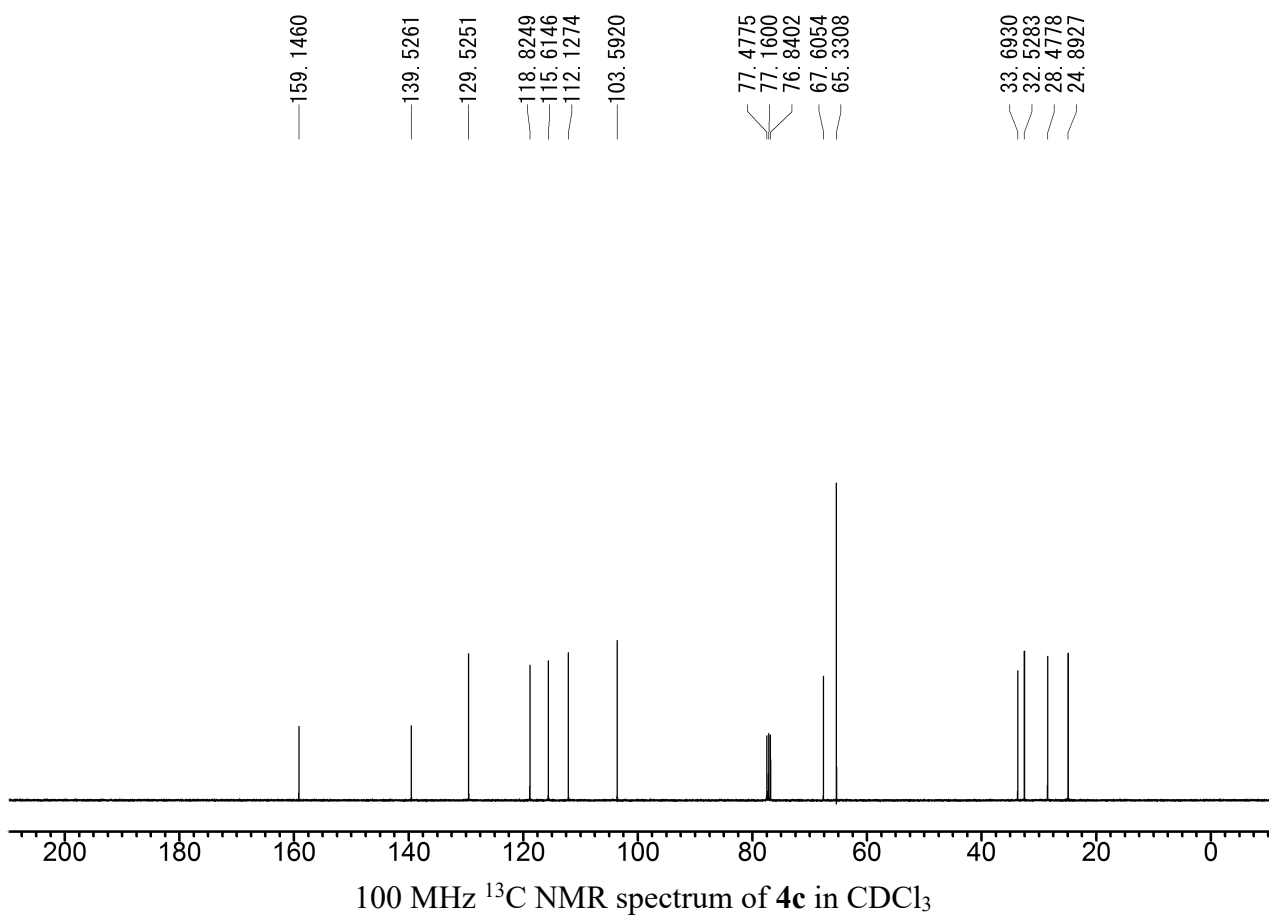

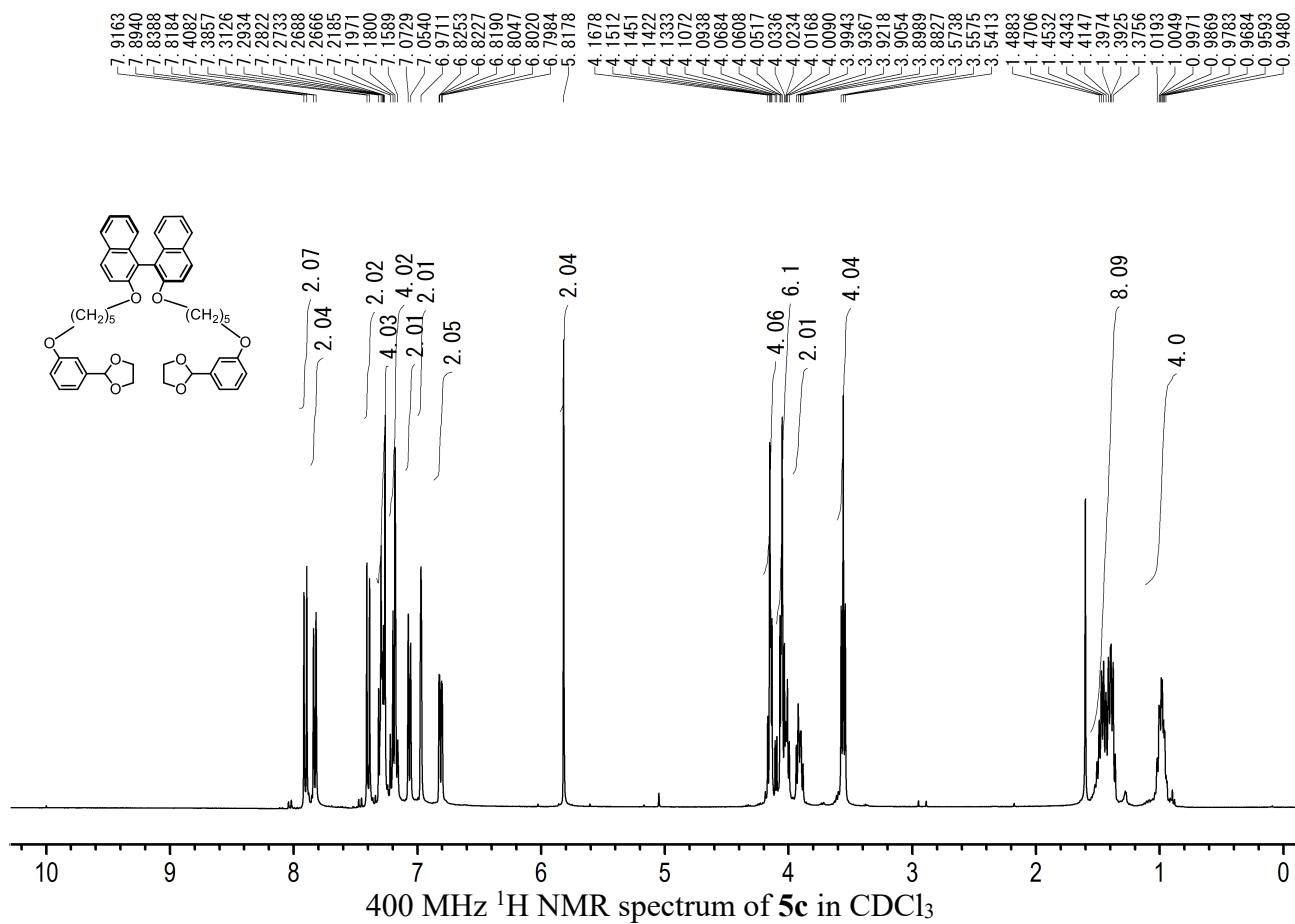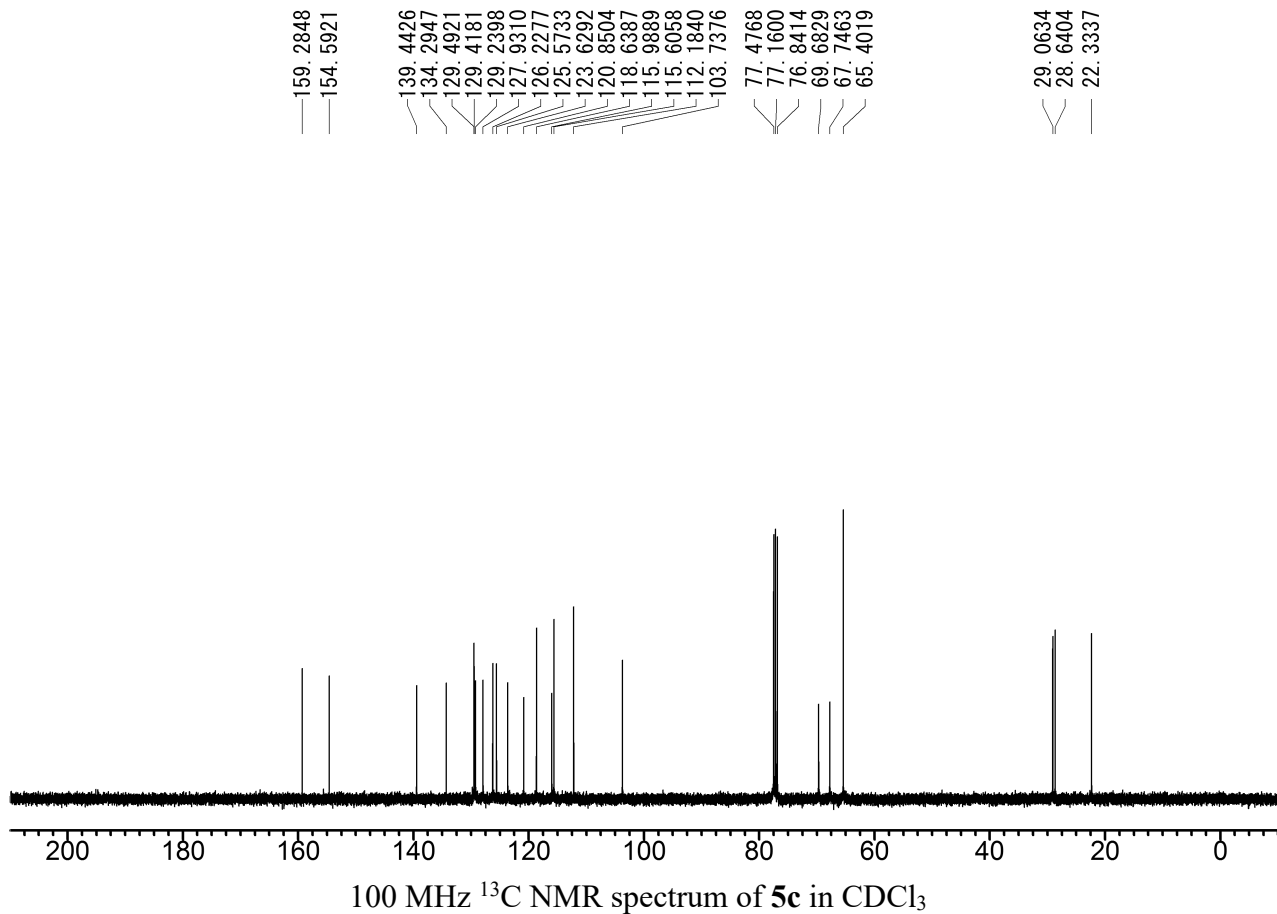

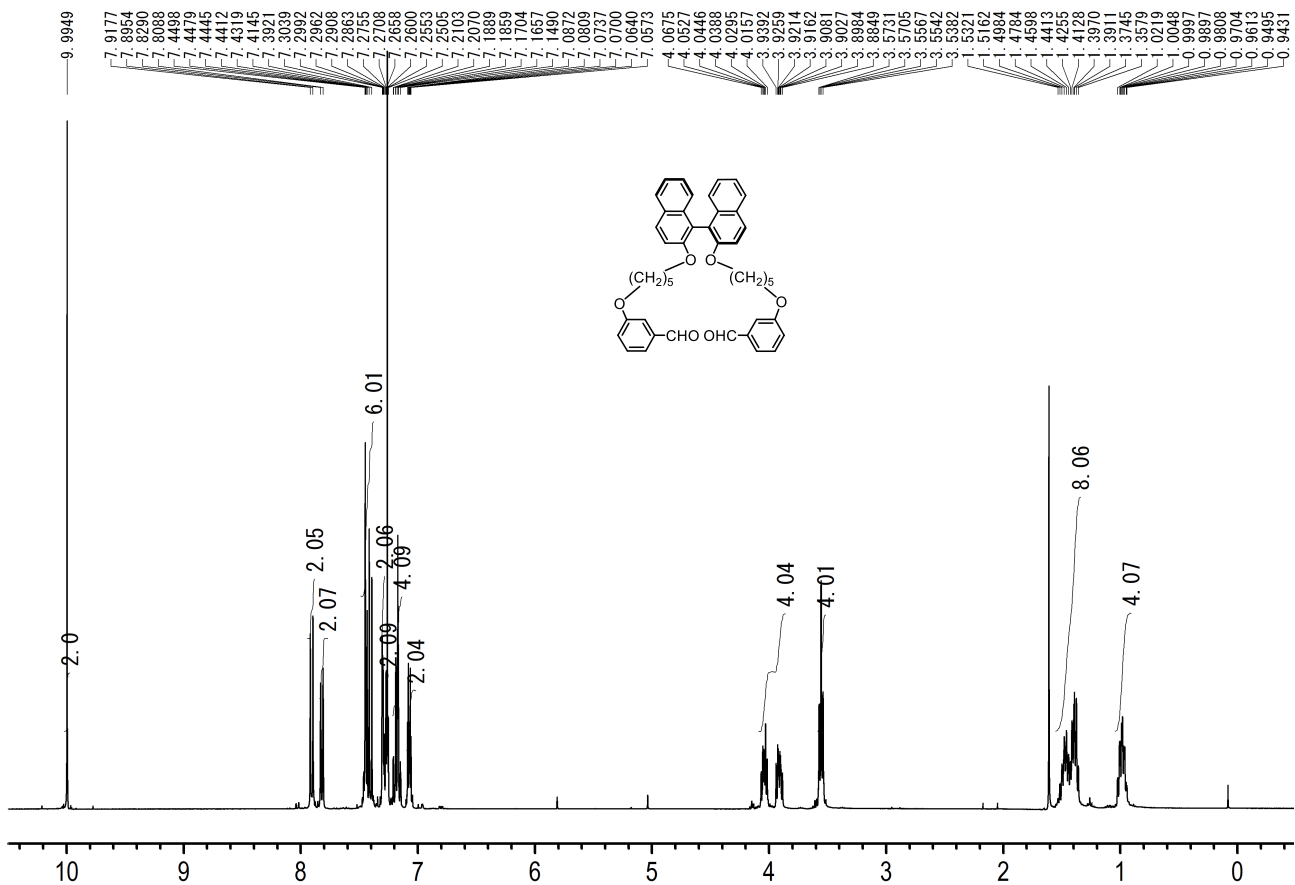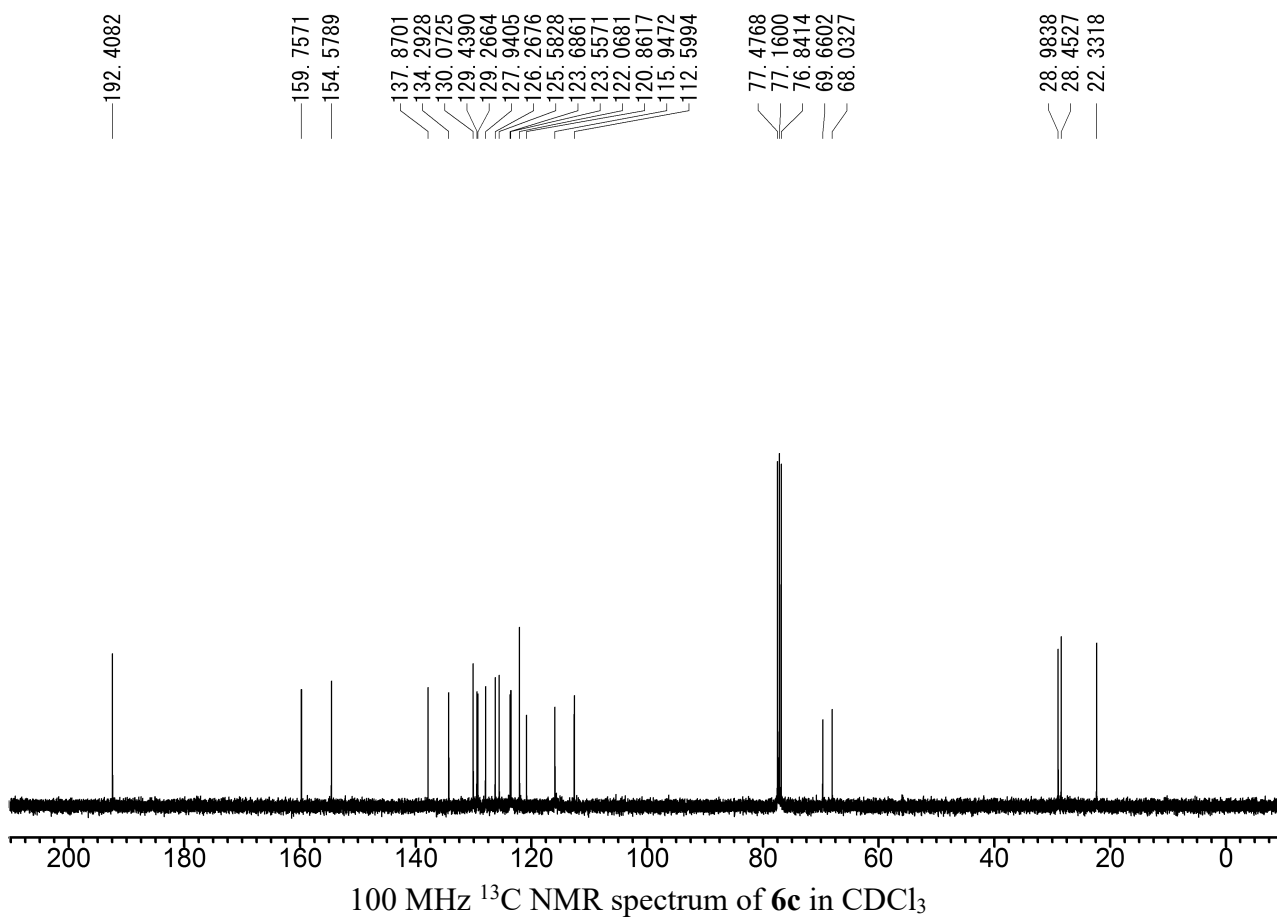

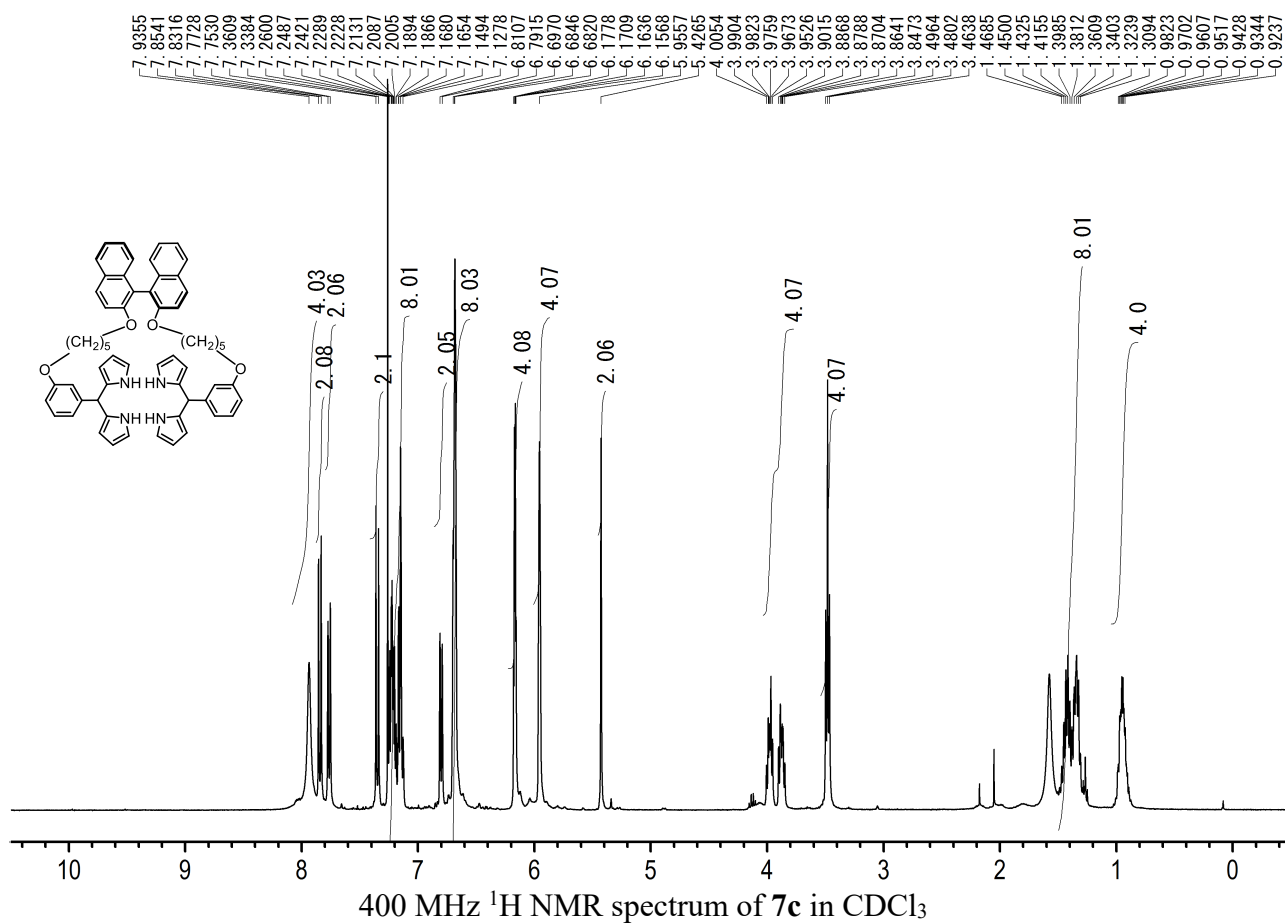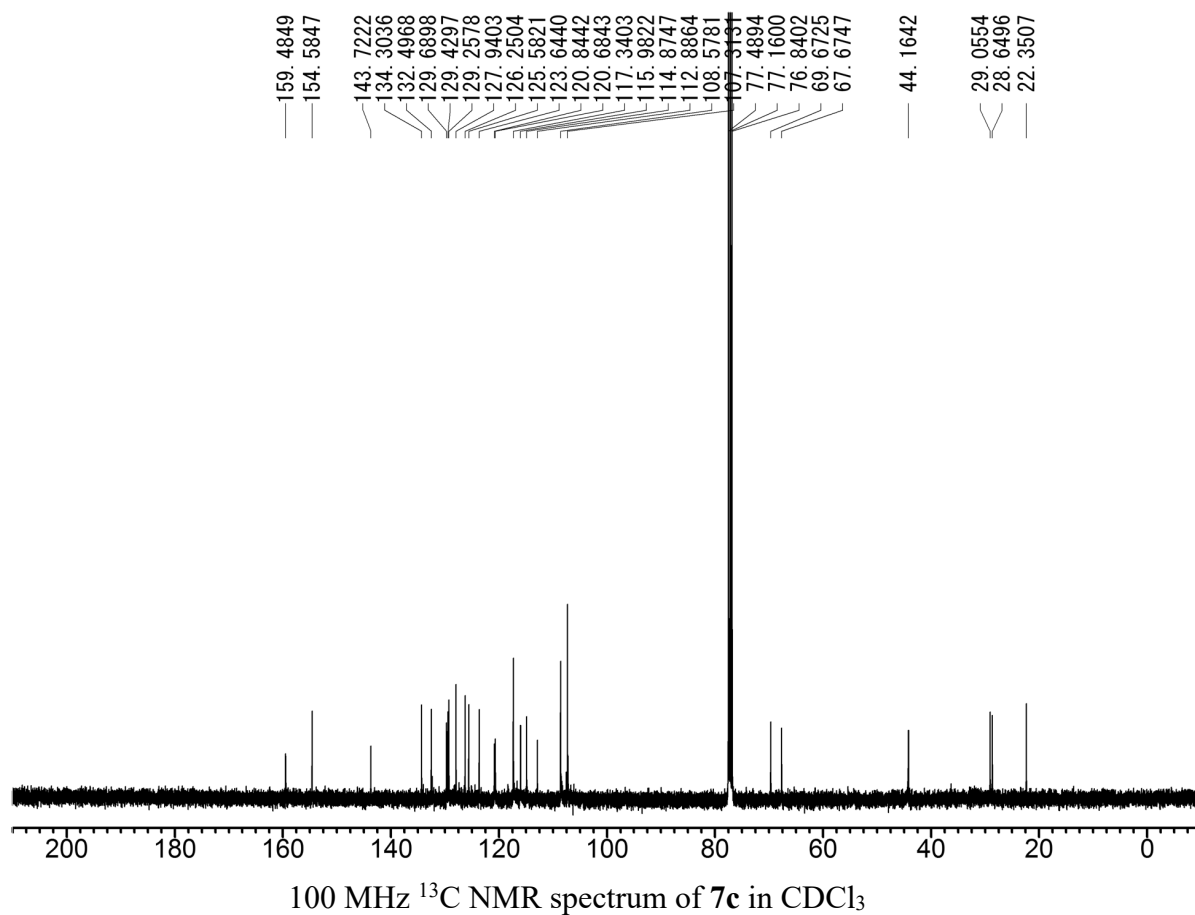

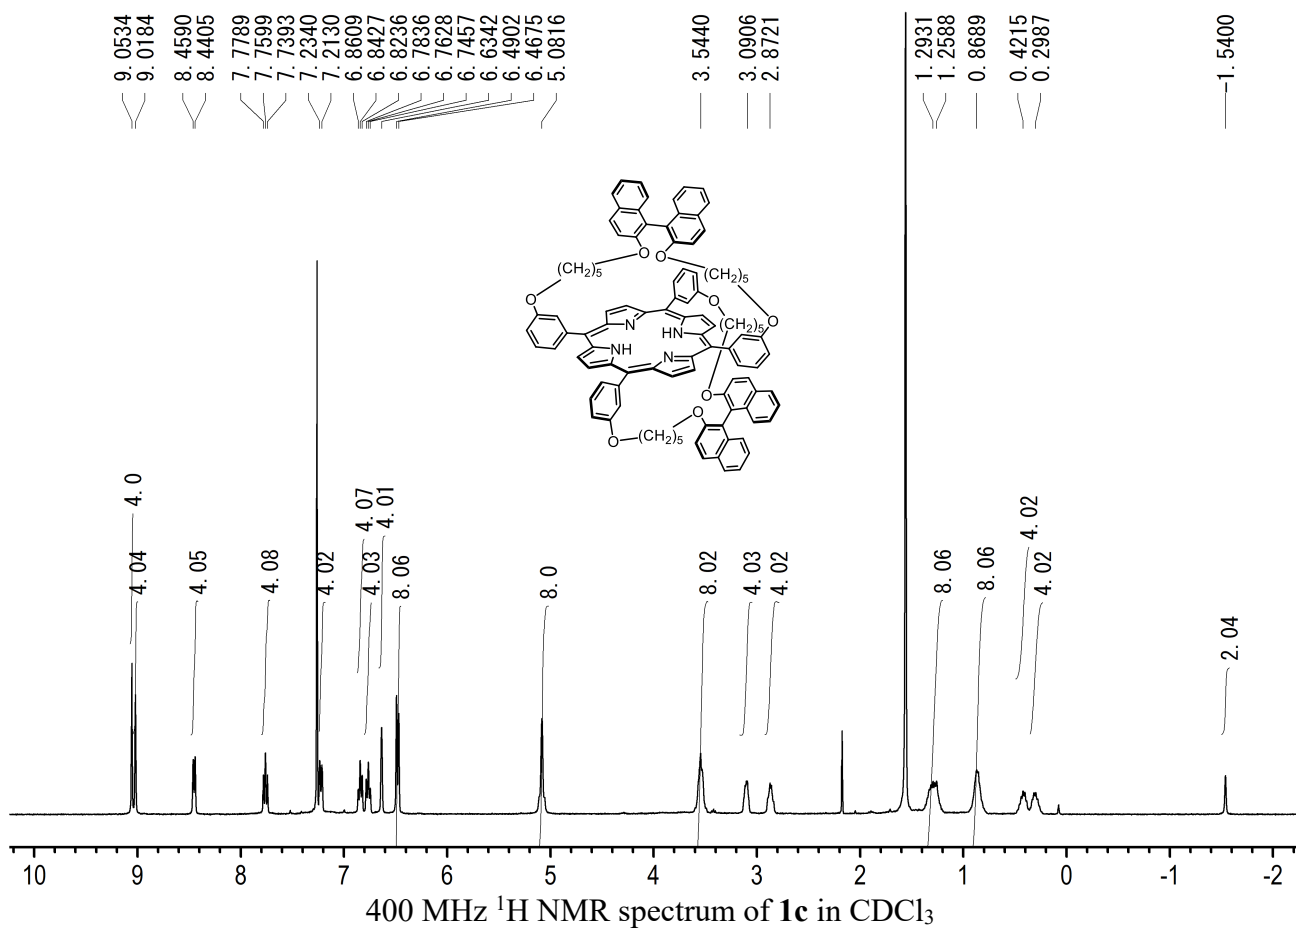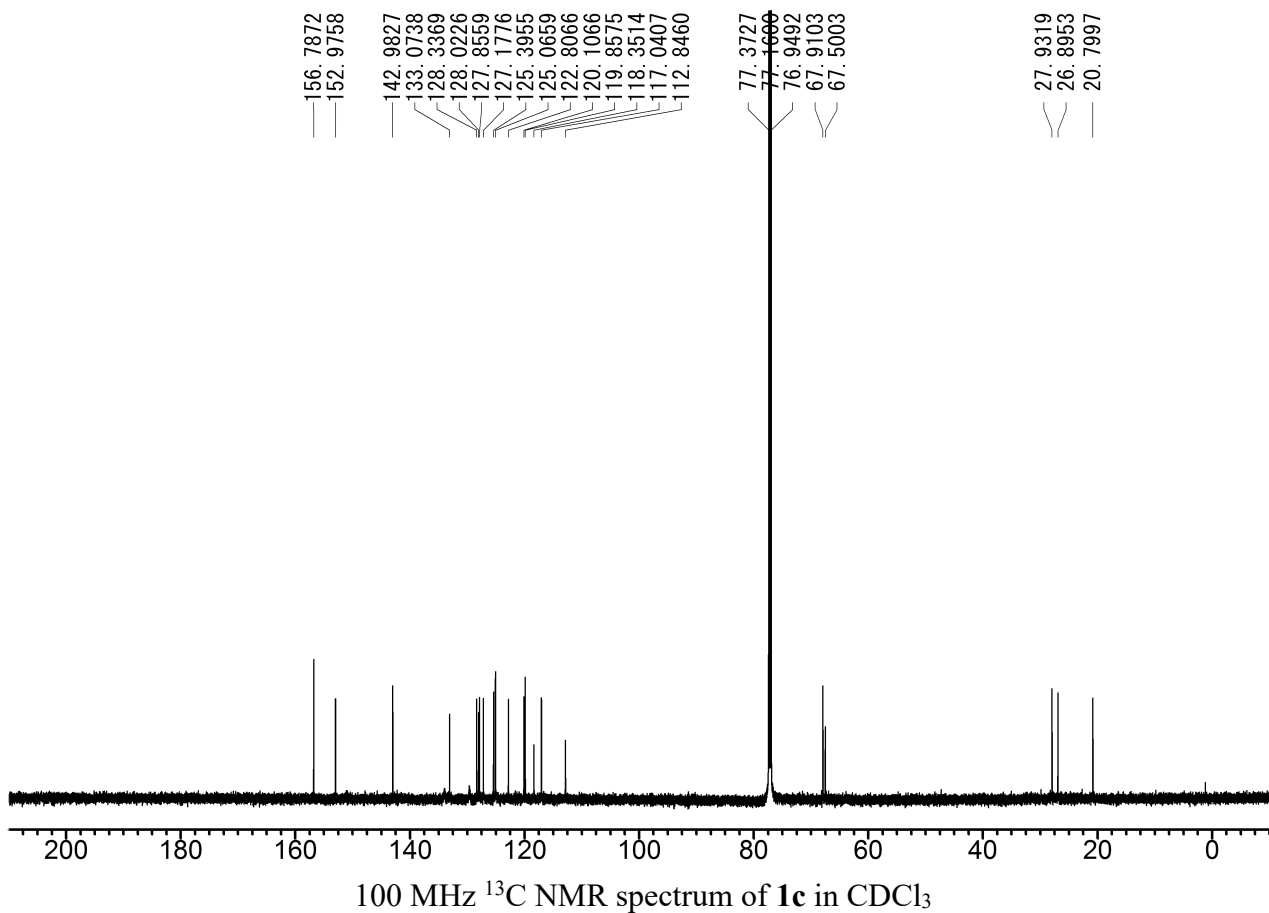

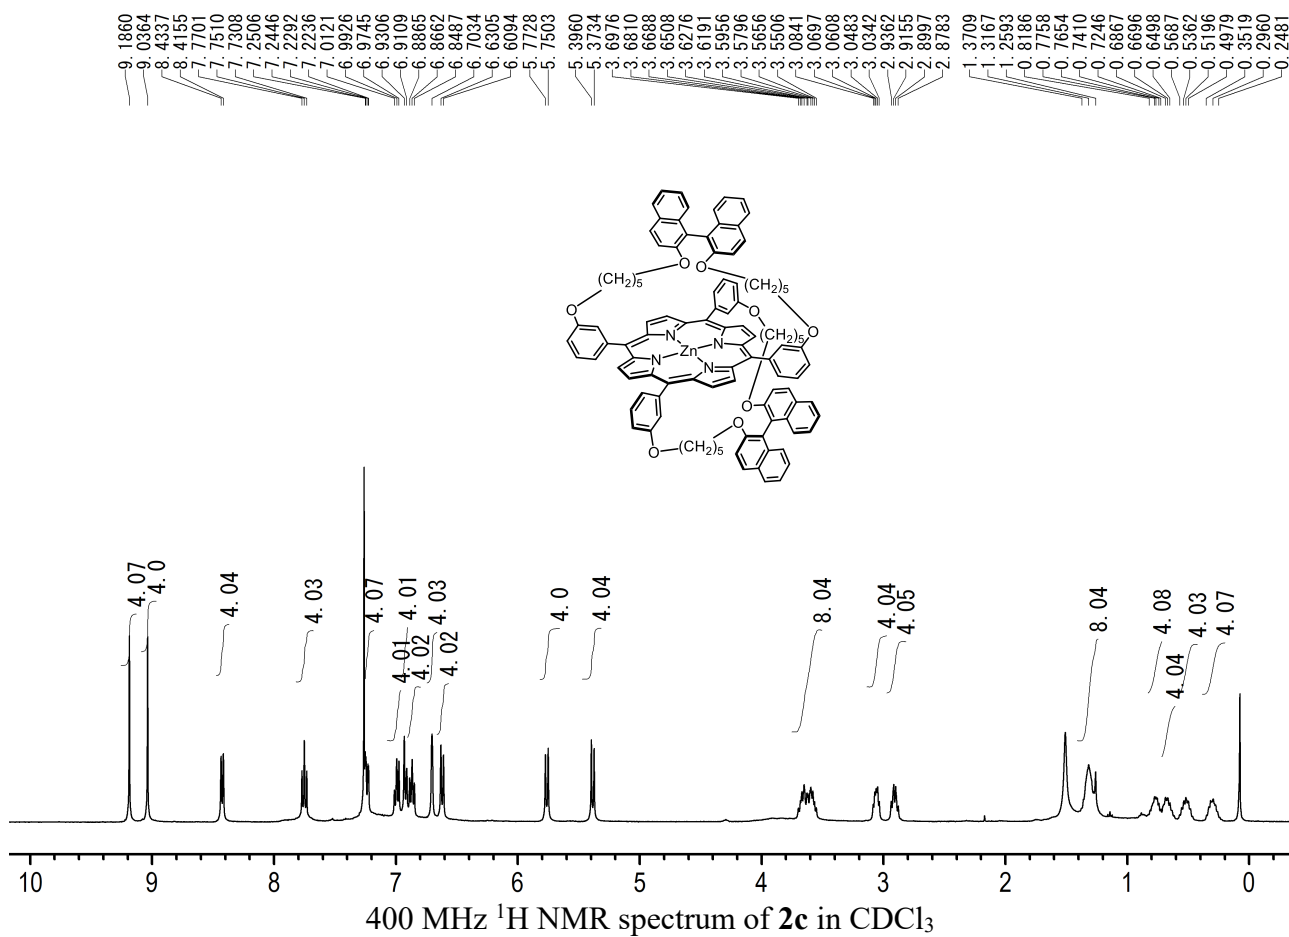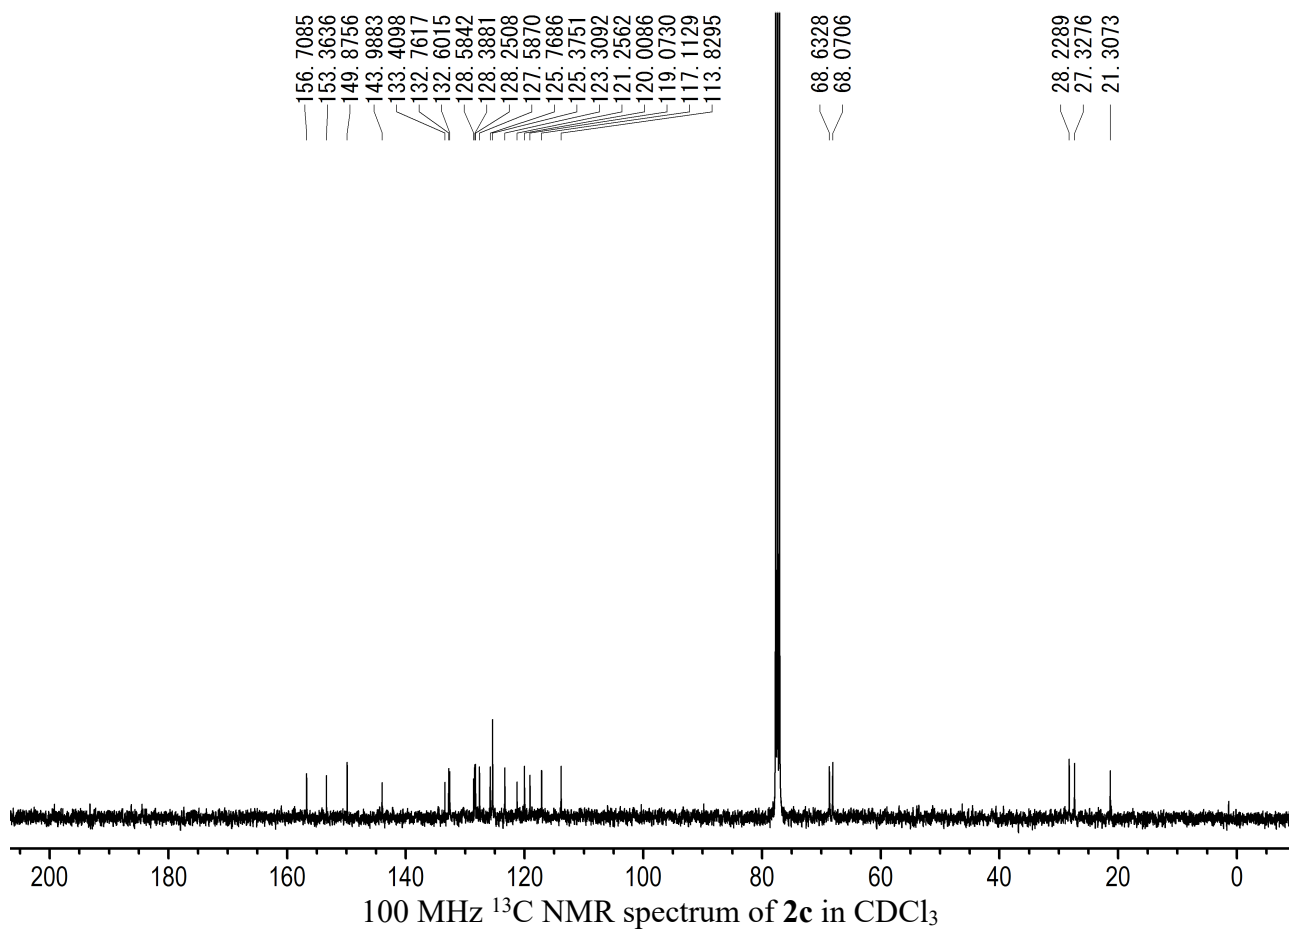



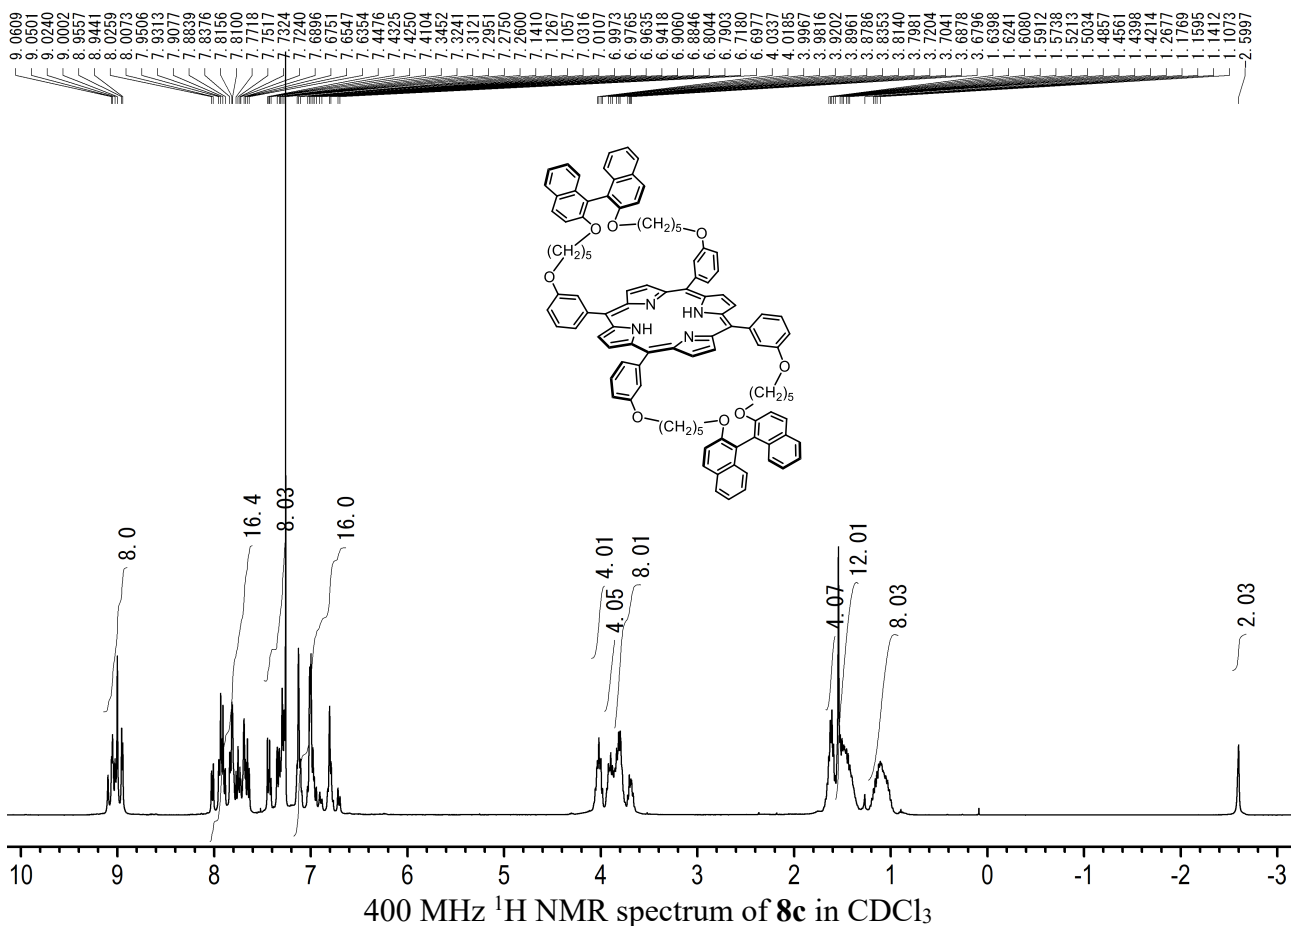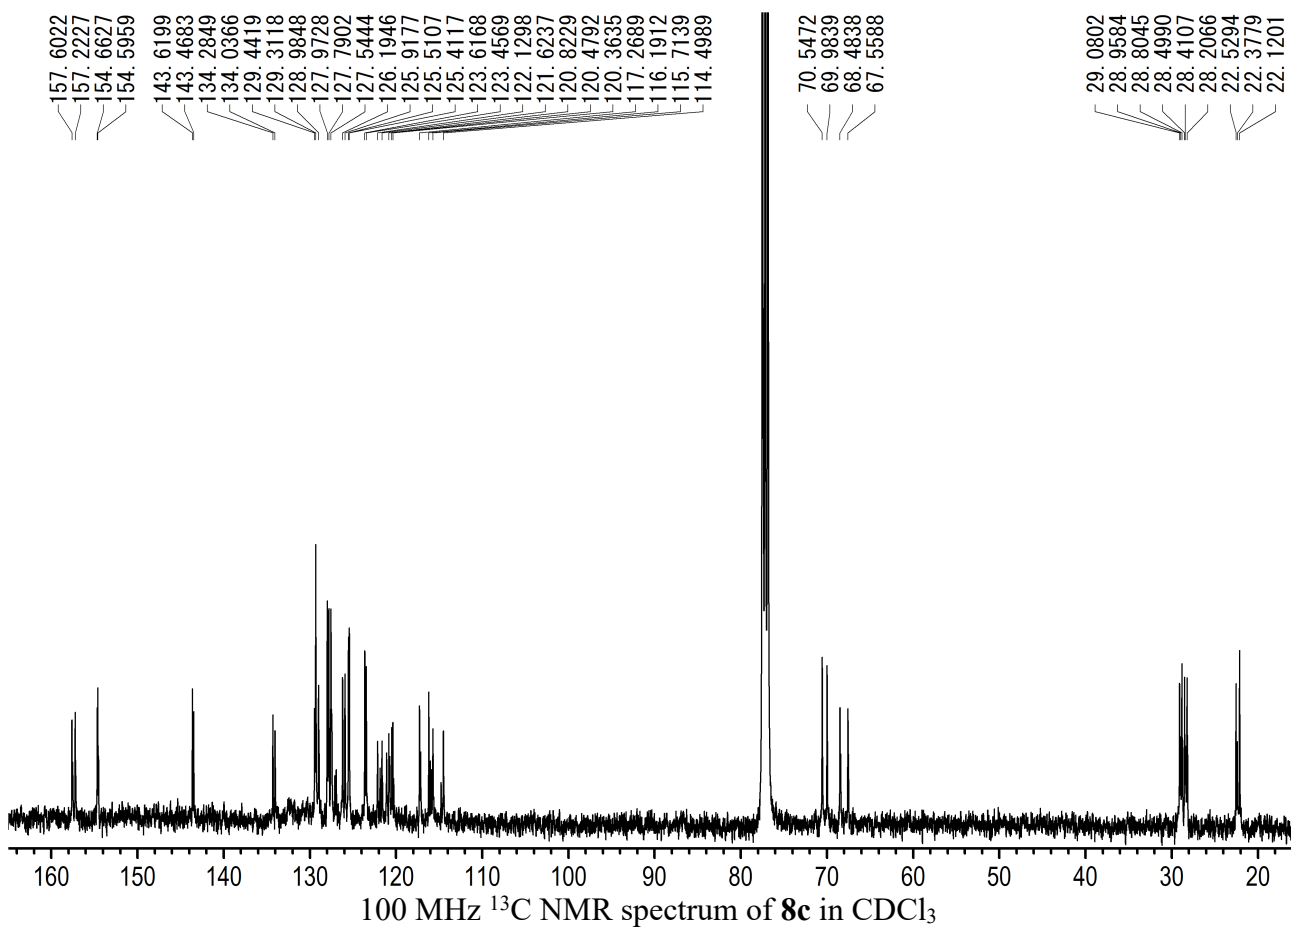

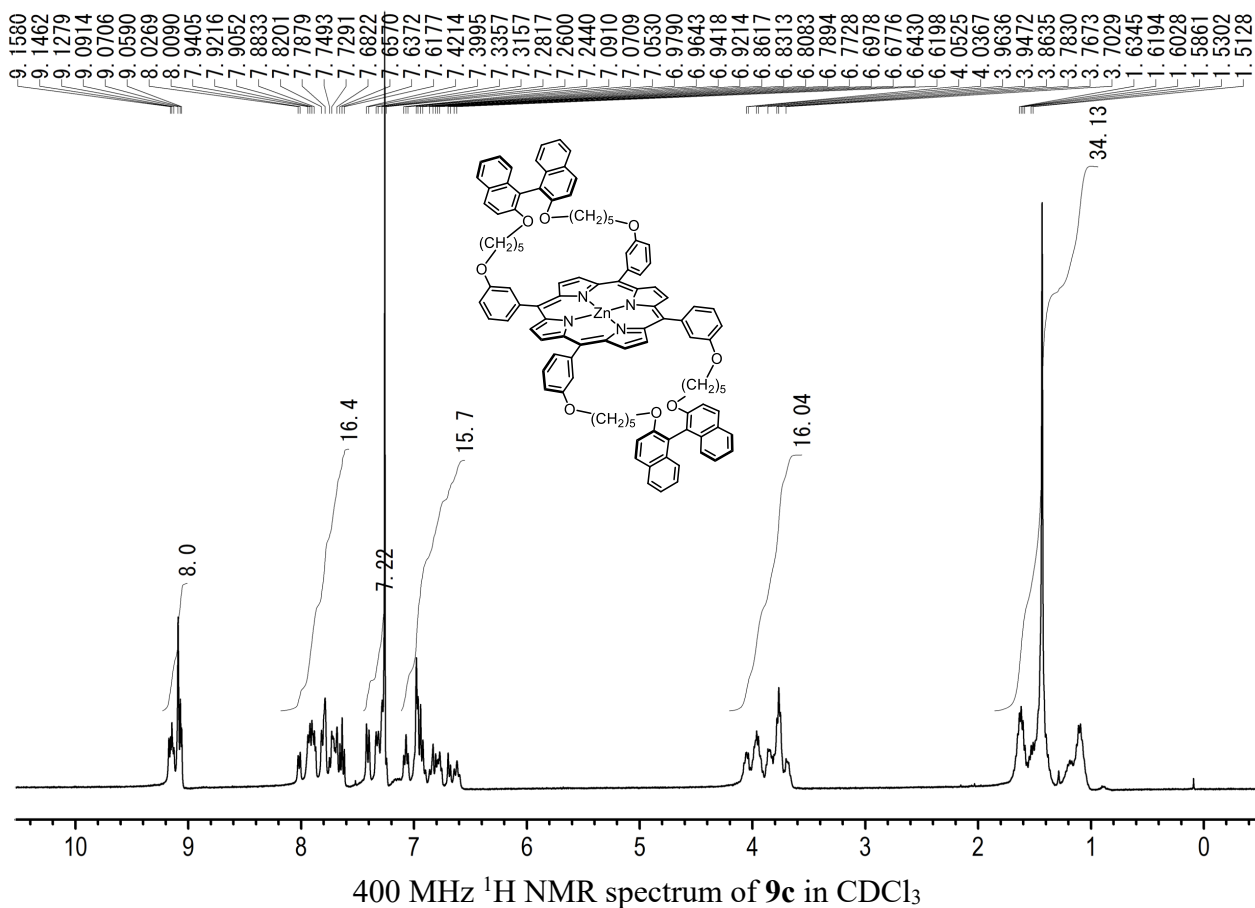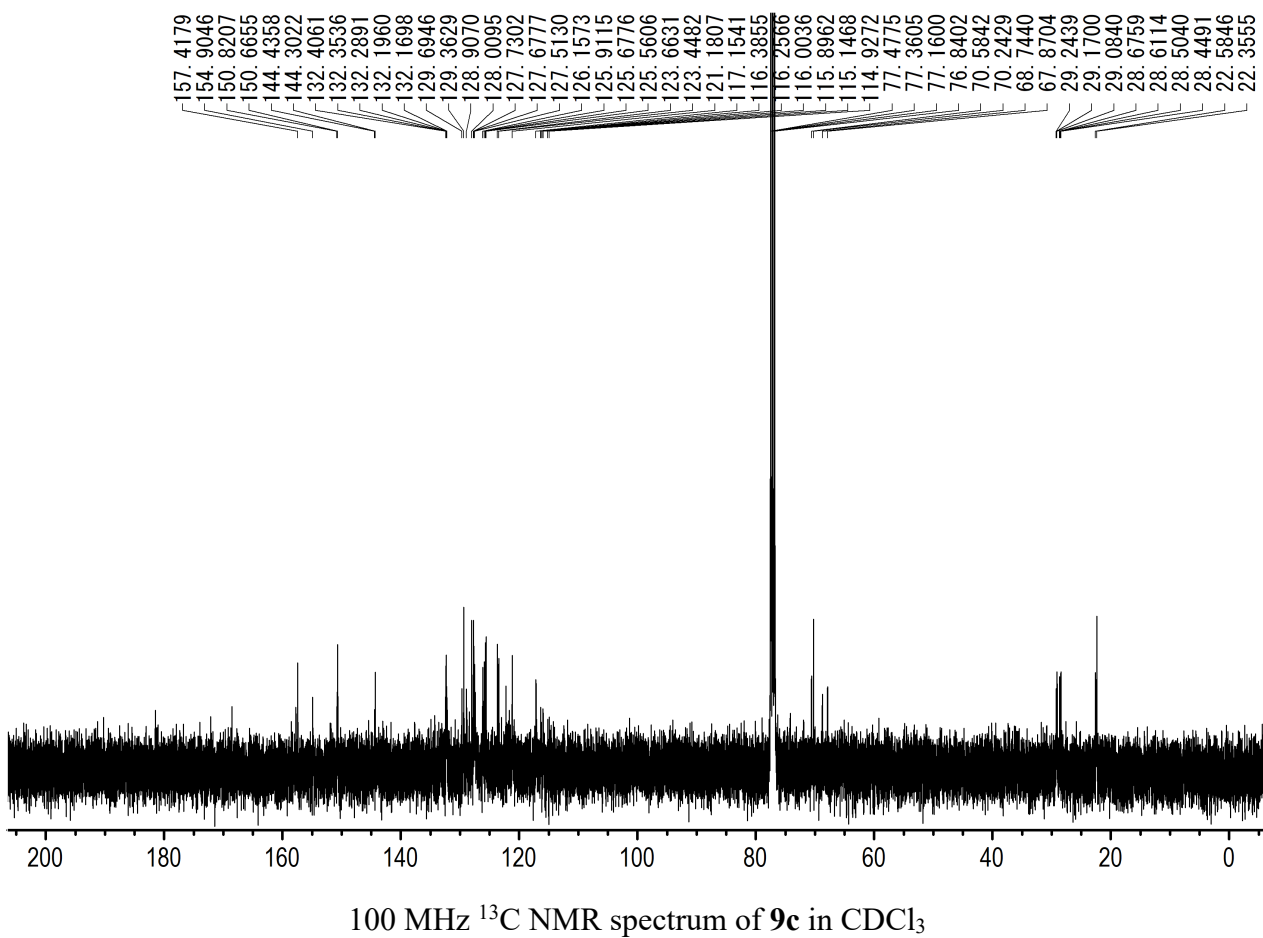

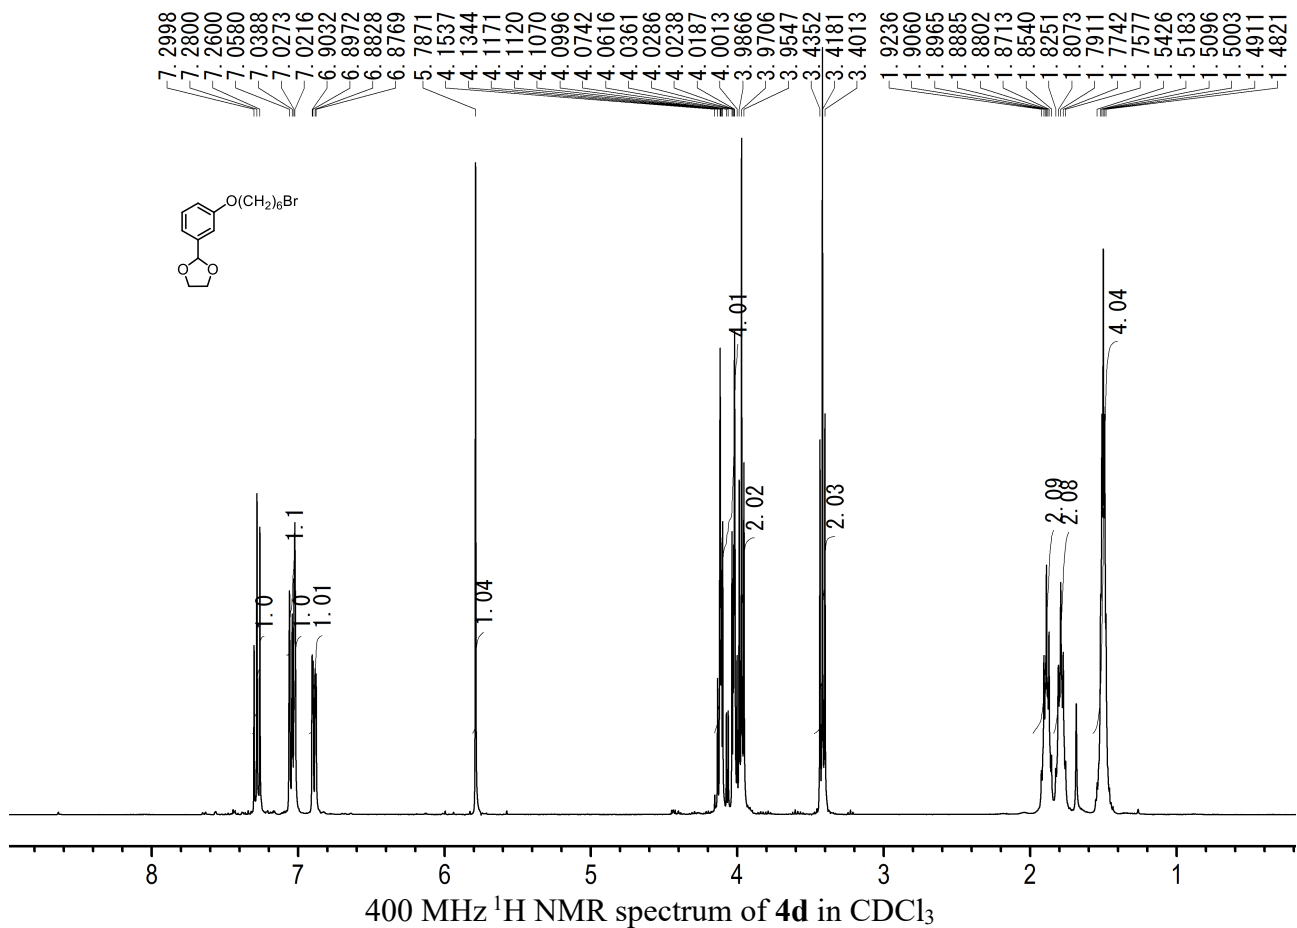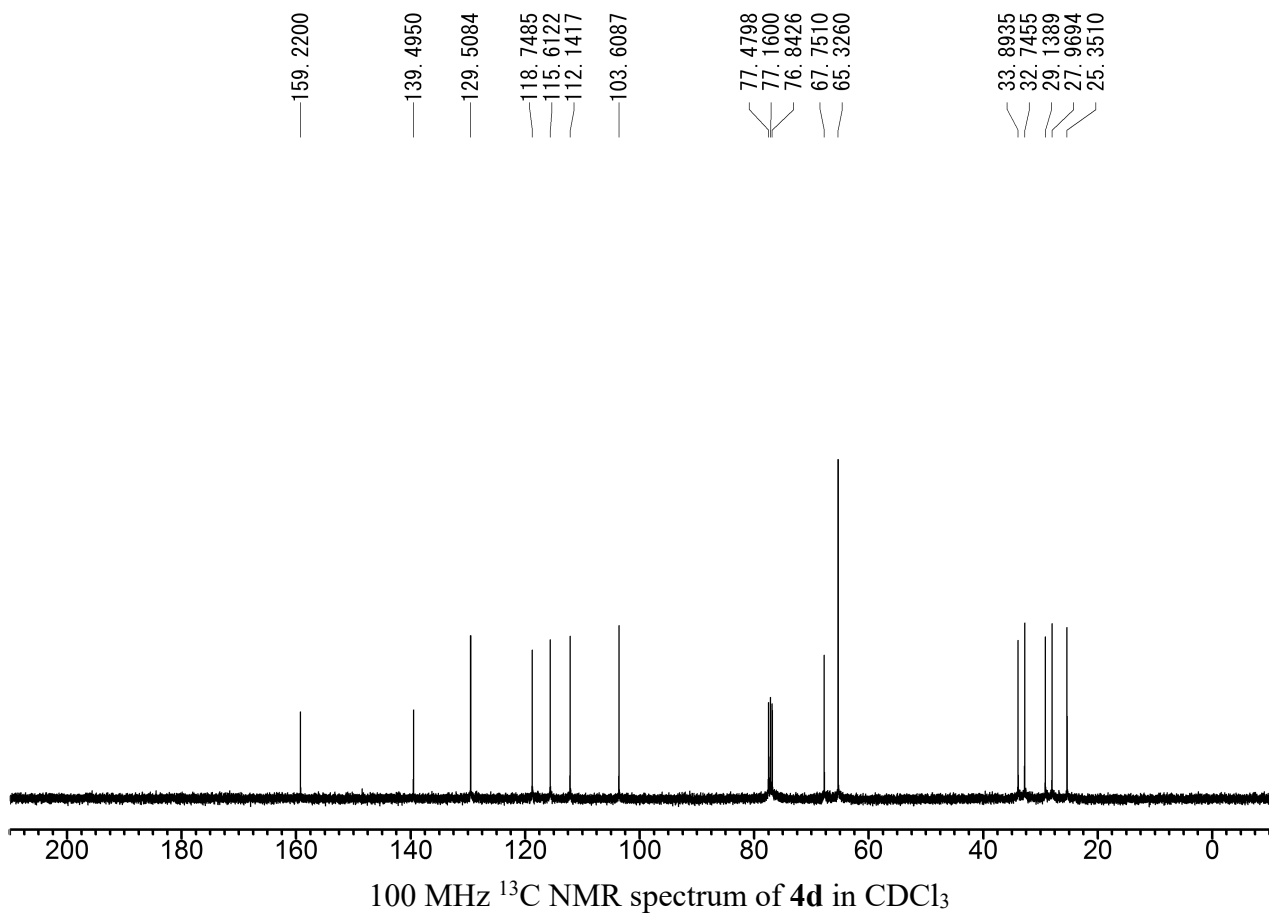

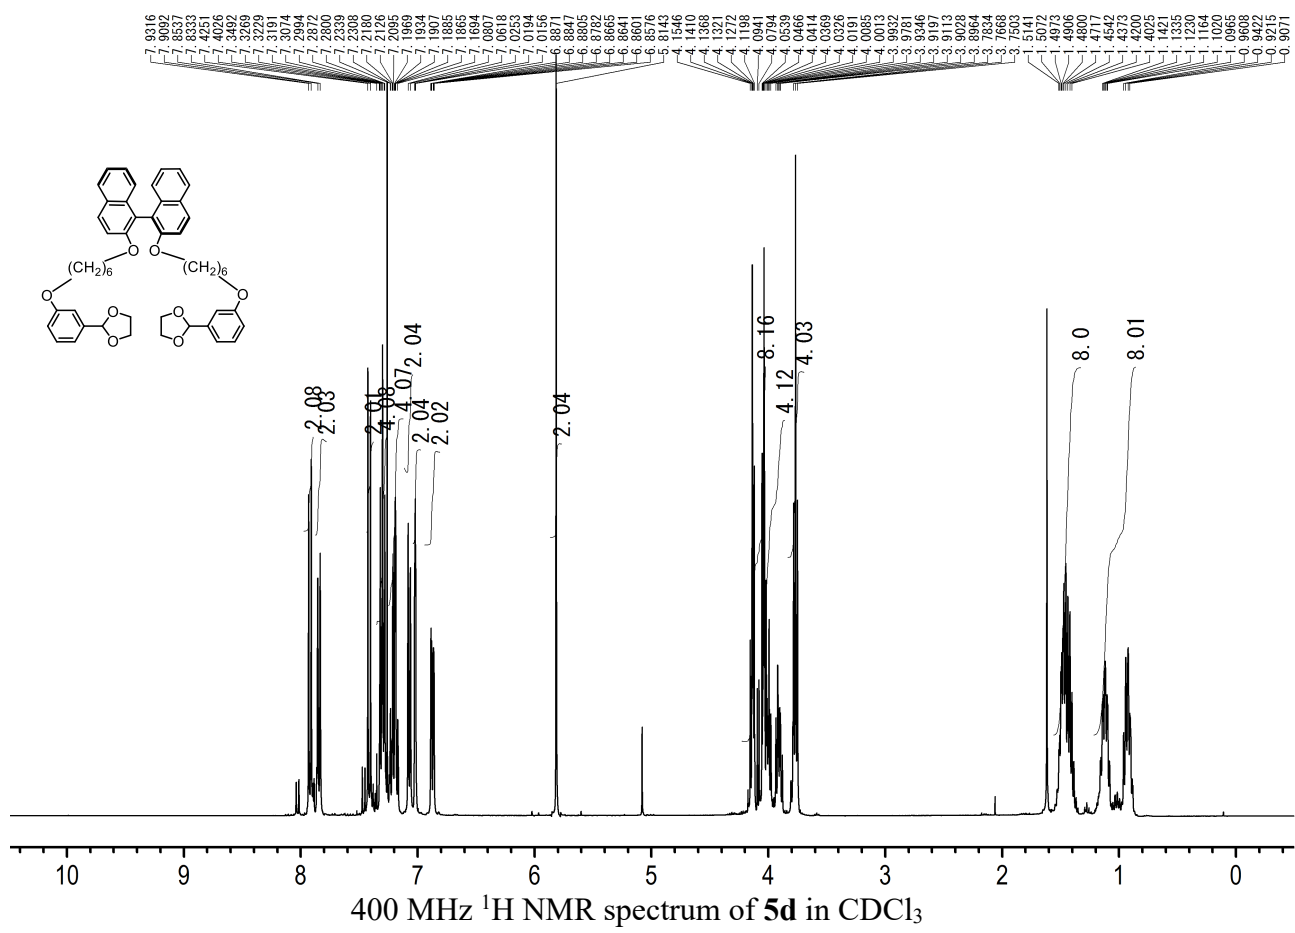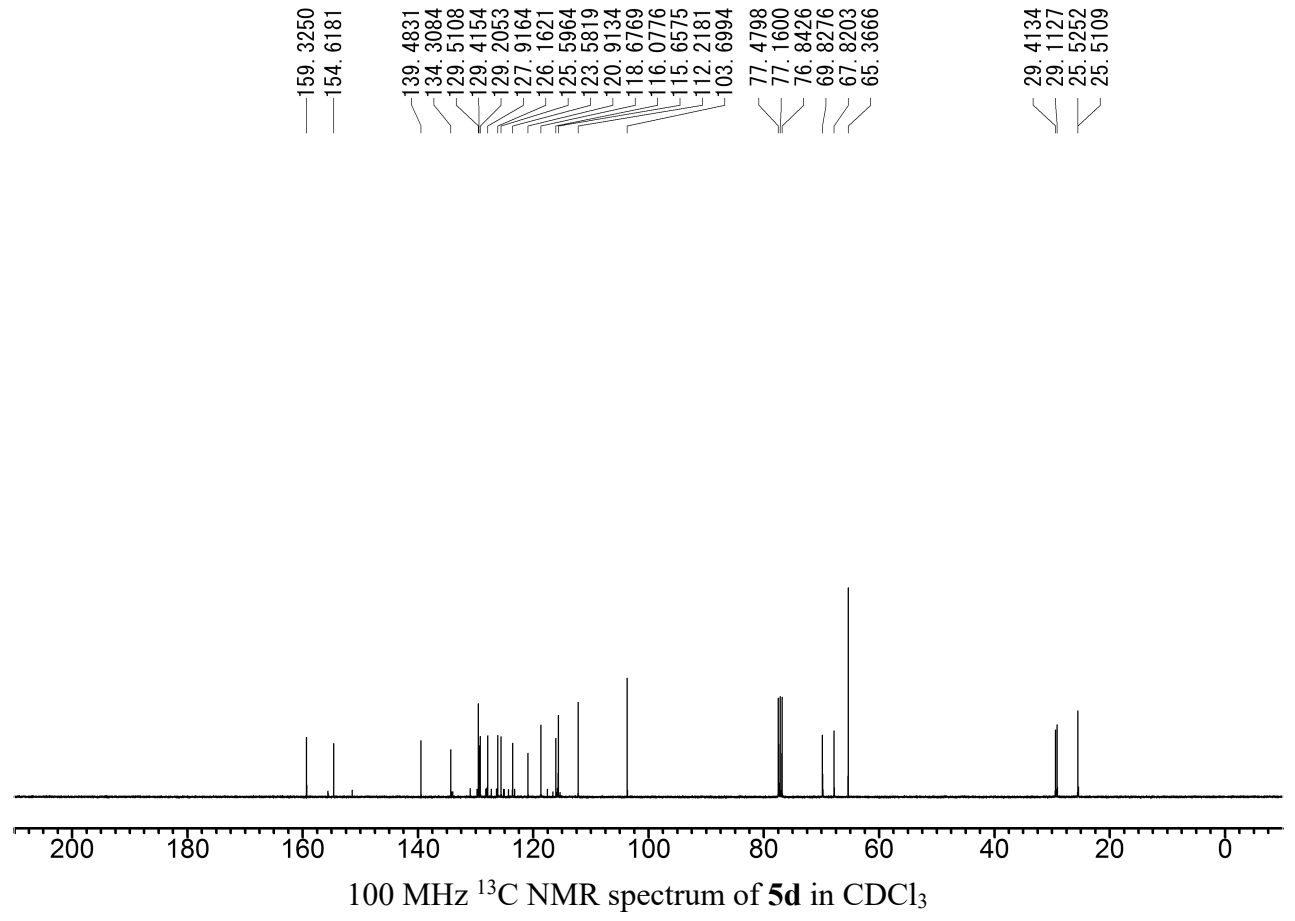

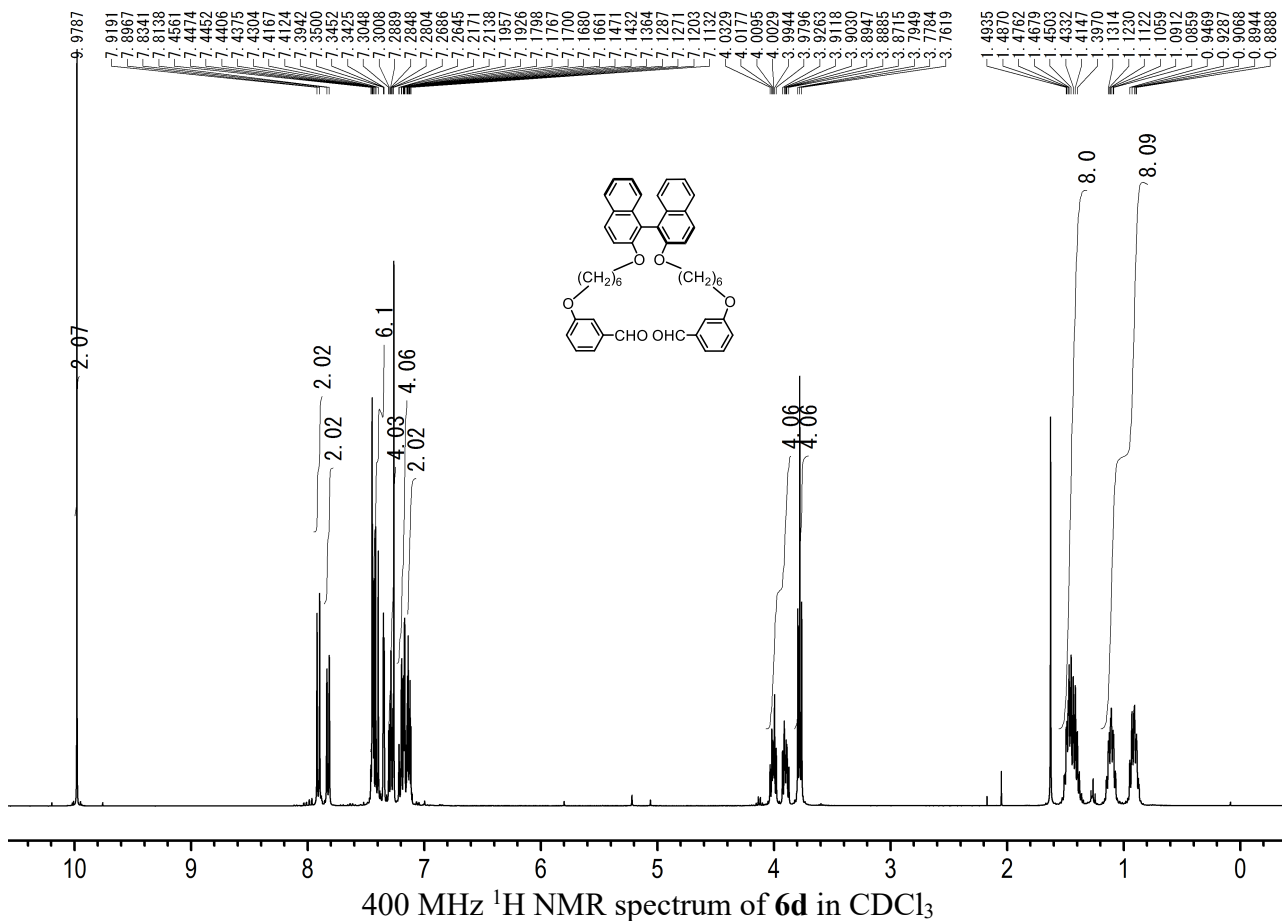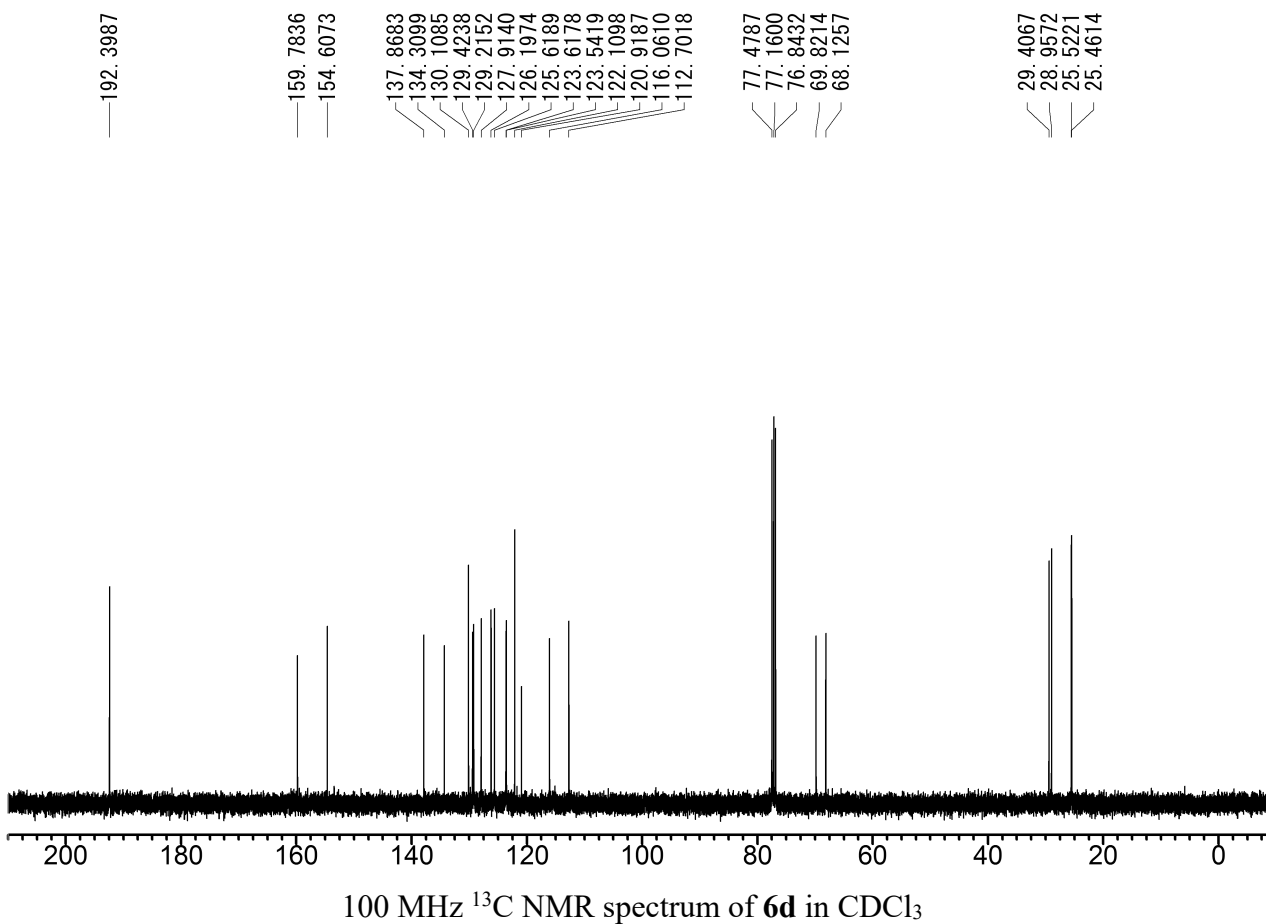

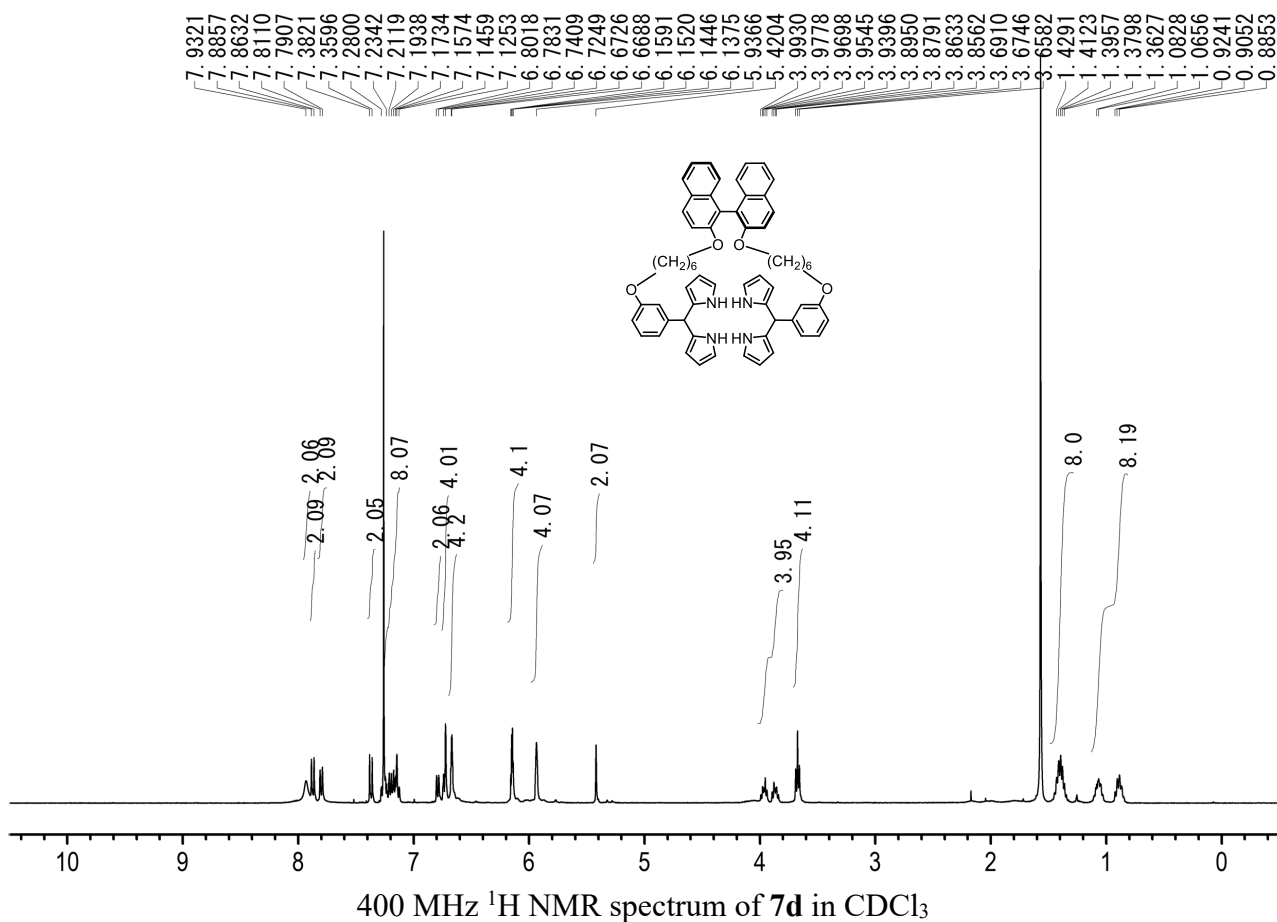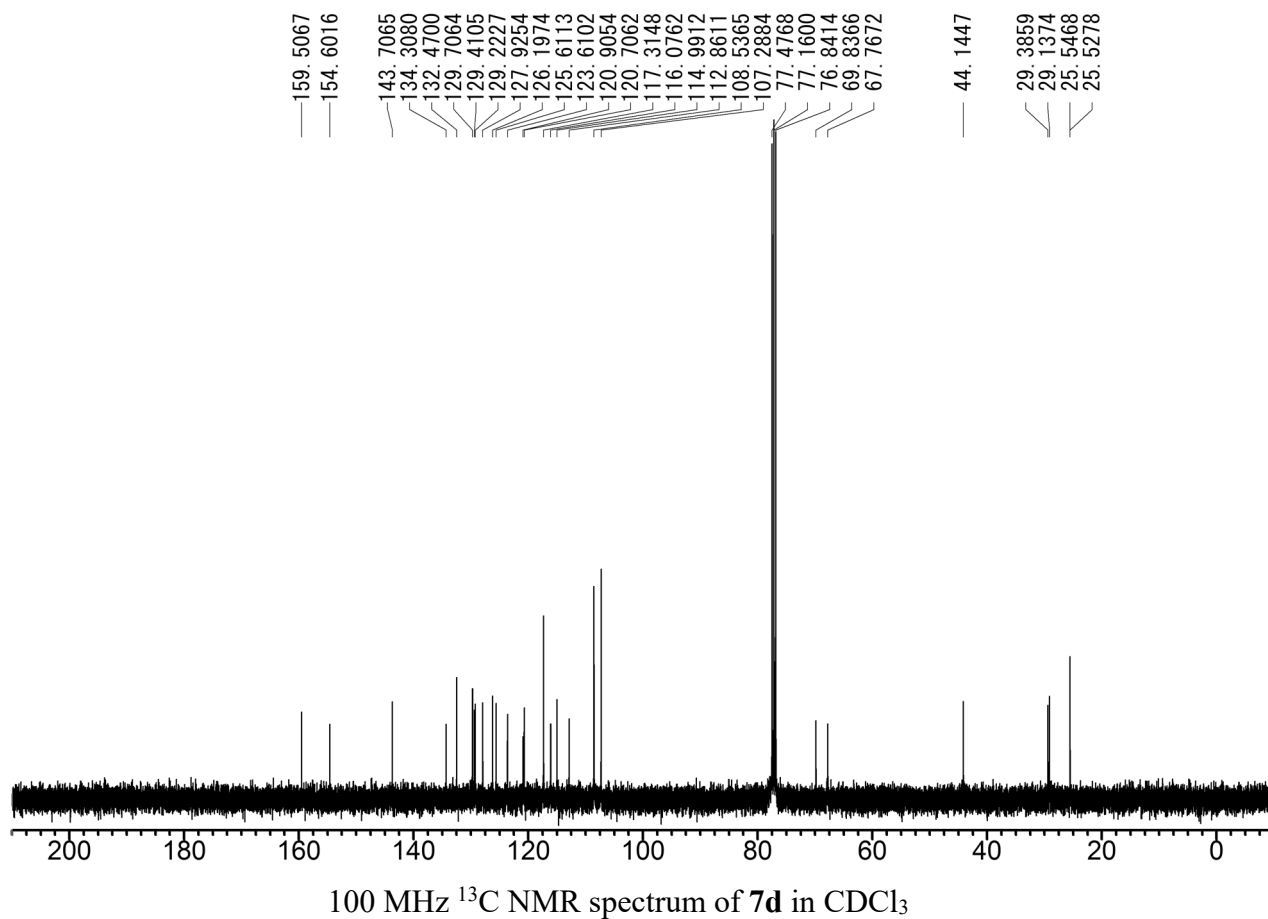

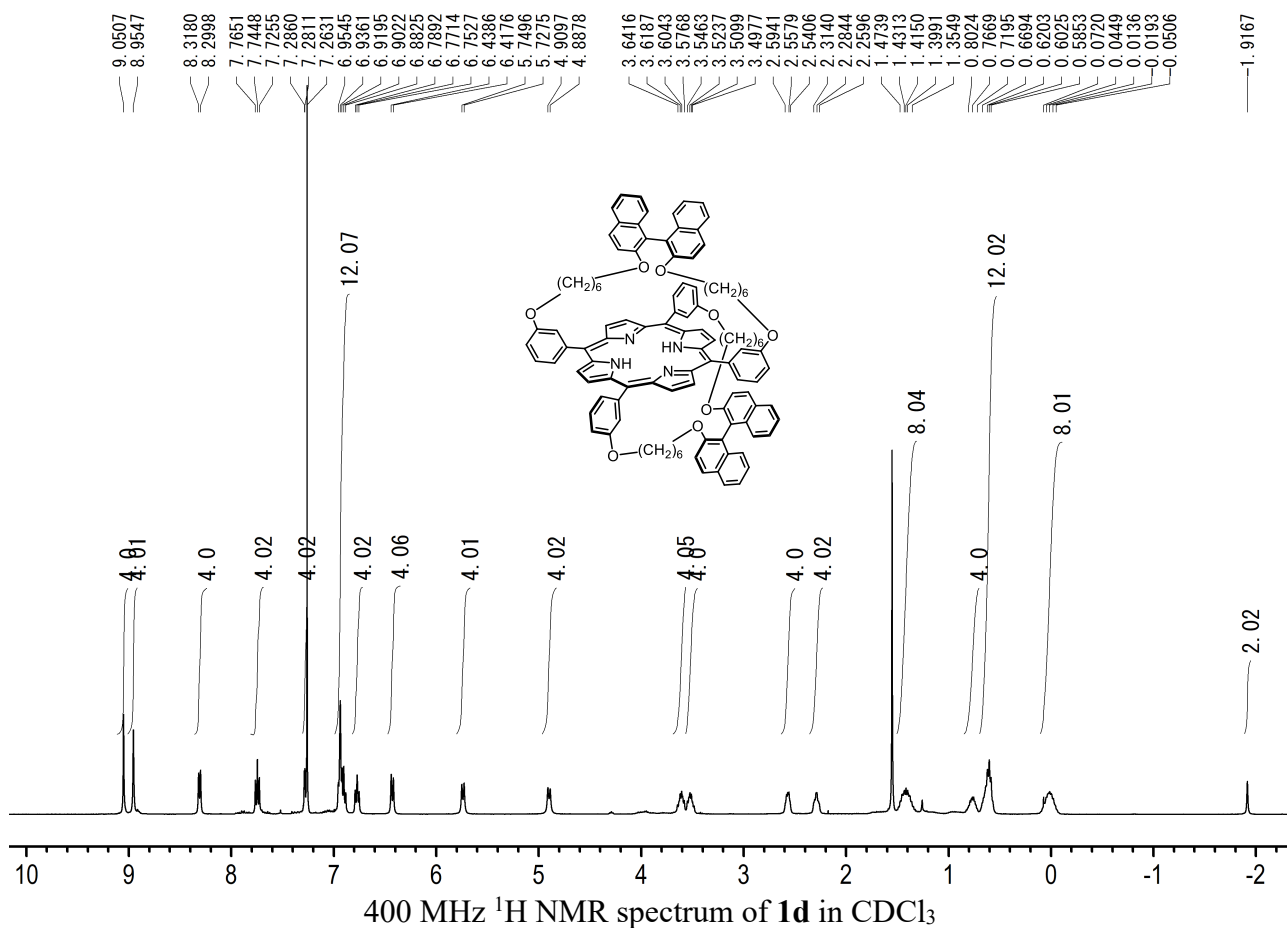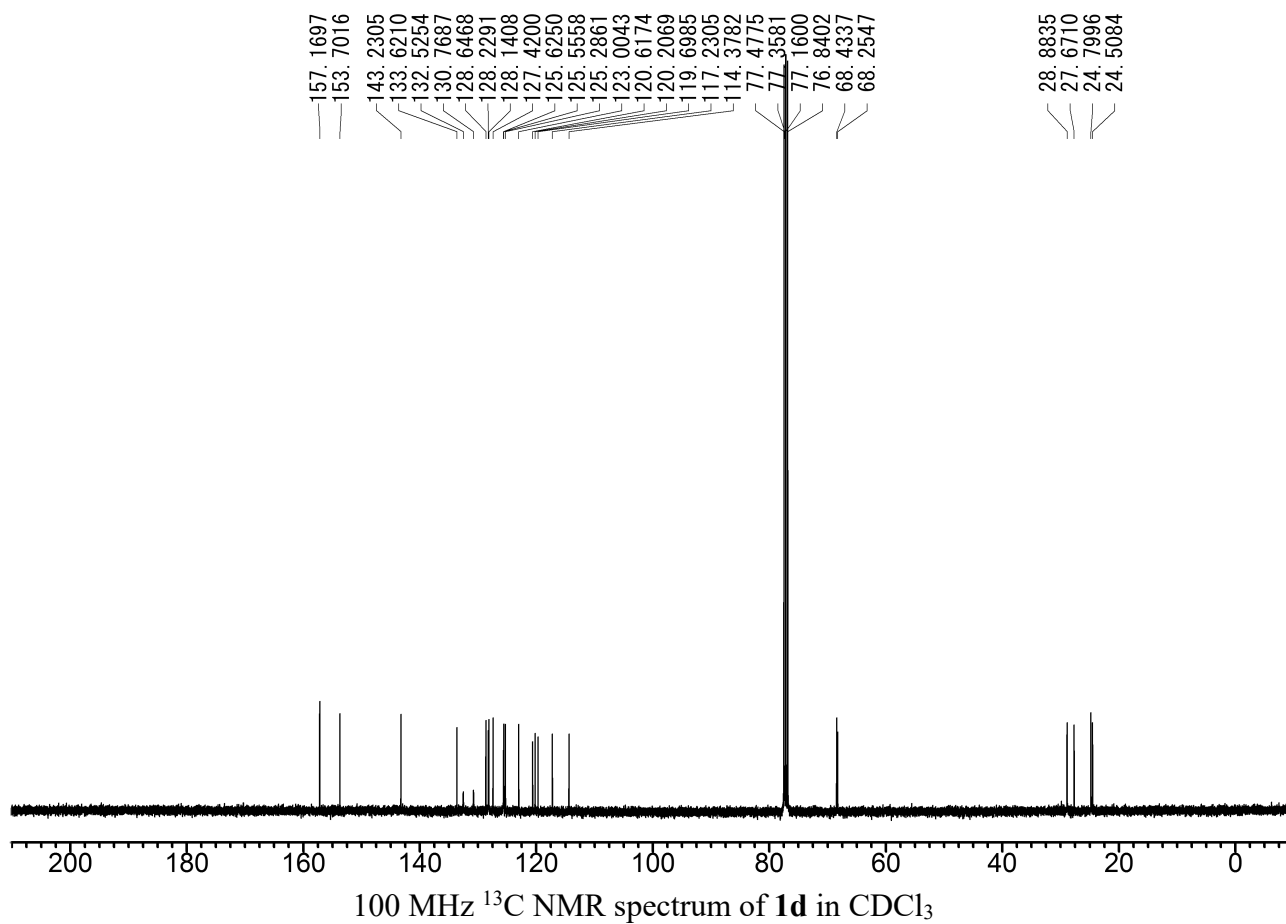

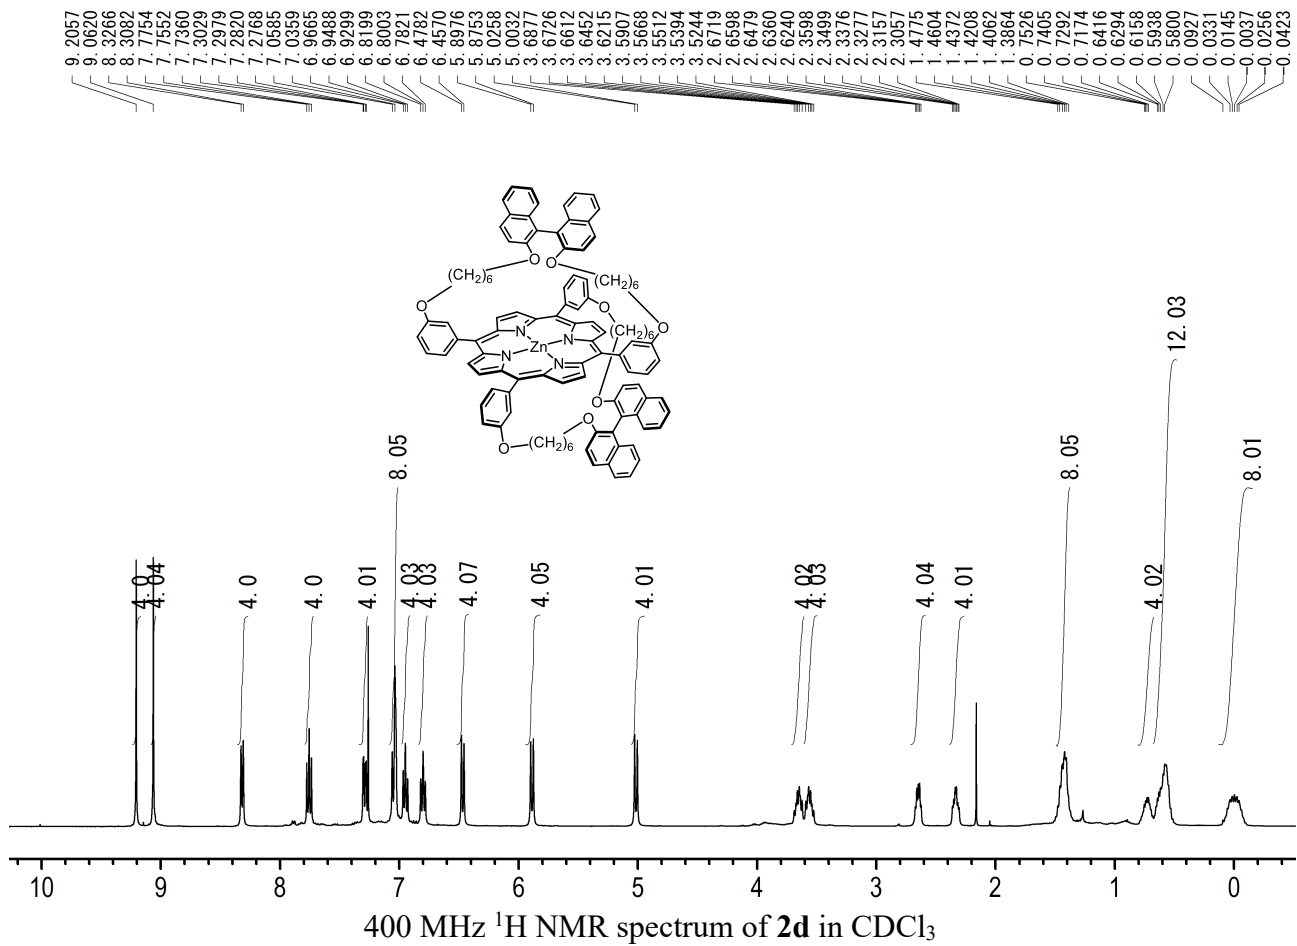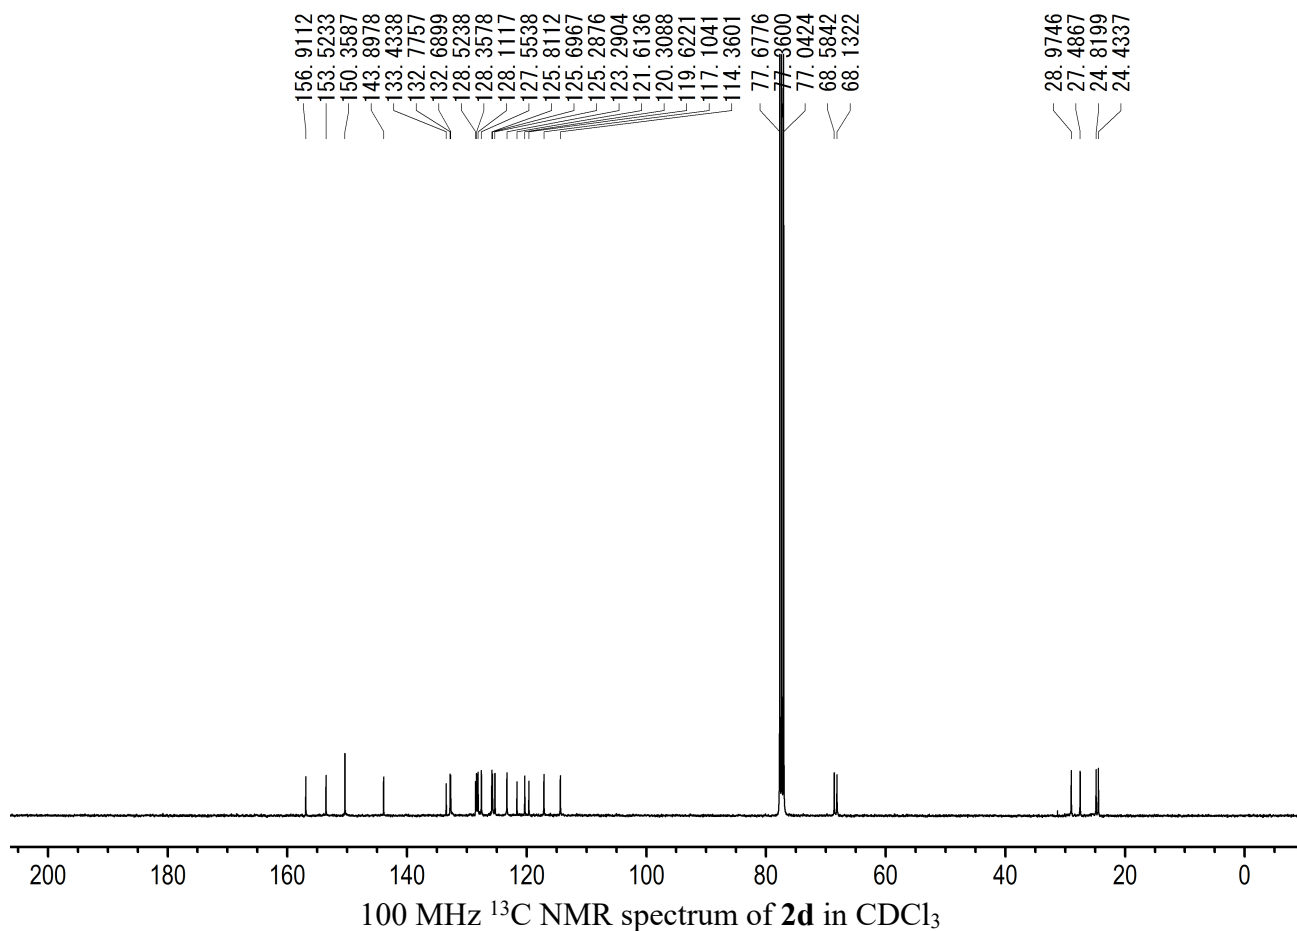



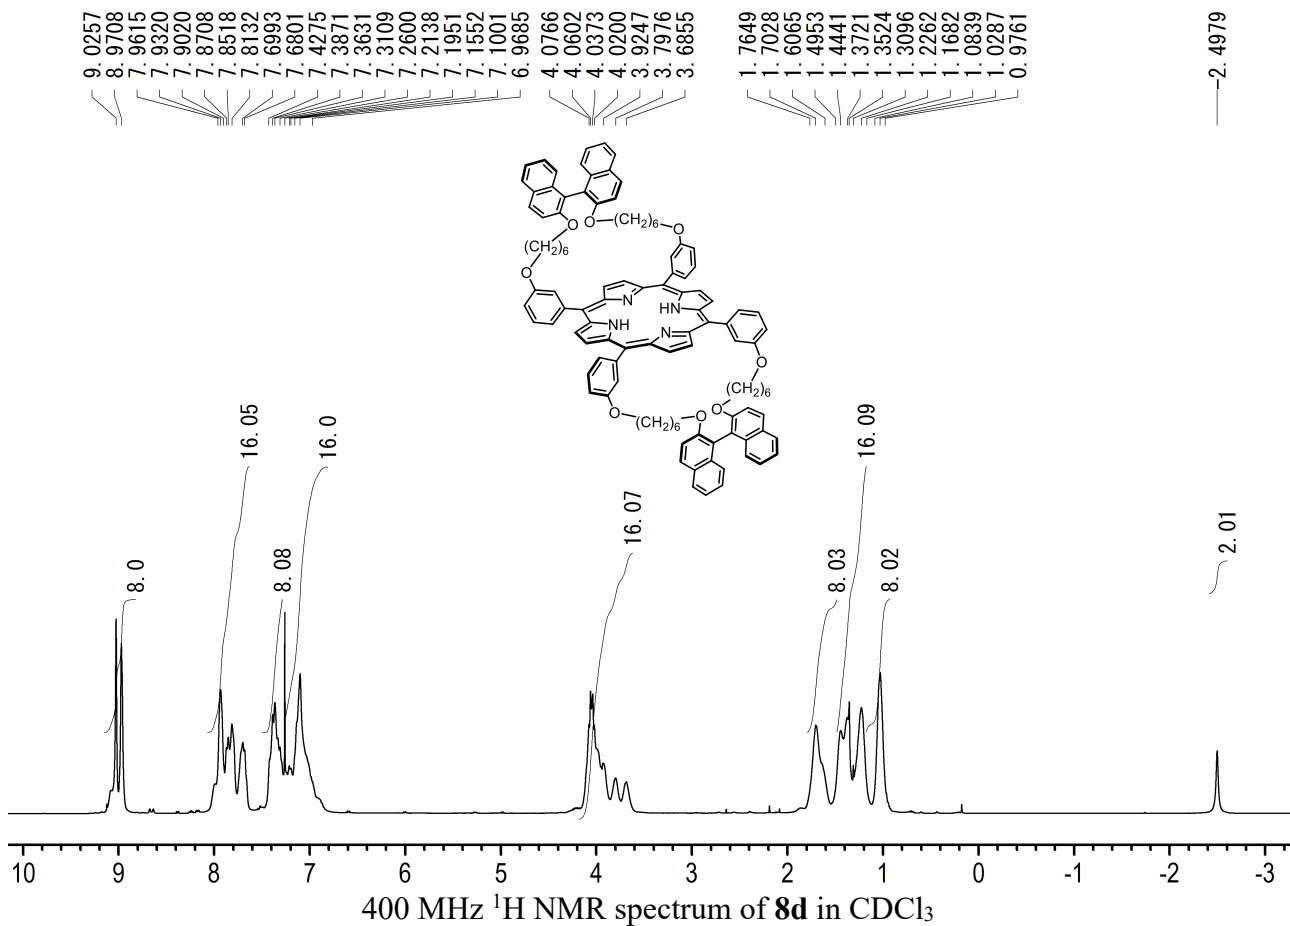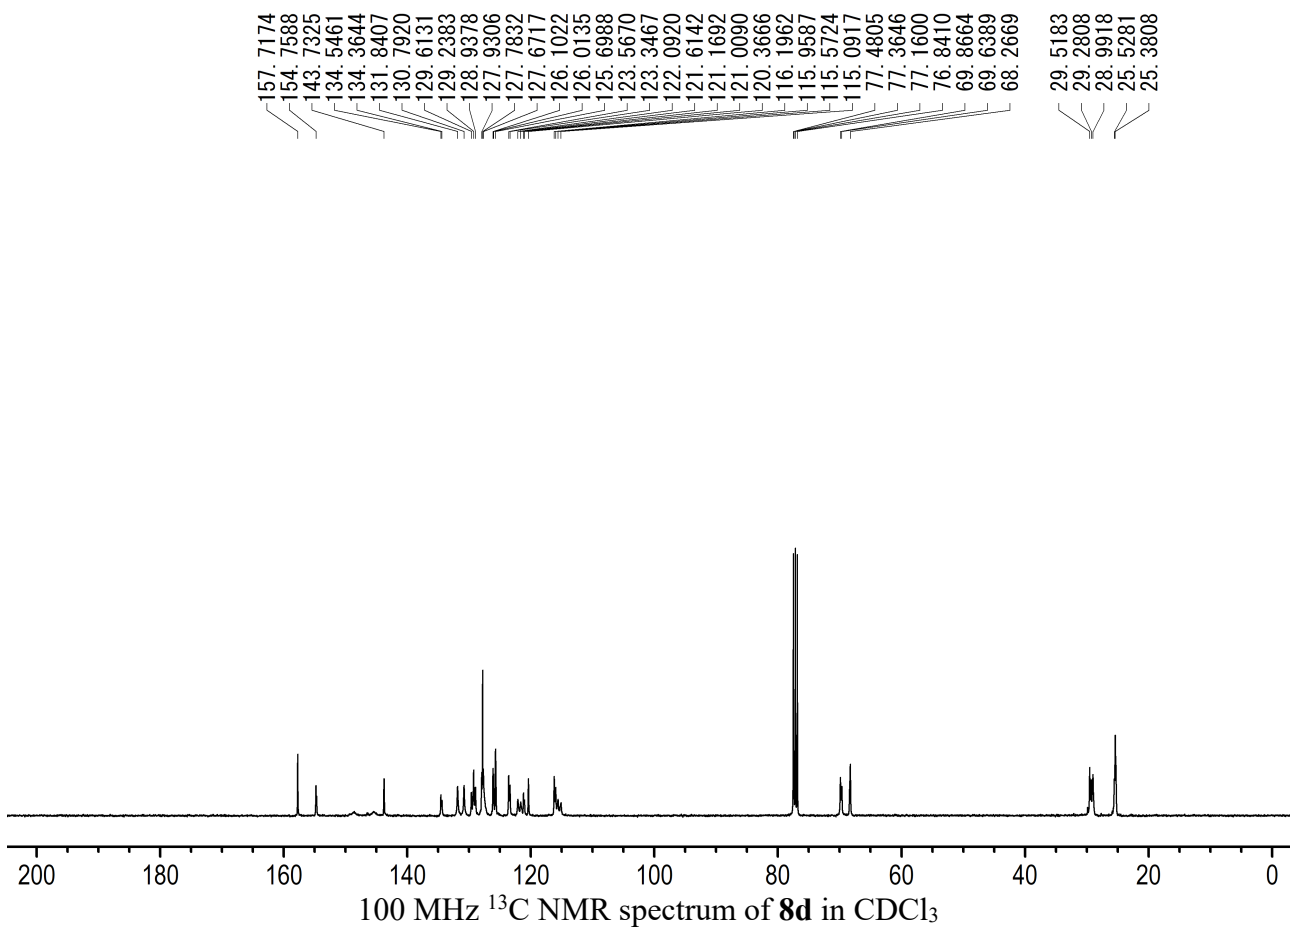

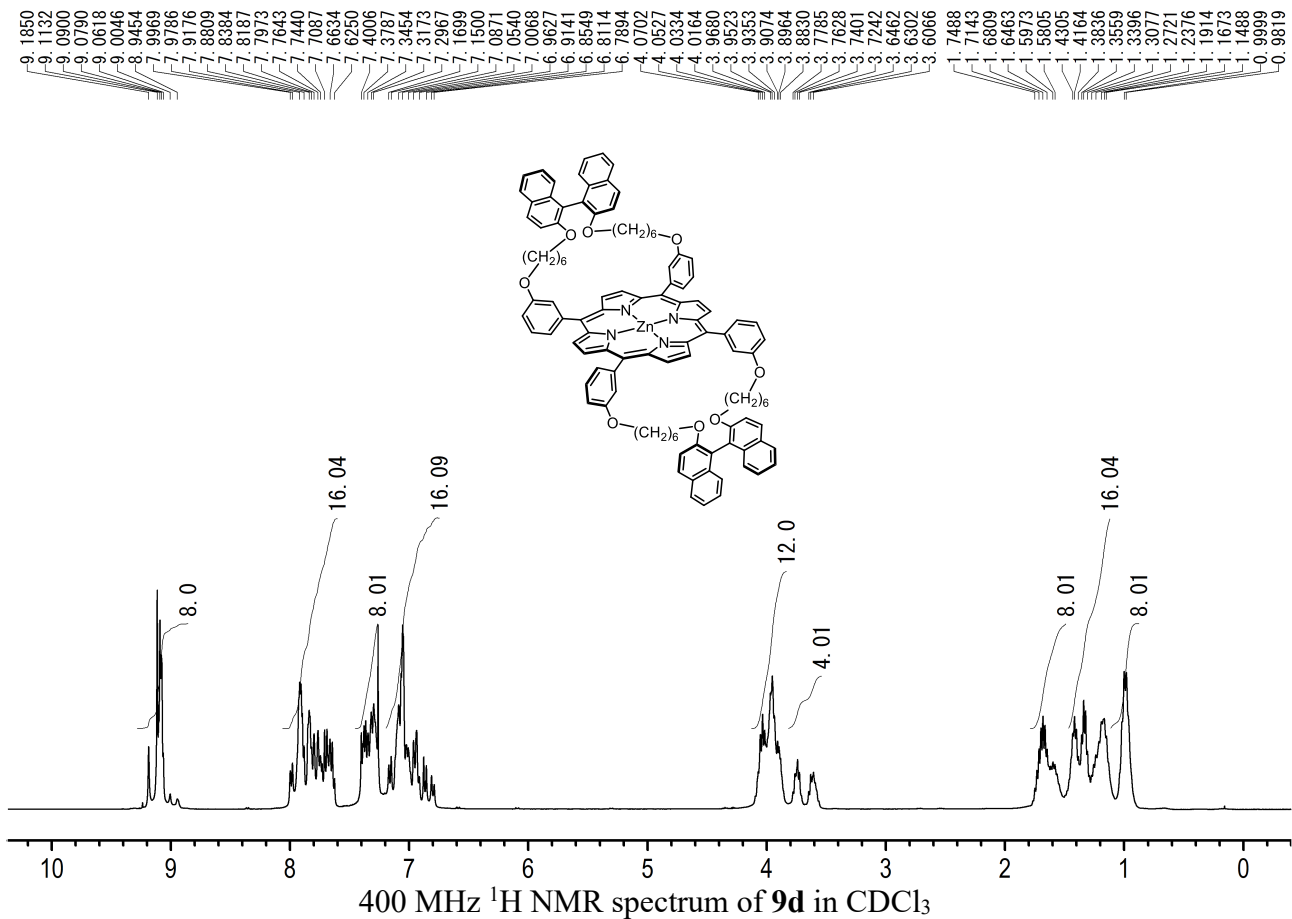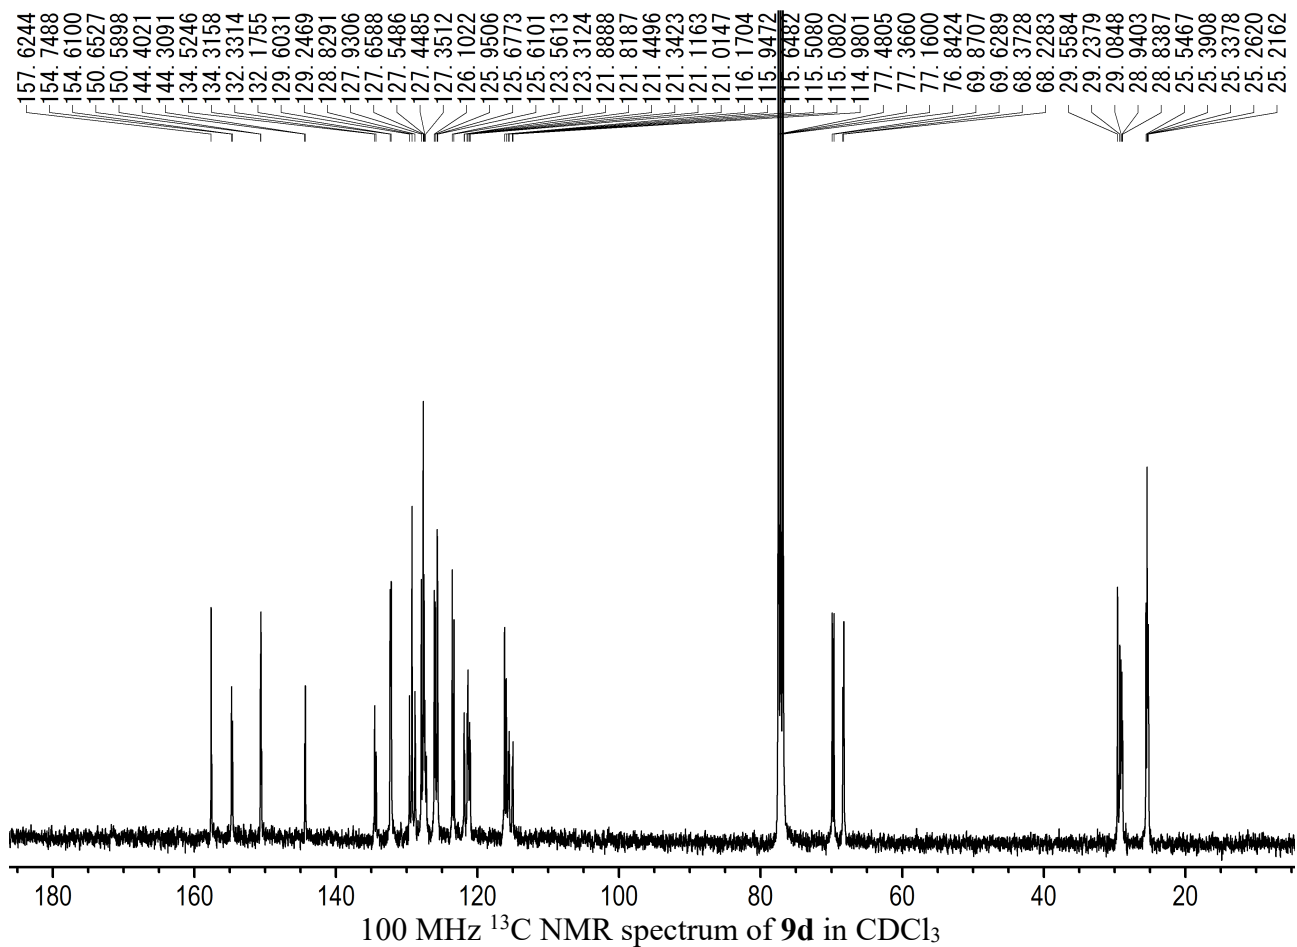

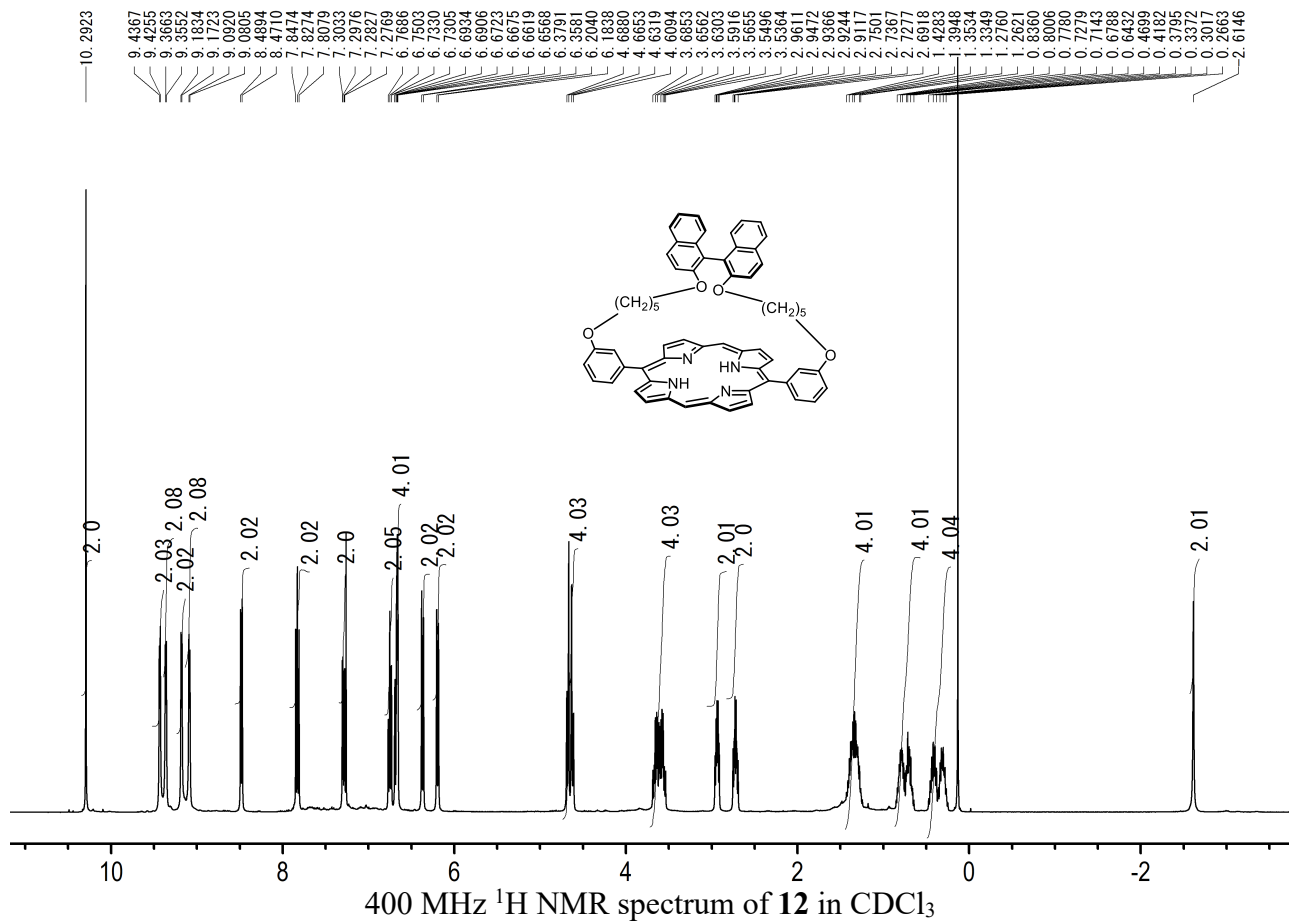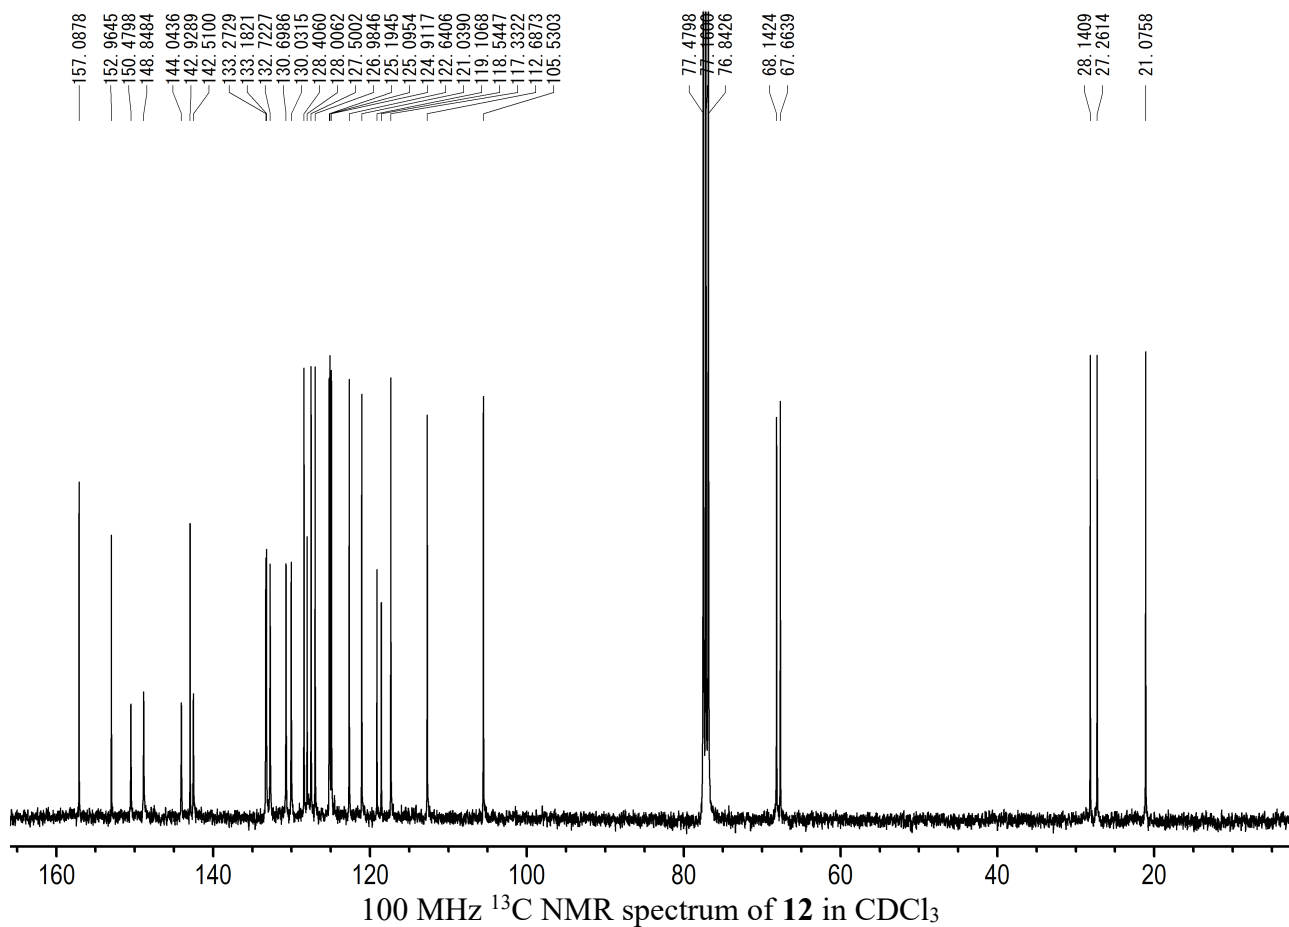

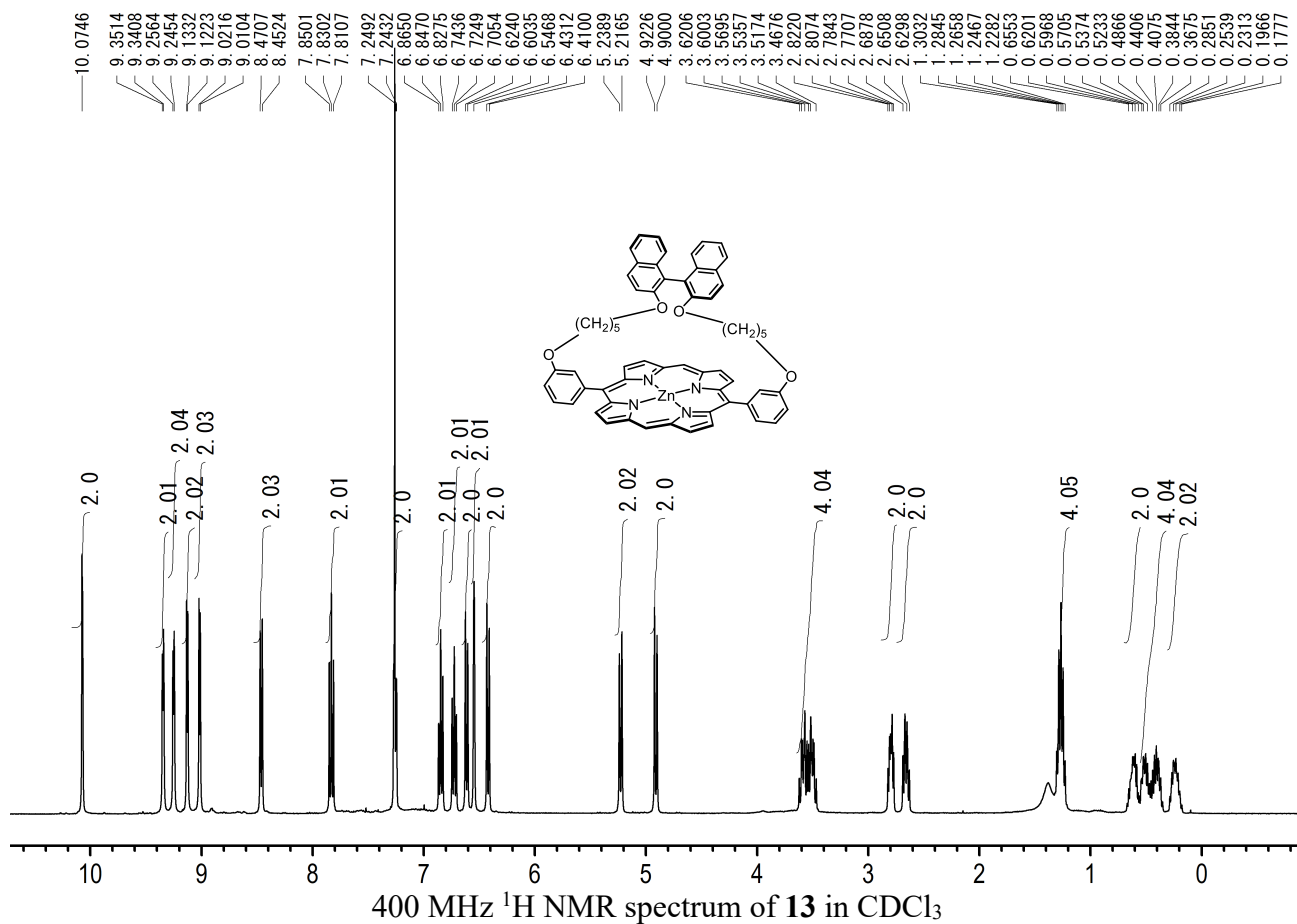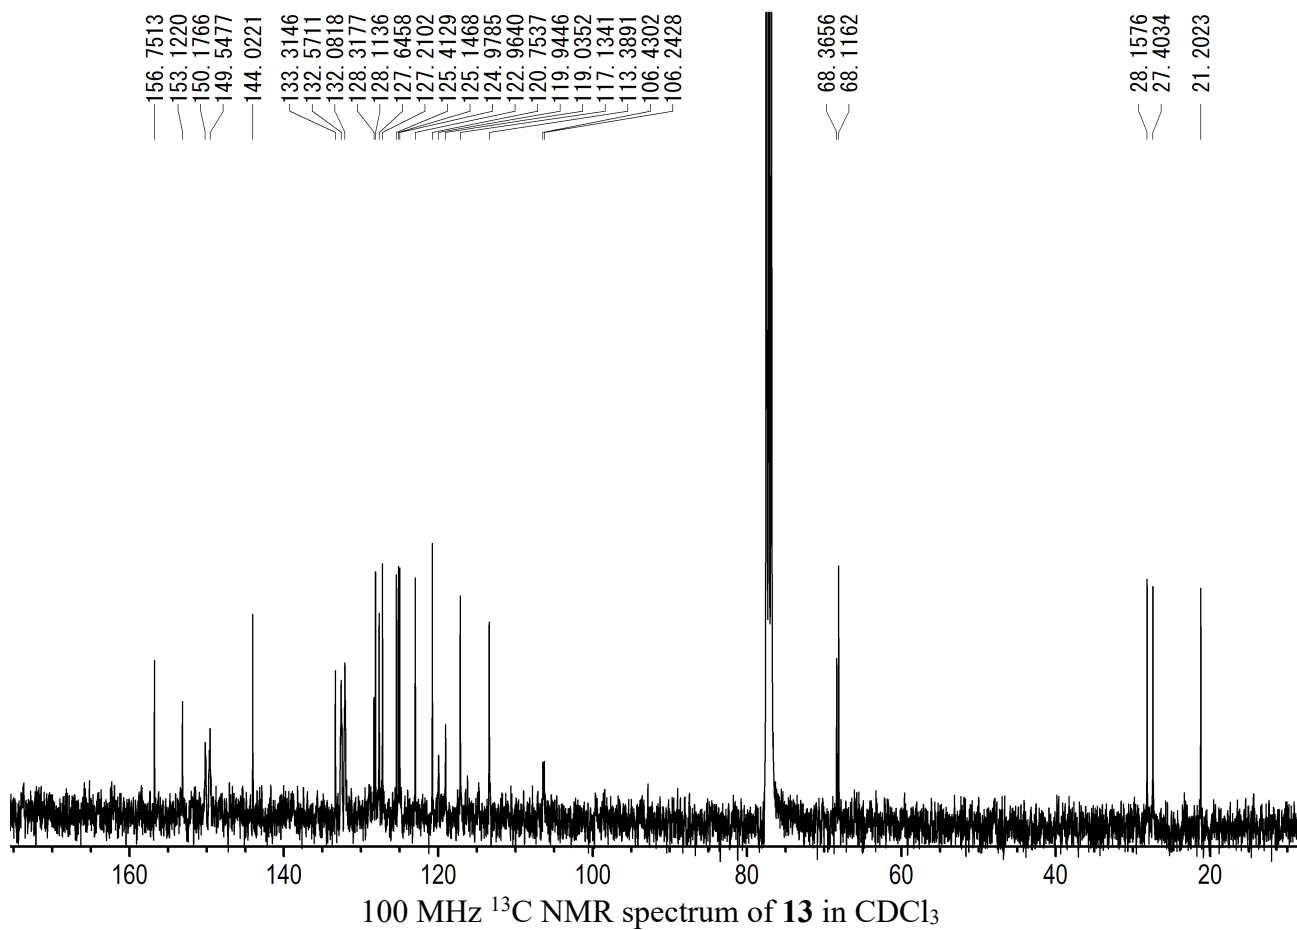

## [F] Photophysical Properties

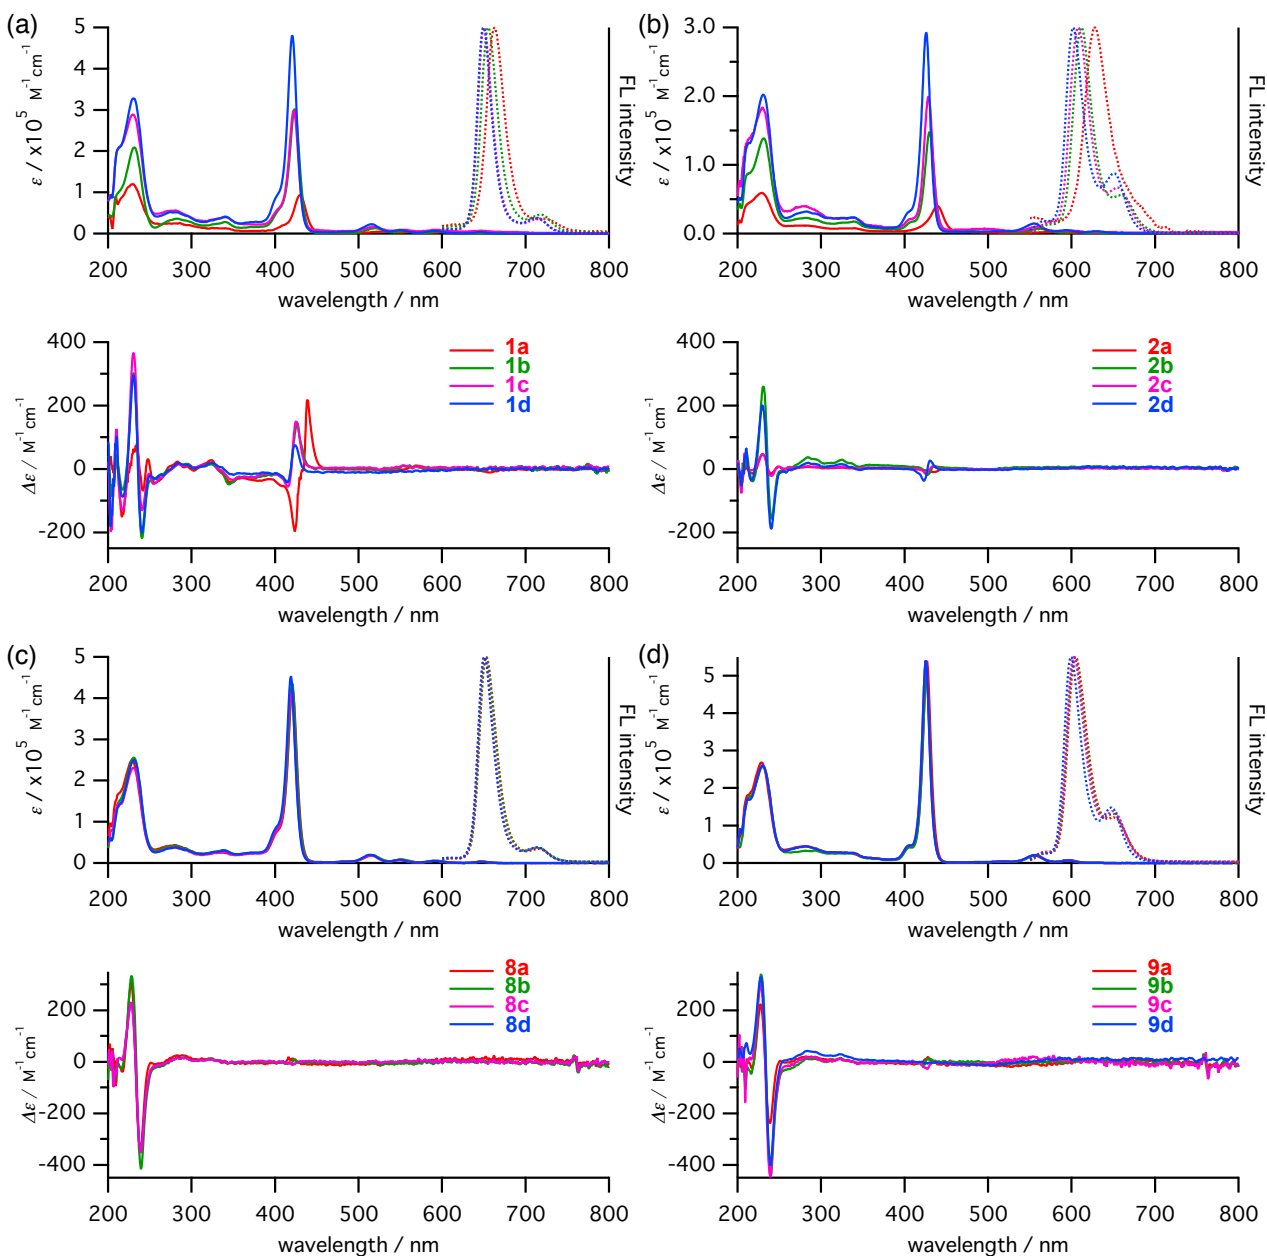

**Fig. S1** UV, FL, CD spectra of (a) **1a-d**, (b) **2a-d**, (c) **8a-d**, and (d) **9a-d** in 1,4-dioxane.

## [G] DFT calculations

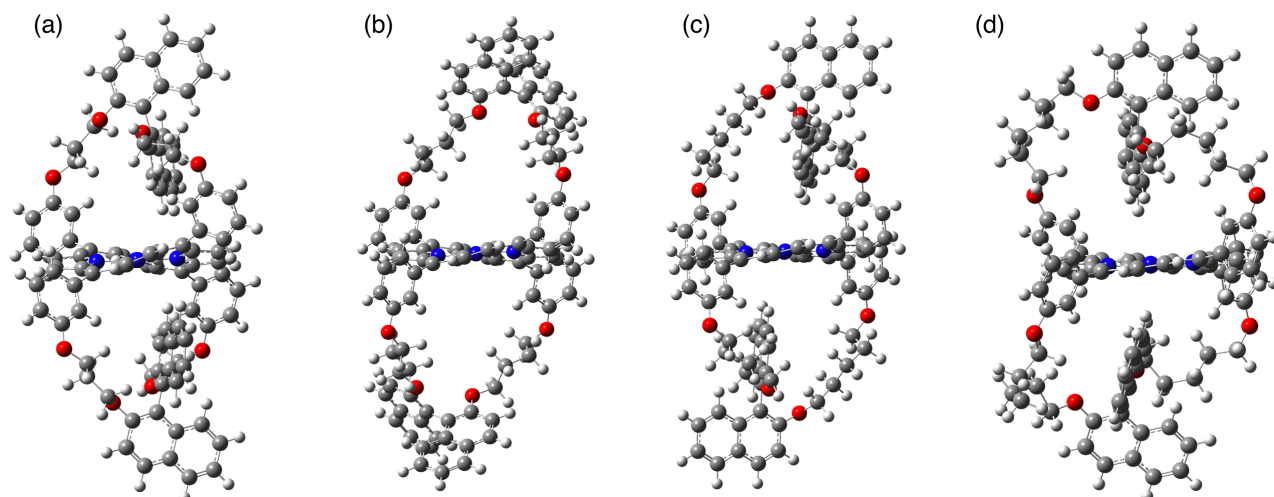

**Fig. S2** Optimized structures of (a) **1a**, (b) **1b**, (c) **1c**, and (d) **1d** calculated at the B3LYP/6-31G\* level.

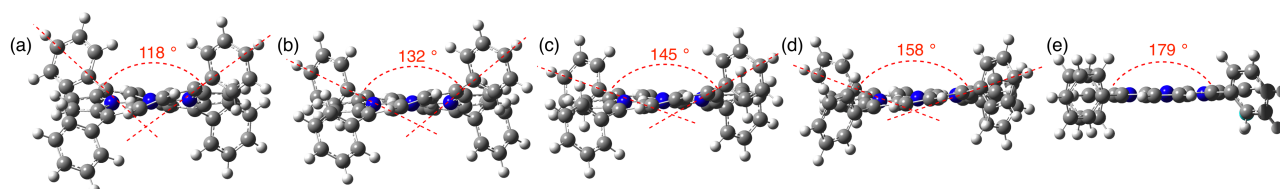

**Fig. S3** Structures of TPP based on (a) **1a**, (b) **1b**, (c) **1c**, (d) **1d**, and (e) optimized structure. Dihedral angles between the trans-phenyl rings are shown.

**Table S2** MPD and strain energy in **1a–d**.<sup>a</sup>

|           | MPD (Å) | Total energy (a.u.) | Strain energy (a.u.) | Strain energy (kcal/mol) |
|-----------|---------|---------------------|----------------------|--------------------------|
| TPP       | 0.039   | -1913.75073235      | 0                    | 0                        |
| <b>1a</b> | 0.301   | -1913.73081422      | 0.01991813           | 12.5                     |
| <b>1b</b> | 0.241   | -1913.73786911      | 0.01286324           | 8.1                      |
| <b>1c</b> | 0.170   | -1913.74258572      | 0.00814663           | 5.1                      |
| <b>1d</b> | 0.119   | -1913.74487267      | 0.00585968           | 3.7                      |

<sup>a</sup> The total energy was calculated for the optimized structure of TPP and the TPP moieties of **1a–d**, and the strain energy was calculated by comparing the energy of the TPP moieties of **1a–d** with that of the optimized structure of TPP.

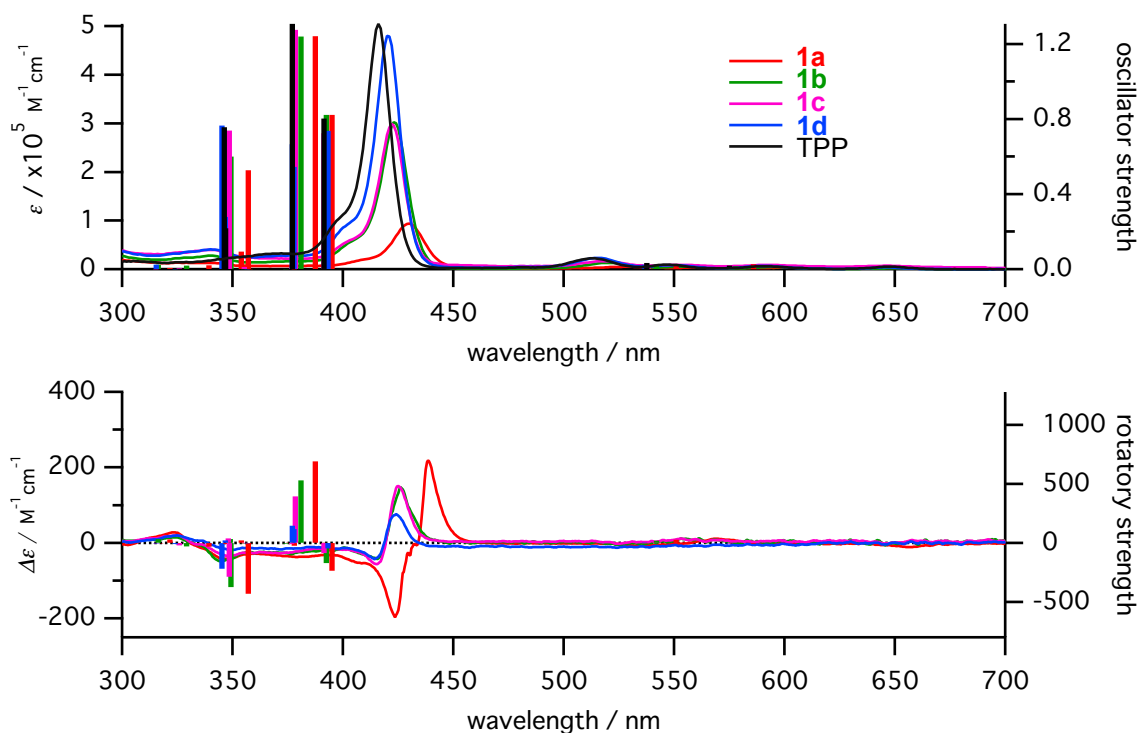

**Fig. S4** UV/vis absorption (top) and CD (bottom) spectra of **1a–d** in 1,4-dioxane. Calculated oscillator strengths and rotatory strengths of TPP based on **1a–d** and the optimized structure are inserted.

**Table S3** Oscillator strengths ( $f$ ) and rotatory strengths ( $R$ ) of TPP based on **1a–d** and the optimized structure calculated at the B3LYP/6-31G(d) level.

| <b>1a</b>      |        |          | <b>1b</b>      |        |          | <b>1c</b>      |        |          | <b>1d</b>      |        |          | <b>TPP</b>     |        |         |
|----------------|--------|----------|----------------|--------|----------|----------------|--------|----------|----------------|--------|----------|----------------|--------|---------|
| $\lambda$ (nm) | $f$    | $R$      | $\lambda$ (nm) | $f$    | $R$     |
| 586            | 0.0267 | -5.5295  | 578            | 0.016  | -3.2815  | 575            | 0.0192 | 0.9238   | 575            | 0.0127 | -2.2218  | 575            | 0.0188 | -1.7424 |
| 551            | 0.0277 | 28.8398  | 542            | 0.024  | 18.5276  | 538            | 0.0209 | 15.6371  | 537            | 0.0257 | 6.4939   | 538            | 0.0344 | -3.4737 |
| 395            | 0.8225 | -235.793 | 392            | 0.823  | -170.406 | 391            | 0.7252 | -84.7388 | 393            | 0.7384 | -46.6777 | 391            | 0.8026 | 6.4071  |
| 387            | 1.2422 | 692.325  | 381            | 1.2414 | 531.094  | 378            | 1.2769 | 394.461  | 378            | 0.5463 | 119.614  | 377            | 1.3082 | 1.4768  |
| 378            | 0.0024 | -23.1235 | 374            | 0.0003 | -6.5145  | 377            | 0.0096 | -9.4321  | 377            | 0.6668 | 147.908  | 375            | 0.0001 | 1.8253  |
| 358            | 0.0022 | -2.1332  | 355            | 0      | 0.0416   | 355            | 0.0116 | 2.7777   | 356            | 0.0005 | 0.1162   | 355            | 0.0004 | 0.0605  |
| 357            | 0.5281 | -430.449 | 349            | 0.6007 | -373.973 | 348            | 0.7395 | -285.037 | 347            | 0.2783 | 21.1971  | 347            | 0.2183 | -9.9921 |
| 354            | 0.0941 | 22.3395  | 349            | 0.1543 | 34.2321  | 348            | 0.1714 | 39.8536  | 345            | 0.7652 | -217.452 | 346            | 0.758  | -5.8096 |

The oscillator strengths slightly decrease and the rotatory strengths increase with increasing distortion.

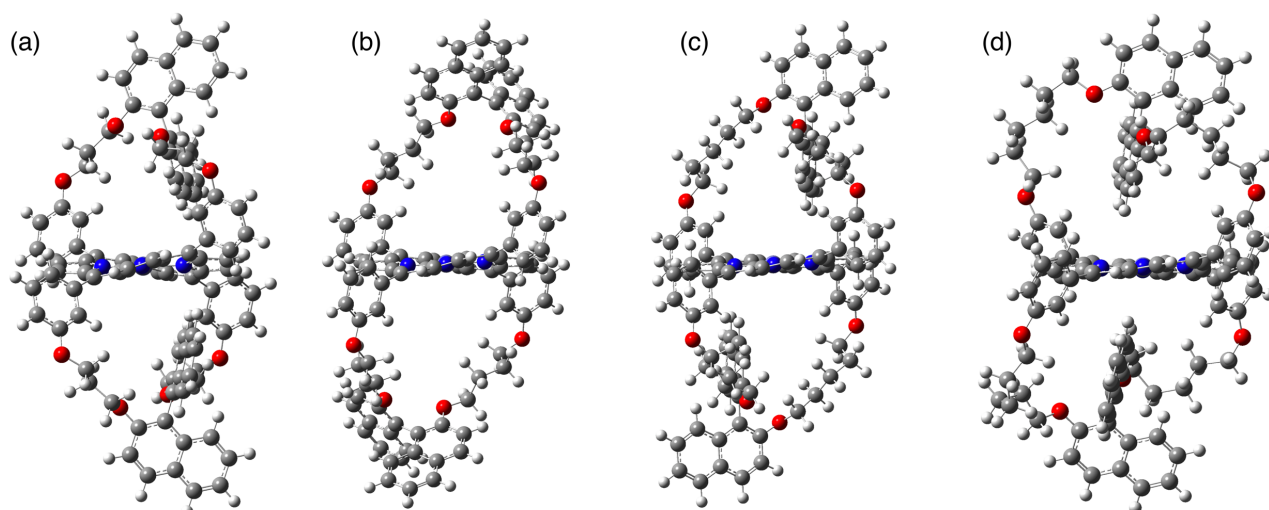

**Fig. S5** Optimized structures of (a) **2a**, (b) **2b**, (c) **2c**, and (d) **2d** calculated at the B3LYP/6-31G\* level.

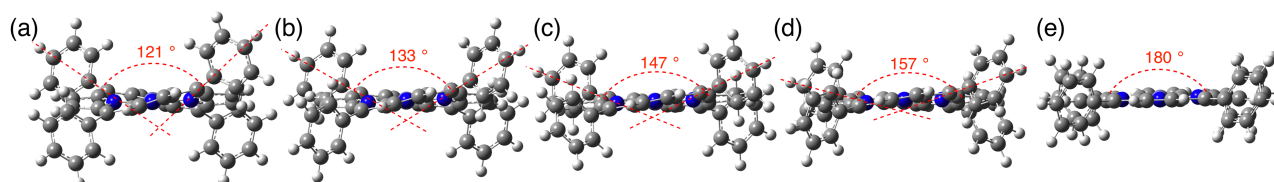

**Fig. S6** Structures of ZnTPP based on (a) **2a**, (b) **2b**, (c) **2c**, (d) **2d**, and (e) optimized structure. Dihedral angles between the trans-phenyl rings are shown.

**Table S4** MPD and strain energy in **2a–d**.<sup>a</sup>

|           | MPD (Å) | Total energy (a.u.) | Strain energy (a.u.) <sup>[a]</sup> | Strain energy (kcal/mol) |
|-----------|---------|---------------------|-------------------------------------|--------------------------|
| ZnTPP     | 0.032   | -3691.78565550      | 0                                   | 0                        |
| <b>2a</b> | 0.243   | -3691.76595291      | 0.01970259                          | 12.4                     |
| <b>2b</b> | 0.206   | -3691.77272566      | 0.01292984                          | 8.1                      |
| <b>2c</b> | 0.141   | -3691.77788263      | 0.00777287                          | 4.9                      |
| <b>2d</b> | 0.128   | -3691.77975724      | 0.00589826                          | 3.7                      |

<sup>a</sup> The total energy was calculated for the optimized structure of ZnTPP and the ZnTPP moieties of **2a–d**, and the strain energy was calculated by comparing the energy of the ZnTPP moieties of **2a–d** with that of the optimized structure of ZnTPP



**Optimized structure of 1a**

|   |          |          |          |
|---|----------|----------|----------|
| H | 3.54313  | -1.7486  | -0.61416 |
| C | 4.24479  | -0.9315  | -0.73151 |
| H | 2.69234  | 0.49004  | -1.07845 |
| C | 3.7634   | 0.3283   | -1.00188 |
| C | 6.53594  | -0.08907 | -0.68039 |
| C | 4.64145  | 1.42473  | -1.18177 |
| C | 5.63861  | -1.14961 | -0.5847  |
| C | 6.05113  | 1.20822  | -1.03049 |
| C | 4.16202  | 2.72315  | -1.50499 |
| H | 7.99462  | 2.1615   | -1.16817 |
| C | 5.03236  | 3.77128  | -1.6968  |
| H | 3.08931  | 2.87137  | -1.59779 |
| H | 4.65486  | 4.75918  | -1.94602 |
| C | 6.42735  | 3.55767  | -1.57609 |
| H | 7.11422  | 4.38265  | -1.74793 |
| C | 6.92316  | 2.31513  | -1.24843 |
| C | 8.4223   | -0.04744 | 0.93861  |
| C | 7.97886  | -0.30497 | -0.35064 |
| C | 10.68878 | -0.6894  | 0.38169  |
| C | 8.91785  | -0.77803 | -1.32346 |
| C | 9.77772  | -0.23896 | 1.3052   |
| C | 10.29033 | -0.96879 | -0.9523  |
| C | 8.53718  | -1.06314 | -2.66382 |
| H | 10.068   | -0.0429  | 2.33342  |
| H | 12.25124 | -1.57799 | -1.63079 |
| H | 11.72752 | -0.84357 | 0.66449  |
| C | 9.4583   | -1.5123  | -3.58383 |
| H | 7.50167  | -0.91641 | -2.95429 |
| H | 9.14517  | -1.72245 | -4.60321 |
| C | 10.81124 | -1.7031  | -3.21394 |
| H | 11.5281  | -2.05921 | -3.94892 |
| C | 11.21384 | -1.43583 | -1.92545 |
| O | 6.18804  | -2.37634 | -0.32016 |
| C | 7.52723  | 1.75484  | 2.20615  |
| C | 6.46252  | 2.03018  | 3.26745  |
| H | 6.81758  | 1.7239   | 4.2577   |
| H | 5.58047  | 1.42459  | 3.03572  |
| C | 6.11249  | 3.52289  | 3.29358  |

|   |          |          |          |
|---|----------|----------|----------|
| H | 5.55096  | 3.81097  | 2.39547  |
| H | 7.0306   | 4.12053  | 3.31444  |
| O | 5.40851  | 3.93114  | 4.46983  |
| C | 4.04865  | 3.83005  | 4.54056  |
| C | 1.27042  | 3.70475  | 4.91755  |
| C | 3.24607  | 3.13279  | 3.63171  |
| C | 3.4545   | 4.47498  | 5.63653  |
| C | 2.07718  | 4.41425  | 5.81287  |
| C | 1.85536  | 3.0518   | 3.82656  |
| H | 3.6816   | 2.61106  | 2.78782  |
| H | 4.09259  | 5.01546  | 6.32856  |
| H | 1.62407  | 4.9261   | 6.65786  |
| H | 0.19517  | 3.6613   | 5.0609   |
| N | -0.43809 | -1.88287 | 0.47832  |
| N | 0.40446  | 1.92284  | 0.50711  |
| C | 0.22663  | 2.80929  | -0.51655 |
| C | 0.89803  | 2.65697  | 1.5499   |
| C | 0.54754  | 0.98756  | 3.35964  |
| C | -0.54407 | -0.99627 | 3.34681  |
| C | -0.91986 | -2.63372 | 1.51348  |
| C | -0.27315 | -2.75024 | -0.56242 |
| C | 0.08552  | -1.0836  | -2.37717 |
| C | -0.13943 | 1.17385  | -2.35877 |
| C | -0.13428 | 0.73638  | -3.72364 |
| C | -0.13641 | 2.48622  | -1.84517 |
| C | 0.60437  | 4.15686  | -0.10564 |
| C | 1.07166  | 2.202    | 2.87566  |
| C | 0.06482  | -0.62336 | -3.73471 |
| C | 0.08288  | -2.40507 | -1.88788 |
| C | -0.65019 | -4.10517 | -0.17207 |
| C | 0.36767  | 0.5694   | 4.72041  |
| C | -1.0751  | -2.20211 | 2.84976  |
| C | -1.09844 | -4.02239 | 1.10548  |
| C | 1.06854  | 4.05208  | 1.16456  |
| C | -0.34222 | -0.60516 | 4.71293  |
| H | 0.7116   | 1.11861  | 5.58349  |
| H | 1.45392  | 4.8359   | 1.8022   |
| H | -0.60826 | -4.97752 | -0.80994 |
| H | 0.55358  | 5.04017  | -0.72772 |
| H | -0.67224 | -1.17398 | 5.5688   |

|   |          |          |          |
|---|----------|----------|----------|
| H | 0.15227  | -1.26202 | -4.60067 |
| H | -1.47755 | -4.81713 | 1.73323  |
| H | -0.23208 | 1.38717  | -4.57928 |
| C | 0.57223  | -3.49881 | -2.78328 |
| C | 1.77371  | -5.45876 | -4.39658 |
| C | -0.04511 | -3.90069 | -3.97229 |
| C | 1.77903  | -4.10636 | -2.39518 |
| C | 2.3918   | -5.07114 | -3.19793 |
| C | 0.56308  | -4.88114 | -4.76567 |
| H | -0.99253 | -3.46231 | -4.27004 |
| H | 2.23307  | -3.78092 | -1.4685  |
| H | 0.08244  | -5.19943 | -5.68697 |
| H | 2.254    | -6.21242 | -5.0126  |
| O | 3.57645  | -5.68531 | -2.89903 |
| C | 4.23419  | -5.36272 | -1.66936 |
| H | 3.50495  | -5.37146 | -0.84764 |
| H | 4.92235  | -6.19577 | -1.50049 |
| C | 5.00119  | -4.03299 | -1.72115 |
| H | 4.38812  | -3.2734  | -2.21526 |
| H | 5.9087   | -4.15038 | -2.32315 |
| C | 5.38338  | -3.55291 | -0.3144  |
| O | 7.52649  | 0.35203  | 1.91366  |
| H | 7.30944  | 2.31723  | 1.28863  |
| H | 8.52077  | 2.06838  | 2.56089  |
| H | 4.49063  | -3.40881 | 0.31006  |
| H | 6.00984  | -4.2981  | 0.18613  |
| H | -3.5505  | 1.79126  | -0.53126 |
| C | -4.23294 | 0.96015  | -0.66201 |
| H | -2.64546 | -0.4277  | -0.98474 |
| C | -3.72076 | -0.28872 | -0.92625 |
| C | -6.50645 | 0.06985  | -0.6509  |
| C | -4.57233 | -1.40296 | -1.12275 |
| C | -5.6332  | 1.1485   | -0.5369  |
| C | -5.9888  | -1.21612 | -0.99626 |
| C | -4.05992 | -2.69069 | -1.43825 |
| H | -7.90902 | -2.20983 | -1.16986 |
| C | -4.90458 | -3.75636 | -1.64745 |
| H | -2.9826  | -2.81653 | -1.51001 |
| H | -4.5022  | -4.73588 | -1.89075 |
| C | -6.30572 | -3.57191 | -1.55216 |

|   |           |          |          |
|---|-----------|----------|----------|
| H | -6.97195  | -4.4108  | -1.73738 |
| C | -6.83334  | -2.34068 | -1.23145 |
| C | -8.4198   | -0.02149 | 0.93419  |
| C | -7.95875  | 0.25584  | -0.34467 |
| C | -10.68707 | 0.58673  | 0.34409  |
| C | -8.88898  | 0.72172  | -1.32939 |
| C | -9.78447  | 0.14297  | 1.27905  |
| C | -10.27066 | 0.88562  | -0.98019 |
| C | -8.49042  | 1.02622  | -2.66025 |
| H | -10.08908 | -0.06857 | 2.30003  |
| H | -12.22981 | 1.46818  | -1.6866  |
| H | -11.73308 | 0.72008  | 0.61019  |
| C | -9.40323  | 1.46873  | -3.5917  |
| H | -7.44784  | 0.8997   | -2.93443 |
| H | -9.07636  | 1.69407  | -4.6035  |
| C | -10.76534 | 1.63304  | -3.24342 |
| H | -11.47552 | 1.98415  | -3.98724 |
| C | -11.18526 | 1.34644  | -1.96466 |
| O | -6.21297  | 2.36218  | -0.2765  |
| C | -7.52027  | -1.82341 | 2.19742  |
| C | -6.46527  | -2.09751 | 3.26833  |
| H | -6.83485  | -1.80639 | 4.25786  |
| H | -5.58795  | -1.47911 | 3.05299  |
| C | -6.0977   | -3.58609 | 3.28061  |
| H | -5.53633  | -3.85997 | 2.37797  |
| H | -7.00861  | -4.19469 | 3.29959  |
| O | -5.38365  | -3.99657 | 4.4499   |
| C | -4.02469  | -3.88005 | 4.51463  |
| C | -1.2455   | -3.7329  | 4.87437  |
| C | -3.23497  | -3.16378 | 3.6092   |
| C | -3.41722  | -4.53204 | 5.59897  |
| C | -2.03931  | -4.46084 | 5.76629  |
| C | -1.84383  | -3.07071 | 3.79608  |
| H | -3.68097  | -2.63627 | 2.77445  |
| H | -4.04532  | -5.08742 | 6.28833  |
| H | -1.57544  | -4.97937 | 6.60131  |
| H | -0.16959  | -3.6828  | 5.0101   |
| C | -0.63343  | 3.59316  | -2.71936 |
| C | -1.84961  | 5.56993  | -4.29968 |
| C | -0.01948  | 4.01829  | -3.90176 |

|   |          |          |          |
|---|----------|----------|----------|
| C | -1.84461 | 4.18463  | -2.32089 |
| C | -2.46494 | 5.15746  | -3.10783 |
| C | -0.63482 | 5.00762  | -4.67856 |
| H | 0.92969  | 3.58946  | -4.20789 |
| H | -2.29629 | 3.8399   | -1.40001 |
| H | -0.15732 | 5.34393  | -5.59508 |
| H | -2.33617 | 6.32942  | -4.90349 |
| O | -3.65646 | 5.75394  | -2.80099 |
| C | -4.31205 | 5.40407  | -1.57768 |
| H | -3.58556 | 5.41494  | -0.75352 |
| H | -5.01549 | 6.22241  | -1.40025 |
| C | -5.05418 | 4.06097  | -1.64964 |
| H | -4.42452 | 3.31963  | -2.15049 |
| H | -5.96087 | 4.16874  | -2.25468 |
| C | -5.43473 | 3.55611  | -0.25118 |
| O | -7.534   | -0.41778 | 1.91948  |
| H | -7.28252 | -2.37229 | 1.27666  |
| H | -8.51425 | -2.15423 | 2.53474  |
| H | -4.54358 | 3.42463  | 0.37831  |
| H | -6.08101 | 4.28183  | 0.25283  |
| H | -0.01512 | 0.03286  | -0.57151 |
| H | -0.01637 | 0.01857  | 1.55895  |
| N | -0.02431 | 0.03826  | -1.59222 |
| N | -0.00296 | 0.00241  | 2.57859  |

#### Optimized structure of 1b

|   |           |          |          |
|---|-----------|----------|----------|
| H | -7.8953   | -0.67848 | 4.13526  |
| C | -8.51569  | -0.45751 | 3.27474  |
| H | -9.58541  | 1.08258  | 4.29517  |
| C | -9.46416  | 0.53409  | 3.36396  |
| C | -9.13172  | -0.89223 | 0.94752  |
| C | -10.29102 | 0.86061  | 2.26232  |
| C | -8.34398  | -1.17499 | 2.06239  |
| C | -10.12317 | 0.13377  | 1.03694  |
| C | -11.27858 | 1.87928  | 2.34464  |
| H | -10.87704 | -0.0901  | -0.98149 |
| C | -12.08185 | 2.17482  | 1.26848  |
| H | -11.38852 | 2.42062  | 3.28188  |
| H | -12.83541 | 2.9542   | 1.34236  |
| C | -11.92812 | 1.45231  | 0.05966  |

|   |           |          |          |
|---|-----------|----------|----------|
| H | -12.57057 | 1.68109  | -0.78693 |
| C | -10.97863 | 0.46241  | -0.05344 |
| C | -8.27842  | -1.08997 | -1.39699 |
| C | -8.93546  | -1.6714  | -0.31428 |
| C | -8.50427  | -3.11496 | -2.70635 |
| C | -9.41067  | -3.01494 | -0.43018 |
| C | -8.06062  | -1.81824 | -2.59509 |
| C | -9.19047  | -3.74903 | -1.64316 |
| C | -10.11945 | -3.66502 | 0.62058  |
| H | -7.53543  | -1.35964 | -3.42458 |
| H | -9.48751  | -5.62446 | -2.67855 |
| H | -8.33016  | -3.66845 | -3.62615 |
| C | -10.57126 | -4.95741 | 0.48226  |
| H | -10.3099  | -3.11843 | 1.53807  |
| H | -11.11316 | -5.42842 | 1.29849  |
| C | -10.3416  | -5.68139 | -0.71358 |
| H | -10.70272 | -6.70193 | -0.8076  |
| C | -9.66663  | -5.0838  | -1.75163 |
| O | -7.42033  | -2.17279 | 1.90773  |
| C | -7.30688  | 0.90216  | -2.34834 |
| C | -7.08657  | 2.34777  | -1.91956 |
| H | -6.45234  | 2.34964  | -1.02377 |
| H | -8.05229  | 2.77556  | -1.62186 |
| C | -6.43853  | 3.18931  | -3.02858 |
| H | -7.0648   | 3.18887  | -3.93012 |
| H | -5.47706  | 2.74721  | -3.3165  |
| C | -6.22416  | 4.63941  | -2.58523 |
| H | -5.69201  | 4.68568  | -1.62599 |
| H | -7.18924  | 5.13754  | -2.45014 |
| O | -5.54144  | 5.43225  | -3.56106 |
| C | -4.17584  | 5.40538  | -3.61087 |
| C | -1.37758  | 5.51982  | -3.83314 |
| C | -3.36961  | 4.54434  | -2.8601  |
| C | -3.57471  | 6.32463  | -4.48447 |
| C | -2.18884  | 6.37598  | -4.58744 |
| C | -1.97039  | 4.59541  | -2.96865 |
| H | -3.80278  | 3.81926  | -2.18227 |
| H | -4.21175  | 6.98722  | -5.06192 |
| H | -1.73169  | 7.09201  | -5.2654  |
| H | -0.29657  | 5.55769  | -3.92819 |

|   |          |          |          |
|---|----------|----------|----------|
| N | 0.00016  | -0.84045 | -0.00037 |
| N | -0.00024 | 3.31052  | -0.00014 |
| C | 0.592    | 4.08924  | 0.9643   |
| C | -0.59255 | 4.08919  | -0.96456 |
| C | -1.11633 | 2.28154  | -2.59836 |
| C | -0.61107 | 0.17189  | -2.77401 |
| C | -0.07155 | -1.61837 | -1.12911 |
| C | 0.07191  | -1.61843 | 1.12833  |
| C | 0.61125  | 0.17179  | 2.77333  |
| C | 1.11619  | 2.28153  | 2.59787  |
| C | 1.40393  | 1.90394  | 3.97807  |
| C | 1.18959  | 3.61722  | 2.14161  |
| C | 0.37806  | 5.45376  | 0.57156  |
| C | -1.18999 | 3.61716  | -2.14195 |
| C | 1.03913  | 0.60352  | 4.10032  |
| C | 0.26762  | -1.15651 | 2.44427  |
| C | 0.02796  | -2.98129 | 0.6851   |
| C | -1.40396 | 1.90405  | -3.97861 |
| C | -0.26728 | -1.1564  | -2.44504 |
| C | -0.02755 | -2.98126 | -0.68596 |
| C | -0.37875 | 5.45372  | -0.57182 |
| C | -1.03898 | 0.60369  | -4.10097 |
| H | -1.77667 | 2.56639  | -4.74763 |
| H | -0.73606 | 6.31013  | -1.12504 |
| H | 0.06804  | -3.83862 | 1.34081  |
| H | 0.73531  | 6.3102   | 1.12476  |
| H | -1.06568 | -0.01176 | -4.98866 |
| H | 1.06594  | -0.01201 | 4.98796  |
| H | -0.06762 | -3.83856 | -1.3417  |
| H | 1.77656  | 2.56627  | 4.74715  |
| C | 0.05263  | -2.16091 | 3.53298  |
| C | -0.53537 | -4.00247 | 5.57057  |
| C | 1.06509  | -2.6085  | 4.38832  |
| C | -1.25393 | -2.65436 | 3.69579  |
| C | -1.55487 | -3.56787 | 4.71021  |
| C | 0.76005  | -3.52559 | 5.40013  |
| H | 2.08155  | -2.25056 | 4.25833  |
| H | -2.02275 | -2.29032 | 3.02609  |
| H | 1.54742  | -3.87733 | 6.06161  |
| H | -0.7805  | -4.7139  | 6.35287  |

|   |          |          |          |
|---|----------|----------|----------|
| O | -2.79716 | -4.09242 | 4.93817  |
| C | -3.86994 | -3.75126 | 4.05482  |
| H | -3.52474 | -3.79021 | 3.0127   |
| H | -4.59545 | -4.55837 | 4.18953  |
| C | -4.49379 | -2.38562 | 4.37841  |
| H | -3.6884  | -1.66506 | 4.55579  |
| H | -5.04989 | -2.46137 | 5.32205  |
| C | -5.39605 | -1.83686 | 3.25876  |
| H | -4.83648 | -1.79202 | 2.31507  |
| H | -5.67392 | -0.80403 | 3.49791  |
| O | -7.85978 | 0.20247  | -1.23681 |
| C | -6.66494 | -2.659   | 3.01677  |
| H | -7.99335 | 0.85529  | -3.20619 |
| H | -6.35477 | 0.442    | -2.65154 |
| H | -6.41192 | -3.68615 | 2.73578  |
| H | -7.28798 | -2.71142 | 3.92004  |
| H | 7.8955   | -0.6778  | -4.1348  |
| C | 8.51585  | -0.45692 | -3.27423 |
| H | 9.58565  | 1.08326  | -4.29444 |
| C | 9.46434  | 0.53468  | -3.36329 |
| C | 9.13177  | -0.89189 | -0.94702 |
| C | 10.29114 | 0.86107  | -2.26158 |
| C | 8.34408  | -1.17453 | -2.06196 |
| C | 10.12322 | 0.13412  | -1.03628 |
| C | 11.27871 | 1.87975  | -2.34374 |
| H | 10.87698 | -0.08996 | 0.98217  |
| C | 12.08193 | 2.17517  | -1.2675  |
| H | 11.38871 | 2.42118  | -3.28092 |
| H | 12.8355  | 2.95455  | -1.34126 |
| C | 11.92813 | 1.45255  | -0.05876 |
| H | 12.57052 | 1.68124  | 0.78788  |
| C | 10.97862 | 0.46264  | 0.05418  |
| C | 8.27837  | -1.08991 | 1.39743  |
| C | 8.93545  | -1.67121 | 0.31468  |
| C | 8.50416  | -3.11505 | 2.70656  |
| C | 9.41064  | -3.01477 | 0.43044  |
| C | 8.06051  | -1.81832 | 2.59544  |
| C | 9.1904   | -3.749   | 1.64332  |
| C | 10.11947 | -3.66473 | -0.62038 |
| H | 7.5353   | -1.35982 | 3.42496  |



|   |          |          |          |
|---|----------|----------|----------|
| H | 9.48738  | -5.62457 | 2.6785   |
| H | 8.33001  | -3.66865 | 3.62629  |
| C | 10.57126 | -4.95714 | -0.48219 |
| H | 10.30996 | -3.11803 | -1.53779 |
| H | 11.11318 | -5.42806 | -1.29846 |
| C | 10.34154 | -5.68126 | 0.71356  |
| H | 10.70265 | -6.70181 | 0.80747  |
| C | 9.66654  | -5.08379 | 1.75165  |
| O | 7.4204   | -2.17233 | -1.90746 |
| C | 7.30666  | 0.90208  | 2.34893  |
| C | 7.08633  | 2.34772  | 1.92027  |
| H | 6.45225  | 2.34964  | 1.02437  |
| H | 8.05207  | 2.77561  | 1.62277  |
| C | 6.43804  | 3.18911  | 3.02926  |
| H | 7.06414  | 3.18862  | 3.93092  |
| H | 5.47653  | 2.74694  | 3.31695  |
| C | 6.2237   | 4.63924  | 2.586    |
| H | 5.69169  | 4.68557  | 1.62668  |
| H | 7.1888   | 5.1374   | 2.45108  |
| O | 5.54082  | 5.43201  | 3.56176  |
| C | 4.17519  | 5.4053   | 3.61118  |
| C | 1.37688  | 5.52012  | 3.83256  |
| C | 3.3691   | 4.54423  | 2.86031  |
| C | 3.57391  | 6.32475  | 4.48446  |
| C | 2.18801  | 6.37628  | 4.587    |
| C | 1.96985  | 4.59549  | 2.9684   |
| H | 3.8024   | 3.81899  | 2.18272  |
| H | 4.21084  | 6.98735  | 5.06201  |
| H | 1.73074  | 7.09246  | 5.26471  |
| H | 0.29585  | 5.55813  | 3.92727  |
| C | -0.05215 | -2.16071 | -3.53379 |
| C | 0.53613  | -4.00211 | -5.57146 |
| C | -1.06452 | -2.60828 | -4.38928 |
| C | 1.25444  | -2.65411 | -3.69651 |
| C | 1.55551  | -3.56753 | -4.71096 |
| C | -0.75934 | -3.52528 | -5.40112 |
| H | -2.081   | -2.25039 | -4.25936 |
| H | 2.02318  | -2.29009 | -3.0267  |
| H | -1.54663 | -3.87701 | -6.06271 |
| H | 0.78136  | -4.71347 | -6.35378 |

|   |          |          |          |
|---|----------|----------|----------|
| O | 2.79785  | -4.09202 | -4.93882 |
| C | 3.8705   | -3.75091 | -4.05531 |
| H | 3.52519  | -3.79    | -3.01323 |
| H | 4.59608  | -4.55796 | -4.19002 |
| C | 4.4943   | -2.38519 | -4.37865 |
| H | 3.68888  | -1.66467 | -4.55609 |
| H | 5.05056  | -2.46079 | -5.3222  |
| C | 5.39633  | -1.83646 | -3.25879 |
| H | 4.83658  | -1.79174 | -2.3152  |
| H | 5.67416  | -0.80359 | -3.4978  |
| O | 7.85975  | 0.20256  | 1.23739  |
| C | 6.66522  | -2.65853 | -3.01665 |
| H | 7.99303  | 0.85516  | 3.20686  |
| H | 6.35454  | 0.44182  | 2.65195  |
| H | 6.41223  | -3.68572 | -2.73577 |
| H | 7.28841  | -2.71084 | -3.91982 |
| H | -0.41044 | 1.20234  | -0.97857 |
| H | 0.40596  | 1.2011   | 0.97921  |
| N | 0.65113  | 1.21439  | 1.88823  |
| N | -0.65109 | 1.21441  | -1.88882 |

**Optimized structure of 1c**

|   |           |          |          |
|---|-----------|----------|----------|
| H | -11.01825 | -2.7832  | 2.52912  |
| C | -10.64198 | -2.30072 | 1.63448  |
| H | -12.55897 | -1.96134 | 0.74191  |
| C | -11.48297 | -1.85026 | 0.64414  |
| C | -8.66185  | -1.55778 | 0.38712  |
| C | -10.9566  | -1.23524 | -0.5258  |
| C | -9.2374   | -2.15241 | 1.50707  |
| C | -9.53182  | -1.09241 | -0.66154 |
| C | -11.8078  | -0.7725  | -1.56925 |
| H | -7.95837  | -0.41133 | -1.98513 |
| C | -11.28735 | -0.19952 | -2.71108 |
| H | -12.88188 | -0.88499 | -1.44888 |
| H | -11.94631 | 0.14717  | -3.50079 |
| C | -9.88244  | -0.07146 | -2.85632 |
| H | -9.47517  | 0.36753  | -3.76202 |
| C | -9.03038  | -0.50549 | -1.85997 |
| C | -6.58001  | -0.16518 | 0.38897  |
| C | -7.17601  | -1.42051 | 0.25675  |

|   |          |          |          |
|---|----------|----------|----------|
| C | -4.36272 | -1.08871 | 0.06346  |
| C | -6.33996 | -2.55994 | 0.01022  |
| C | -5.17476 | 0.0032   | 0.28969  |
| C | -4.91259 | -2.39055 | -0.08111 |
| C | -6.87128 | -3.87421 | -0.1543  |
| H | -4.72988 | 0.98431  | 0.39713  |
| H | -3.00975 | -3.38222 | -0.38137 |
| H | -3.28661 | -0.95672 | -0.00888 |
| C | -6.04196 | -4.95245 | -0.3872  |
| H | -7.94301 | -4.01578 | -0.09123 |
| H | -6.46896 | -5.94295 | -0.50961 |
| C | -4.63487 | -4.78243 | -0.4676  |
| H | -3.99723 | -5.64178 | -0.64881 |
| C | -4.08478 | -3.52631 | -0.31853 |
| O | -8.47296 | -2.72469 | 2.53619  |
| C | -6.80506 | 2.83241  | -0.73428 |
| H | -7.75262 | 2.73509  | -1.27787 |
| H | -6.06578 | 2.22544  | -1.27359 |
| C | -6.33757 | 4.30076  | -0.71418 |
| H | -5.45518 | 4.3855   | -0.05978 |
| H | -7.11617 | 4.9341   | -0.26399 |
| C | -5.96814 | 4.83115  | -2.11367 |
| H | -6.85226 | 4.85737  | -2.76247 |
| H | -5.25934 | 4.13625  | -2.58043 |
| C | -5.3384  | 6.23003  | -2.0518  |
| H | -4.62004 | 6.30426  | -1.22419 |
| H | -6.09696 | 7.00326  | -1.91257 |
| O | -4.67742 | 6.61031  | -3.30264 |
| C | -3.42926 | 6.06931  | -3.60315 |
| C | -0.93184 | 5.05549  | -4.38758 |
| C | -2.75046 | 5.15973  | -2.78469 |
| C | -2.85502 | 6.48597  | -4.8144  |
| C | -1.61038 | 5.98337  | -5.19257 |
| C | -1.50487 | 4.63297  | -3.17858 |
| H | -3.17478 | 4.82256  | -1.84887 |
| H | -3.39576 | 7.19431  | -5.43073 |
| H | -1.16249 | 6.31468  | -6.12403 |
| H | 0.03444  | 4.6685   | -4.692   |
| N | -0.00044 | -0.84664 | 0.00056  |
| N | 0.00041  | 3.16339  | 0.00071  |

|   |          |          |          |
|---|----------|----------|----------|
| C | 0.4362   | 3.9977   | 1.01424  |
| C | -0.43513 | 3.99796  | -1.01274 |
| C | -0.82339 | 2.28113  | -2.78066 |
| C | -0.44431 | 0.03646  | -2.86382 |
| C | -0.04243 | -1.6818  | -1.10294 |
| C | 0.04158  | -1.6819  | 1.10397  |
| C | 0.44396  | 0.03607  | 2.86502  |
| C | 0.82393  | 2.28062  | 2.78203  |
| C | 1.0953   | 1.82476  | 4.12082  |
| C | 0.88155  | 3.59676  | 2.29173  |
| C | 0.28051  | 5.3991   | 0.62122  |
| C | -0.88053 | 3.59727  | -2.29027 |
| C | 0.82881  | 0.47652  | 4.1796   |
| C | 0.19362  | -1.28027 | 2.44717  |
| C | 0.01335  | -3.08273 | 0.68187  |
| C | -1.09491 | 1.8255   | -4.11949 |
| C | -0.19438 | -1.28    | -2.44608 |
| C | -0.01431 | -3.08266 | -0.68098 |
| C | -0.27909 | 5.39926  | -0.61953 |
| C | -0.82895 | 0.47715  | -4.17837 |
| H | -1.43237 | 2.45763  | -4.9239  |
| H | -0.54203 | 6.25068  | -1.22746 |
| H | 0.02978  | -3.93381 | 1.34438  |
| H | 0.54369  | 6.25037  | 1.22926  |
| H | -0.91587 | -0.16925 | -5.03629 |
| H | 0.91545  | -0.16998 | 5.03747  |
| H | -0.03071 | -3.93367 | -1.34359 |
| H | 1.43304  | 2.45667  | 4.92528  |
| C | 0.08685  | -2.33831 | 3.50822  |
| C | -0.22208 | -4.35114 | 5.44656  |
| C | 1.20827  | -2.84182 | 4.18358  |
| C | -1.19268 | -2.84236 | 3.81061  |
| C | -1.34682 | -3.84967 | 4.77082  |
| C | 1.04267  | -3.84553 | 5.15033  |
| H | 2.19753  | -2.46724 | 3.94401  |
| H | -2.04464 | -2.43291 | 3.28369  |
| H | 1.91065  | -4.24039 | 5.66866  |
| H | -0.3662  | -5.1312  | 6.18471  |
| O | -2.563   | -4.43418 | 5.10877  |
| C | -3.80852 | -3.91653 | 4.53113  |

|   |          |          |          |
|---|----------|----------|----------|
| H | -3.66381 | -3.68314 | 3.46932  |
| H | -4.49424 | -4.76293 | 4.5957   |
| C | -4.3279  | -2.70613 | 5.31965  |
| H | -3.48233 | -2.04406 | 5.54652  |
| H | -4.71845 | -3.05646 | 6.28375  |
| C | -5.40324 | -1.89564 | 4.56706  |
| H | -4.93735 | -1.39125 | 3.70707  |
| H | -5.76516 | -1.09843 | 5.23222  |
| O | -7.44919 | 0.88801  | 0.68444  |
| C | -6.59422 | -2.72812 | 4.05349  |
| H | -6.25445 | -3.44214 | 3.29411  |
| H | -7.03955 | -3.31438 | 4.86827  |
| C | -7.65859 | -1.85085 | 3.39731  |
| C | -6.98881 | 2.27416  | 0.68002  |
| H | -6.06737 | 2.37157  | 1.26968  |
| H | -7.78421 | 2.80574  | 1.20827  |
| H | -8.31494 | -1.37637 | 4.13911  |
| H | -7.19821 | -1.06582 | 2.7918   |
| H | 11.01733 | -2.78483 | -2.53046 |
| C | 10.64131 | -2.30212 | -1.63582 |
| H | 12.55854 | -1.96278 | -0.74376 |
| C | 11.48257 | -1.85158 | -0.64575 |
| C | 8.66155  | -1.55879 | -0.38809 |
| C | 10.95654 | -1.23631 | 0.52421  |
| C | 9.23678  | -2.15366 | -1.50808 |
| C | 9.53181  | -1.09333 | 0.66027  |
| C | 11.80803 | -0.77344 | 1.56736  |
| H | 7.95872  | -0.41192 | 1.98414  |
| C | 11.2879  | -0.2002  | 2.70921  |
| H | 12.88207 | -0.88603 | 1.44676  |
| H | 11.94709 | 0.1466   | 3.49868  |
| C | 9.88303  | -0.07202 | 2.85479  |
| H | 9.47603  | 0.36716  | 3.76051  |
| C | 9.0307   | -0.50617 | 1.85873  |
| C | 6.57993  | -0.16589 | -0.39001 |
| C | 7.17575  | -1.42129 | -0.25757 |
| C | 4.36254  | -1.08895 | -0.06392 |
| C | 6.33953  | -2.56051 | -0.01063 |
| C | 5.17473  | 0.00276  | -0.29057 |
| C | 4.91221  | -2.39085 | 0.08089  |

|   |          |          |          |
|---|----------|----------|----------|
| C | 6.87066  | -3.87482 | 0.15418  |
| H | 4.73002  | 0.98393  | -0.39817 |
| H | 3.00926  | -3.3821  | 0.38173  |
| H | 3.28647  | -0.95675 | 0.00859  |
| C | 6.0412   | -4.95285 | 0.38751  |
| H | 7.94235  | -4.01659 | 0.091    |
| H | 6.46805  | -5.94339 | 0.51013  |
| C | 4.63414  | -4.78258 | 0.46807  |
| H | 3.99639  | -5.64176 | 0.6496   |
| C | 4.08425  | -3.5264  | 0.31875  |
| O | 8.47183  | -2.7259  | -2.53686 |
| C | 6.80565  | 2.8313   | 0.73335  |
| H | 7.75329  | 2.73379  | 1.27675  |
| H | 6.06641  | 2.22427  | 1.27267  |
| C | 6.33826  | 4.29969  | 0.71365  |
| H | 5.45574  | 4.38462  | 0.05944  |
| H | 7.11682  | 4.93307  | 0.26343  |
| C | 5.96917  | 4.82985  | 2.11332  |
| H | 6.85341  | 4.85578  | 2.76197  |
| H | 5.26033  | 4.13498  | 2.58007  |
| C | 5.33969  | 6.22885  | 2.05183  |
| H | 4.62109  | 6.30333  | 1.22444  |
| H | 6.09838  | 7.00193  | 1.91241  |
| O | 4.67921  | 6.60918  | 3.30291  |
| C | 3.43118  | 6.06818  | 3.60397  |
| C | 0.93402  | 5.0545   | 4.38938  |
| C | 2.75185  | 5.15889  | 2.78562  |
| C | 2.85761  | 6.48461  | 4.81561  |
| C | 1.61309  | 5.98207  | 5.19427  |
| C | 1.50639  | 4.63218  | 3.18     |
| H | 3.17567  | 4.82189  | 1.84952  |
| H | 3.39875  | 7.19272  | 5.43185  |
| H | 1.1657   | 6.31322  | 6.12603  |
| H | -0.03219 | 4.66761  | 4.69418  |
| C | -0.0879  | -2.33793 | -3.50727 |
| C | 0.22038  | -4.35059 | -5.44587 |
| C | -1.20959 | -2.84162 | -4.18204 |
| C | 1.19157  | -2.84167 | -3.8104  |
| C | 1.3454   | -3.8489  | -4.77074 |
| C | -1.04432 | -3.84526 | -5.14893 |

|   |          |          |          |
|---|----------|----------|----------|
| H | -2.19879 | -2.46725 | -3.94188 |
| H | 2.04372  | -2.43207 | -3.2839  |
| H | -1.91249 | -4.24029 | -5.66679 |
| H | 0.36427  | -5.13059 | -6.18413 |
| O | 2.56151  | -4.43305 | -5.10948 |
| C | 3.80716  | -3.91577 | -4.53178 |
| H | 3.6625   | -3.68242 | -3.46995 |
| H | 4.49268  | -4.76233 | -4.59642 |
| C | 4.32682  | -2.70542 | -5.32021 |
| H | 3.48144  | -2.04302 | -5.54684 |
| H | 4.71707  | -3.05574 | -6.28444 |
| C | 5.40258  | -1.89541 | -4.56767 |
| H | 4.93704  | -1.39113 | -3.70743 |
| H | 5.76458  | -1.09813 | -5.23269 |
| O | 7.44922  | 0.88711  | -0.68587 |
| C | 6.59345  | -2.72837 | -4.05461 |
| H | 6.25361  | -3.44253 | -3.2954  |
| H | 7.03845  | -3.3145  | -4.86967 |
| C | 7.6582   | -1.85165 | -3.39827 |
| C | 6.9891   | 2.27333  | -0.6811  |
| H | 6.06759  | 2.37104  | -1.2706  |
| H | 7.78453  | 2.80488  | -1.20934 |
| H | 8.315    | -1.37759 | -4.13994 |
| H | 7.19815  | -1.06629 | -2.7929  |
| H | 0.20345  | 1.16923  | 1.07332  |
| H | -0.20339 | 1.16938  | -1.07202 |
| N | 0.44228  | 1.16275  | 2.05946  |
| N | -0.44222 | 1.16307  | -2.05816 |

**Optimized structure of 1d**

|   |         |          |         |
|---|---------|----------|---------|
| C | 0.3759  | -2.30944 | 2.18606 |
| C | 0.49163 | -2.19807 | 3.6389  |
| H | 0.53695 | -3.02833 | 4.32593 |
| C | 0.47703 | -0.86845 | 3.93595 |
| H | 0.51667 | -0.40934 | 4.91085 |
| C | 0.39558 | -0.15122 | 2.66382 |
| N | 0.33128 | -1.05093 | 1.61009 |
| C | 0.37807 | 1.25349  | 2.54772 |
| C | 0.39336 | 1.962    | 1.33306 |
| C | 0.54258 | 3.3837   | 1.16909 |

|   |          |          |          |
|---|----------|----------|----------|
| H | 0.63041  | 4.084    | 1.98314  |
| C | 0.57072  | 3.6624   | -0.17678 |
| H | 0.6714   | 4.62905  | -0.6416  |
| C | 0.41865  | 2.426    | -0.89651 |
| N | 0.32139  | 1.42683  | 0.05758  |
| H | 0.20816  | 0.44205  | -0.15277 |
| C | 0.31294  | 2.26755  | -2.28999 |
| C | -0.01127 | 1.05939  | -2.93949 |
| C | -0.21399 | 0.93424  | -4.38296 |
| H | -0.11071 | 1.73266  | -5.10026 |
| C | -0.56085 | -0.36052 | -4.62182 |
| H | -0.79301 | -0.81853 | -5.57019 |
| C | -0.52847 | -1.05303 | -3.33449 |
| N | -0.19944 | -0.16813 | -2.32129 |
| C | -0.75533 | -2.43705 | -3.19053 |
| C | -0.58548 | -3.1672  | -2.00488 |
| C | -0.65342 | -4.59813 | -1.85508 |
| H | -0.89626 | -5.28105 | -2.65283 |
| C | -0.33102 | -4.91178 | -0.55616 |
| H | -0.27396 | -5.89299 | -0.11379 |
| C | -0.08004 | -3.685   | 0.15461  |
| N | -0.24385 | -2.65919 | -0.76264 |
| H | -0.11904 | -1.67573 | -0.55255 |
| C | 0.23703  | -3.54096 | 1.51233  |
| C | 0.26836  | 2.07911  | 3.79634  |
| C | -0.93786 | 2.77306  | 4.01548  |
| H | -1.72963 | 2.68063  | 3.28425  |
| C | -1.11159 | 3.54434  | 5.17012  |
| C | -0.08286 | 3.62686  | 6.1224   |
| H | -0.24025 | 4.22967  | 7.00899  |
| C | 1.11169  | 2.94216  | 5.90209  |
| H | 1.91071  | 3.01429  | 6.63315  |
| C | 1.29794  | 2.1704   | 4.74472  |
| H | 2.23653  | 1.654    | 4.57541  |
| C | 0.56778  | 3.49077  | -3.12143 |
| C | -0.45452 | 4.1126   | -3.85507 |
| H | -1.46261 | 3.71477  | -3.81637 |
| C | -0.17018 | 5.25107  | -4.62327 |
| H | -0.96357 | 5.73156  | -5.18697 |
| C | 1.11865  | 5.77971  | -4.66426 |



|   |          |          |          |
|---|----------|----------|----------|
| H | 1.357    | 6.66017  | -5.24921 |
| C | 2.14282  | 5.16372  | -3.92692 |
| C | 1.87216  | 4.02356  | -3.16049 |
| H | 2.65706  | 3.52312  | -2.60772 |
| C | -1.22234 | -3.20492 | -4.39688 |
| C | -2.5957  | -3.48755 | -4.51829 |
| H | -3.26185 | -3.15934 | -3.7311  |
| C | -3.08202 | -4.15852 | -5.64772 |
| C | -2.19477 | -4.56764 | -6.65611 |
| H | -2.59438 | -5.088   | -7.51846 |
| C | -0.83301 | -4.29878 | -6.5266  |
| H | -0.14867 | -4.62001 | -7.30536 |
| C | -0.33834 | -3.61665 | -5.4046  |
| H | 0.72092  | -3.4028  | -5.31309 |
| C | 0.44445  | -4.79692 | 2.31213  |
| C | -0.62934 | -5.55401 | 2.80224  |
| H | -1.64767 | -5.2476  | 2.58927  |
| C | -0.37657 | -6.68973 | 3.58687  |
| H | -1.20711 | -7.27269 | 3.97201  |
| C | 0.92924  | -7.07656 | 3.88486  |
| H | 1.14138  | -7.94917 | 4.49124  |
| C | 2.0066   | -6.32614 | 3.38681  |
| C | 1.76372  | -5.19319 | 2.59999  |
| H | 2.57712  | -4.59808 | 2.2064   |
| O | -2.26824 | 4.26219  | 5.44506  |
| C | -3.32055 | 4.30435  | 4.42438  |
| H | -3.72689 | 3.29628  | 4.28221  |
| H | -2.88196 | 4.6424   | 3.47486  |
| C | -4.38218 | 5.29189  | 4.89748  |
| H | -4.92638 | 4.87015  | 5.75209  |
| H | -3.86432 | 6.18838  | 5.26016  |
| C | -5.36103 | 5.68702  | 3.77208  |
| H | -4.78018 | 6.06519  | 2.91613  |
| H | -5.97269 | 6.53195  | 4.11941  |
| C | -6.2999  | 4.56238  | 3.28812  |
| H | -6.97532 | 4.27616  | 4.10865  |
| H | -5.73568 | 3.66061  | 3.02475  |
| C | -7.12446 | 5.00164  | 2.06472  |
| H | -7.61941 | 5.96165  | 2.27721  |
| H | -6.45325 | 5.17406  | 1.21305  |

|   |          |          |          |
|---|----------|----------|----------|
| C | -8.20875 | 4.01873  | 1.64142  |
| H | -8.9165  | 3.8372   | 2.46289  |
| H | -8.76611 | 4.41326  | 0.7814   |
| O | -7.56118 | 2.76255  | 1.27269  |
| C | -7.19487 | -0.68471 | -3.88237 |
| H | -7.86187 | -0.50085 | -3.03313 |
| H | -7.78721 | -0.52563 | -4.79501 |
| C | -5.80628 | -2.58584 | -4.97928 |
| H | -6.2918  | -2.41042 | -5.94819 |
| H | -4.89381 | -1.97738 | -4.97294 |
| C | 4.457    | -6.14586 | 3.14676  |
| H | 4.28329  | -5.96509 | 2.07743  |
| H | 5.23792  | -6.9043  | 3.23987  |
| C | 4.8588   | -4.85401 | 3.86746  |
| H | 3.97801  | -4.21056 | 3.97617  |
| H | 5.19424  | -5.09714 | 4.88397  |
| C | 5.96785  | -4.1083  | 3.09884  |
| H | 5.62955  | -3.91065 | 2.0711   |
| H | 6.84561  | -4.76346 | 3.00165  |
| C | 7.69045  | 3.72196  | -0.17048 |
| H | 8.25682  | 3.59378  | -1.1029  |
| H | 8.35587  | 4.16834  | 0.5807   |
| C | 6.45568  | 4.5964   | -0.37389 |
| H | 5.72879  | 4.018    | -0.95509 |
| H | 5.99845  | 4.7829   | 0.60534  |
| C | 6.78578  | 5.93143  | -1.0801  |
| H | 6.00048  | 6.6652   | -0.85237 |
| H | 7.7078   | 6.34292  | -0.64393 |
| C | 6.94381  | 5.82458  | -2.62137 |
| H | 7.27428  | 4.81124  | -2.89307 |
| H | 7.74126  | 6.50172  | -2.9531  |
| C | 4.49311  | 5.24829  | -3.19305 |
| H | 4.73363  | 4.21833  | -3.48832 |
| H | 4.17528  | 5.24587  | -2.14302 |
| C | 5.67374  | 6.18531  | -3.42425 |
| H | 5.35871  | 7.20636  | -3.17173 |
| H | 5.90475  | 6.18321  | -4.49684 |
| C | -8.34672 | 1.67704  | 0.88474  |
| C | -9.74863 | 1.79347  | 0.69185  |
| H | -10.2439 | 2.74394  | 0.84232  |

|   |           |          |          |
|---|-----------|----------|----------|
| C | -10.48793 | 0.69698  | 0.3036   |
| H | -11.55967 | 0.79115  | 0.15359  |
| C | -9.87276  | -0.56514 | 0.10001  |
| C | -10.62468 | -1.71175 | -0.28647 |
| H | -11.69548 | -1.6026  | -0.43652 |
| C | -10.01386 | -2.93539 | -0.46201 |
| H | -10.59634 | -3.80372 | -0.75312 |
| C | -8.61516  | -3.06054 | -0.2524  |
| H | -8.14008  | -4.0286  | -0.3793  |
| C | -7.85696  | -1.96805 | 0.11738  |
| H | -6.79168  | -2.07619 | 0.28343  |
| C | -8.45284  | -0.68372 | 0.30199  |
| C | -7.68781  | 0.46429  | 0.69191  |
| C | -6.21184  | 0.3538   | 0.90347  |
| C | -5.35086  | 0.31047  | -0.19233 |
| C | -3.95054  | 0.14546  | -0.02806 |
| H | -3.29152  | 0.10891  | -0.88689 |
| C | -3.41466  | 0.0256   | 1.23687  |
| H | -2.34604  | -0.12462 | 1.35656  |
| C | -4.24211  | 0.07699  | 2.38998  |
| C | -3.70246  | -0.04165 | 3.704    |
| H | -2.63042  | -0.17675 | 3.81485  |
| C | -4.52119  | 0.00448  | 4.81403  |
| H | -4.09995  | -0.08771 | 5.81001  |
| C | -5.92273  | 0.16394  | 4.65134  |
| H | -6.56324  | 0.19174  | 5.52771  |
| C | -6.47719  | 0.27767  | 3.3926   |
| H | -7.54876  | 0.39068  | 3.27806  |
| C | -5.66186  | 0.24414  | 2.22138  |
| O | -5.94446  | 0.42502  | -1.44839 |
| C | -5.13044  | 0.27678  | -2.65112 |
| H | -4.60588  | -0.68741 | -2.6218  |
| H | -4.37607  | 1.07336  | -2.68918 |
| C | -6.06698  | 0.36955  | -3.85205 |
| H | -6.52136  | 1.36826  | -3.85912 |
| H | -5.44851  | 0.30057  | -4.75804 |
| C | -6.73737  | -2.15738 | -3.82788 |
| H | -7.63373  | -2.79431 | -3.82917 |
| H | -6.24214  | -2.34745 | -2.86475 |
| C | -5.42675  | -4.06651 | -4.87341 |

|   |          |          |          |
|---|----------|----------|----------|
| H | -5.07218 | -4.31664 | -3.86448 |
| H | -6.28234 | -4.70716 | -5.09909 |
| O | -4.42122 | -4.4692  | -5.86069 |
| O | 3.2739   | -6.78874 | 3.72592  |
| C | 6.42512  | -2.78231 | 3.74263  |
| H | 6.86252  | -2.99185 | 4.72946  |
| H | 7.2233   | -2.35947 | 3.12305  |
| C | 5.32699  | -1.71093 | 3.91887  |
| H | 5.78633  | -0.80377 | 4.33103  |
| H | 4.57603  | -2.04232 | 4.6495   |
| C | 4.58415  | -1.33689 | 2.63957  |
| H | 4.06295  | -2.20281 | 2.21153  |
| H | 3.8378   | -0.55659 | 2.83591  |
| O | 5.57479  | -0.84267 | 1.68747  |
| C | 5.18295  | -0.49302 | 0.39687  |
| C | 3.83504  | -0.58412 | -0.03889 |
| H | 3.05418  | -0.91576 | 0.63442  |
| C | 3.50203  | -0.22537 | -1.32779 |
| H | 2.46952  | -0.29605 | -1.65688 |
| C | 4.48968  | 0.23886  | -2.23666 |
| C | 4.15844  | 0.62181  | -3.56877 |
| H | 3.12238  | 0.5472   | -3.88702 |
| C | 5.12848  | 1.07533  | -4.43992 |
| H | 4.86589  | 1.36063  | -5.45374 |
| C | 6.47986  | 1.15471  | -4.01037 |
| H | 7.24275  | 1.49586  | -4.70403 |
| C | 6.8333   | 0.79134  | -2.72594 |
| H | 7.86983  | 0.84329  | -2.41277 |
| C | 5.85593  | 0.3296   | -1.79306 |
| C | 6.19233  | -0.04221 | -0.45137 |
| C | 7.5958   | 0.08757  | 0.04665  |
| C | 8.45686  | -1.05105 | 0.17671  |
| C | 8.02726  | -2.3705  | -0.15407 |
| H | 7.0145   | -2.51172 | -0.51303 |
| C | 8.87959  | -3.44965 | -0.03087 |
| H | 8.5328   | -4.44466 | -0.29261 |
| C | 10.21034 | -3.27164 | 0.42988  |
| H | 10.86849 | -4.12969 | 0.52305  |
| C | 10.66179 | -2.00846 | 0.75125  |
| H | 11.68029 | -1.85874 | 1.09943  |

|   |          |          |          |
|---|----------|----------|----------|
| C | 9.81047  | -0.87293 | 0.63202  |
| C | 10.26529 | 0.43726  | 0.94209  |
| H | 11.28702 | 0.57135  | 1.28577  |
| C | 9.4299   | 1.52537  | 0.81424  |
| H | 9.78508  | 2.51737  | 1.06769  |
| C | 8.09399  | 1.34557  | 0.37237  |
| O | 7.20466  | 2.41855  | 0.27982  |
| O | 3.3956   | 5.7557   | -4.02055 |

**Optimized structure of 2a**

|   |          |          |          |
|---|----------|----------|----------|
| H | 3.56375  | -1.707   | -0.45622 |
| C | 4.26073  | -0.89369 | -0.62035 |
| H | 2.7004   | 0.50118  | -1.03527 |
| C | 3.77213  | 0.34831  | -0.95132 |
| C | 6.54695  | -0.03591 | -0.60536 |
| C | 4.64379  | 1.44066  | -1.18107 |
| C | 5.65585  | -1.0959  | -0.46186 |
| C | 6.05452  | 1.24141  | -1.01506 |
| C | 4.15617  | 2.719    | -1.56618 |
| H | 7.99156  | 2.20186  | -1.18934 |
| C | 5.01988  | 3.76338  | -1.8035  |
| H | 3.08261  | 2.85468  | -1.67015 |
| H | 4.63645  | 4.73589  | -2.09978 |
| C | 6.41584  | 3.56577  | -1.66774 |
| H | 7.09738  | 4.38712  | -1.87453 |
| C | 6.91938  | 2.3434   | -1.2811  |
| C | 8.42711  | 0.04821  | 1.02191  |
| C | 7.99062  | -0.2311  | -0.2653  |
| C | 10.70052 | -0.58494 | 0.48392  |
| C | 8.93707  | -0.71266 | -1.22674 |
| C | 9.78239  | -0.12724 | 1.39674  |
| C | 10.30922 | -0.88794 | -0.84705 |
| C | 8.56394  | -1.02074 | -2.56418 |
| H | 10.066   | 0.08671  | 2.42323  |
| H | 12.27697 | -1.49416 | -1.50821 |
| H | 11.73923 | -0.72718 | 0.77292  |
| C | 9.49175  | -1.47818 | -3.47336 |
| H | 7.52897  | -0.88383 | -2.86111 |
| H | 9.18448  | -1.7057  | -4.49079 |
| C | 10.84433 | -1.65412 | -3.09489 |

|   |          |          |          |
|---|----------|----------|----------|
| H | 11.56666 | -2.01665 | -3.82132 |
| C | 11.23981 | -1.36387 | -1.80915 |
| O | 6.20889  | -2.3039  | -0.1265  |
| C | 7.49482  | 1.85915  | 2.25131  |
| C | 6.41689  | 2.13481  | 3.29876  |
| H | 6.76728  | 1.84737  | 4.29637  |
| H | 5.54607  | 1.51324  | 3.0675   |
| C | 6.04617  | 3.62259  | 3.29947  |
| H | 5.50122  | 3.89296  | 2.38571  |
| H | 6.95573  | 4.23237  | 3.33357  |
| O | 5.31085  | 4.03785  | 4.45377  |
| C | 3.95276  | 3.90598  | 4.49994  |
| C | 1.17007  | 3.73084  | 4.81966  |
| C | 3.18257  | 3.18903  | 3.57845  |
| C | 3.32394  | 4.54452  | 5.5804   |
| C | 1.9447   | 4.45908  | 5.72849  |
| C | 1.78984  | 3.08434  | 3.74474  |
| H | 3.64456  | 2.67387  | 2.74498  |
| H | 3.93724  | 5.10092  | 6.28214  |
| H | 1.46458  | 4.96654  | 6.56109  |
| H | 0.09315  | 3.66616  | 4.94156  |
| N | -0.37834 | -1.90943 | 0.41702  |
| N | 0.37852  | 1.9097   | 0.41738  |
| C | 0.17981  | 2.78381  | -0.6117  |
| C | 0.86392  | 2.66037  | 1.45257  |
| C | 0.53237  | 0.9985   | 3.26936  |
| C | -0.53232 | -0.99858 | 3.26915  |
| C | -0.86362 | -2.66028 | 1.45213  |
| C | -0.17953 | -2.78342 | -0.61216 |
| C | 0.14843  | -1.1242  | -2.43715 |
| C | -0.14842 | 1.12488  | -2.43693 |
| C | -0.12428 | 0.67605  | -3.79859 |
| C | -0.18457 | 2.43984  | -1.93638 |
| C | 0.53794  | 4.14171  | -0.21449 |
| C | 1.04007  | 2.2163   | 2.7817   |
| C | 0.12438  | -0.67511 | -3.79872 |
| C | 0.18475  | -2.43922 | -1.93681 |
| C | -0.53748 | -4.14141 | -0.21508 |
| C | 0.34822  | 0.59087  | 4.63334  |
| C | -1.03987 | -2.21636 | 2.78129  |

|   |          |          |          |
|---|----------|----------|----------|
| C | -1.01239 | -4.05435 | 1.05411  |
| C | 1.01285  | 4.05447  | 1.05468  |
| C | -0.3481  | -0.59129 | 4.63321  |
| H | 0.67704  | 1.15666  | 5.49209  |
| H | 1.38842  | 4.85027  | 1.68289  |
| H | -0.47134 | -5.01885 | -0.84349 |
| H | 0.47191  | 5.01924  | -0.84279 |
| H | -0.67682 | -1.15732 | 5.49184  |
| H | 0.23968  | -1.31614 | -4.6599  |
| H | -1.38785 | -4.85024 | 1.68227  |
| H | -0.23957 | 1.31727  | -4.65964 |
| C | 0.719    | -3.52155 | -2.8192  |
| C | 2.00831  | -5.45556 | -4.39711 |
| C | 0.14372  | -3.93824 | -4.02384 |
| C | 1.93059  | -4.09928 | -2.40032 |
| C | 2.58602  | -5.05087 | -3.18406 |
| C | 0.79501  | -4.90562 | -4.79884 |
| H | -0.80619 | -3.52381 | -4.34712 |
| H | 2.35534  | -3.75997 | -1.46511 |
| H | 0.34575  | -5.23613 | -5.7316  |
| H | 2.52122  | -6.19887 | -4.9992  |
| O | 3.77951  | -5.63053 | -2.85454 |
| C | 4.37897  | -5.31376 | -1.59401 |
| H | 3.61569  | -5.34684 | -0.80431 |
| H | 5.07499  | -6.13667 | -1.40837 |
| C | 5.12344  | -3.96947 | -1.59561 |
| H | 4.52129  | -3.21508 | -2.11093 |
| H | 6.06156  | -4.06251 | -2.15342 |
| C | 5.43017  | -3.49742 | -0.16815 |
| O | 7.52539  | 0.45045  | 1.99043  |
| H | 7.27127  | 2.39667  | 1.32063  |
| H | 8.47929  | 2.2011   | 2.6055   |
| H | 4.50678  | -3.37905 | 0.41584  |
| H | 6.04858  | -4.23431 | 0.35406  |
| H | -3.56416 | 1.70709  | -0.45809 |
| C | -4.26112 | 0.89363  | -0.62155 |
| H | -2.70077 | -0.50128 | -1.03629 |
| C | -3.77249 | -0.34849 | -0.95209 |
| C | -6.54725 | 0.03563  | -0.60561 |
| C | -4.6441  | -1.44101 | -1.18115 |

|   |           |          |          |
|---|-----------|----------|----------|
| C | -5.65621  | 1.09576  | -0.46274 |
| C | -6.05481  | -1.24181 | -1.01492 |
| C | -4.15645  | -2.71948 | -1.56582 |
| H | -7.99181  | -2.20244 | -1.18858 |
| C | -5.02012  | -3.76402 | -1.80255 |
| H | -3.0829   | -2.85511 | -1.66996 |
| H | -4.63667  | -4.73662 | -2.09849 |
| C | -6.41608  | -3.56644 | -1.66665 |
| H | -7.0976   | -4.38792 | -1.87303 |
| C | -6.91963  | -2.34396 | -1.28042 |
| C | -8.42717  | -0.04841 | 1.02196  |
| C | -7.99087  | 0.2308   | -0.26534 |
| C | -10.7007  | 0.5845   | 0.48422  |
| C | -8.9375   | 0.71219  | -1.22669 |
| C | -9.7824   | 0.12698  | 1.39697  |
| C | -10.30961 | 0.88738  | -0.84684 |
| C | -8.56459  | 1.02013  | -2.56422 |
| H | -10.06587 | -0.08684 | 2.42352  |
| H | -12.27751 | 1.49333  | -1.50778 |
| H | -11.73938 | 0.7267   | 0.77335  |
| C | -9.49258  | 1.47737  | -3.47332 |
| H | -7.52965  | 0.88328  | -2.86129 |
| H | -9.18547  | 1.7048   | -4.49083 |
| C | -10.84511 | 1.65324  | -3.09469 |
| H | -11.56758 | 2.0156   | -3.82107 |
| C | -11.24038 | 1.36311  | -1.80886 |
| O | -6.20934  | 2.30384  | -0.12783 |
| C | -7.49509  | -1.85907 | 2.25193  |
| C | -6.41672  | -2.13468 | 3.29896  |
| H | -6.76666  | -1.84725 | 4.29672  |
| H | -5.54599  | -1.51313 | 3.0673   |
| C | -6.04601  | -3.62248 | 3.29953  |
| H | -5.50118  | -3.89278 | 2.38568  |
| H | -6.95557  | -4.23226 | 3.3337   |
| O | -5.31055  | -4.03781 | 4.45372  |
| C | -3.95243  | -3.90616 | 4.49964  |
| C | -1.16965  | -3.7315  | 4.81882  |
| C | -3.18234  | -3.18901 | 3.57822  |
| C | -3.32347  | -4.54514 | 5.57975  |
| C | -1.94418  | -4.45993 | 5.72759  |



|    |          |          |          |
|----|----------|----------|----------|
| C  | -1.78957 | -3.08459 | 3.74425  |
| H  | -3.64444 | -2.67355 | 2.74499  |
| H  | -3.93669 | -5.1017  | 6.28143  |
| H  | -1.46395 | -4.96772 | 6.55993  |
| H  | -0.0927  | -3.66695 | 4.94053  |
| C  | -0.71874 | 3.52236  | -2.81859 |
| C  | -2.0079  | 5.45672  | -4.3962  |
| C  | -0.14344 | 3.9392   | -4.02318 |
| C  | -1.93027 | 4.10015  | -2.39961 |
| C  | -2.58564 | 5.0519   | -3.18321 |
| C  | -0.79464 | 4.90675  | -4.79801 |
| H  | 0.80643  | 3.52472  | -4.34652 |
| H  | -2.35501 | 3.76079  | -1.46441 |
| H  | -0.34536 | 5.23738  | -5.73073 |
| H  | -2.52076 | 6.20015  | -4.99818 |
| O  | -3.77906 | 5.63164  | -2.85358 |
| C  | -4.37887 | 5.31427  | -1.59336 |
| H  | -3.61582 | 5.34701  | -0.80343 |
| H  | -5.07496 | 6.13708  | -1.40755 |
| C  | -5.12332 | 3.96997  | -1.59579 |
| H  | -4.52105 | 3.21583  | -2.11132 |
| H  | -6.06131 | 4.0633   | -2.15377 |
| C  | -5.43041 | 3.49724  | -0.16863 |
| O  | -7.52523 | -0.45047 | 1.99037  |
| H  | -7.27224 | -2.39712 | 1.32138  |
| H  | -8.4795  | -2.20046 | 2.60681  |
| H  | -4.50718 | 3.37839  | 0.41549  |
| H  | -6.04881 | 4.23398  | 0.35383  |
| N  | -0.00003 | 0.00027  | -1.66049 |
| N  | 0.00001  | 0.00005  | 2.49347  |
| Zn | 0.00004  | 0.00015  | 0.41685  |

### Optimized structure of 2b

|   |          |          |          |
|---|----------|----------|----------|
| H | 7.96825  | -0.67056 | -4.09554 |
| C | 8.58818  | -0.41361 | -3.24476 |
| H | 9.60079  | 1.13861  | -4.30429 |
| C | 9.50453  | 0.60499  | -3.3616  |
| C | 9.2373   | -0.78339 | -0.91551 |
| C | 10.33036 | 0.97833  | -2.27421 |
| C | 8.44915  | -1.11233 | -2.01728 |

|   |          |          |          |
|---|----------|----------|----------|
| C | 10.19576 | 0.27054  | -1.03368 |
| C | 11.28514 | 2.02518  | -2.38498 |
| H | 10.97345 | 0.10875  | 0.9815   |
| C | 12.08817 | 2.36597  | -1.3221  |
| H | 11.37025 | 2.55151  | -3.3333  |
| H | 12.8165  | 3.16668  | -1.41778 |
| C | 11.9674  | 1.66255  | -0.09835 |
| H | 12.60984 | 1.92726  | 0.7377   |
| C | 11.04999 | 0.6463   | 0.04233  |
| C | 8.40323  | -0.96243 | 1.43718  |
| C | 9.07494  | -1.54271 | 0.36301  |
| C | 8.70379  | -2.95217 | 2.78511  |
| C | 9.59681  | -2.86645 | 0.50322  |
| C | 8.21542  | -1.67384 | 2.6504   |
| C | 9.40702  | -3.58338 | 1.73145  |
| C | 10.323   | -3.51249 | -0.53812 |
| H | 7.67834  | -1.21733 | 3.47337  |
| H | 9.77283  | -5.42666 | 2.80211  |
| H | 8.55249  | -3.49289 | 3.71646  |
| C | 10.81955 | -4.78564 | -0.37656 |
| H | 10.49048 | -2.97813 | -1.46723 |
| H | 11.37378 | -5.25398 | -1.186   |
| C | 10.61994 | -5.49315 | 0.83445  |
| H | 11.01625 | -6.49868 | 0.94674  |
| C | 9.92927  | -4.89863 | 1.86388  |
| O | 7.55908  | -2.13556 | -1.83483 |
| C | 7.36335  | 1.0105   | 2.35343  |
| C | 7.08856  | 2.4401   | 1.9025   |
| H | 6.45542  | 2.40542  | 1.00667  |
| H | 8.03737  | 2.90075  | 1.59963  |
| C | 6.40794  | 3.26943  | 3.0011   |
| H | 7.0306   | 3.29795  | 3.90472  |
| H | 5.46126  | 2.79648  | 3.28936  |
| C | 6.14376  | 4.70841  | 2.54867  |
| H | 5.60906  | 4.73229  | 1.59006  |
| H | 7.09061  | 5.23915  | 2.40955  |
| O | 5.43719  | 5.48104  | 3.52362  |
| C | 4.0754   | 5.38856  | 3.59624  |
| C | 1.28004  | 5.36073  | 3.87721  |
| C | 3.29562  | 4.5098   | 2.83777  |

|   |          |          |          |
|---|----------|----------|----------|
| C | 3.44903  | 6.25548  | 4.5048   |
| C | 2.06477  | 6.23704  | 4.63642  |
| C | 1.89822  | 4.49067  | 2.97526  |
| H | 3.74897  | 3.8251   | 2.13148  |
| H | 4.0655   | 6.93309  | 5.08715  |
| H | 1.58809  | 6.91385  | 5.34069  |
| H | 0.20027  | 5.34663  | 3.99048  |
| N | 0.00002  | -0.89425 | -0.00007 |
| N | -0.00003 | 3.0807   | -0.00002 |
| C | -0.55565 | 3.90687  | -0.934   |
| C | 0.55556  | 3.90687  | 0.93398  |
| C | 1.09155  | 2.18235  | 2.65062  |
| C | 0.56904  | -0.0134  | 2.82159  |
| C | 0.03795  | -1.71971 | 1.08747  |
| C | -0.03789 | -1.71969 | -1.08762 |
| C | -0.56901 | -0.01336 | -2.8217  |
| C | -1.09158 | 2.18238  | -2.65069 |
| C | -1.33819 | 1.76912  | -4.00222 |
| C | -1.14617 | 3.49231  | -2.14461 |
| C | -0.36742 | 5.30882  | -0.56967 |
| C | 1.14611  | 3.4923   | 2.14458  |
| C | -0.97626 | 0.45092  | -4.1171  |
| C | -0.21019 | -1.31497 | -2.43155 |
| C | -0.0043  | -3.11915 | -0.67832 |
| C | 1.33818  | 1.76906  | 4.00214  |
| C | 0.21024  | -1.31501 | 2.43141  |
| C | 0.0044   | -3.11917 | 0.67814  |
| C | 0.36731  | 5.30882  | 0.56967  |
| C | 0.97628  | 0.45085  | 4.11699  |
| H | 1.69267  | 2.42414  | 4.78475  |
| H | 0.72363  | 6.15898  | 1.13467  |
| H | -0.02382 | -3.97073 | -1.34376 |
| H | -0.72376 | 6.15898  | -1.13466 |
| H | 0.9983   | -0.15937 | 5.00759  |
| H | -0.99826 | -0.15928 | -5.00771 |
| H | 0.02393  | -3.97075 | 1.34356  |
| H | -1.6927  | 2.42421  | -4.78481 |
| C | 0.04926  | -2.32336 | -3.50567 |
| C | 0.72735  | -4.1535  | -5.52475 |
| C | -0.92951 | -2.78448 | -4.39264 |

|   |           |          |          |
|---|-----------|----------|----------|
| C | 1.36783   | -2.79556 | -3.62857 |
| C | 1.71372   | -3.70234 | -4.63443 |
| C | -0.58006  | -3.69772 | -5.39368 |
| H | -1.95561  | -2.44442 | -4.29246 |
| H | 2.1086    | -2.42095 | -2.93377 |
| H | -1.34152  | -4.06236 | -6.07815 |
| H | 1.00758   | -4.86022 | -6.29949 |
| O | 2.97068   | -4.20466 | -4.82797 |
| C | 4.02053   | -3.82261 | -3.93365 |
| H | 3.6629    | -3.85865 | -2.89573 |
| H | 4.77035   | -4.61032 | -4.04869 |
| C | 4.60918   | -2.44426 | -4.26755 |
| H | 3.78542   | -1.74418 | -4.44255 |
| H | 5.16007   | -2.51218 | -5.21491 |
| C | 5.50662   | -1.86803 | -3.1579  |
| H | 4.95442   | -1.83215 | -2.20959 |
| H | 5.7567    | -0.82995 | -3.40486 |
| O | 7.94015   | 0.312    | 1.25375  |
| C | 6.79829   | -2.65623 | -2.92438 |
| H | 8.05198   | 1.00374  | 3.21081  |
| H | 6.42937   | 0.52054  | 2.66661  |
| H | 6.57458   | -3.68476 | -2.6245  |
| H | 7.40824   | -2.70728 | -3.83665 |
| H | -7.96815  | -0.6707  | 4.0956   |
| C | -8.5881   | -0.41373 | 3.24484  |
| H | -9.60067  | 1.13848  | 4.30444  |
| C | -9.50443  | 0.60488  | 3.36173  |
| C | -9.23728  | -0.78344 | 0.9156   |
| C | -10.33029 | 0.97826  | 2.27437  |
| C | -8.4491   | -1.11242 | 2.01734  |
| C | -10.19574 | 0.27049  | 1.03382  |
| C | -11.28506 | 2.02511  | 2.38519  |
| H | -10.97348 | 0.10876  | -0.98135 |
| C | -12.08812 | 2.36593  | 1.32234  |
| H | -11.37014 | 2.55141  | 3.33352  |
| H | -12.81643 | 3.16664  | 1.41806  |
| C | -11.96739 | 1.66254  | 0.09857  |
| H | -12.60984 | 1.92728  | -0.73745 |
| C | -11.04998 | 0.64628  | -0.04215 |
| C | -8.40327  | -0.96242 | -1.43712 |

|   |           |          |          |
|---|-----------|----------|----------|
| C | -9.07496  | -1.54273 | -0.36295 |
| C | -8.70388  | -2.95214 | -2.78509 |
| C | -9.59684  | -2.86646 | -0.50317 |
| C | -8.2155   | -1.6738  | -2.65036 |
| C | -9.40709  | -3.58337 | -1.73143 |
| C | -10.32301 | -3.51253 | 0.53817  |
| H | -7.67844  | -1.21728 | -3.47333 |
| H | -9.77294  | -5.42662 | -2.80213 |
| H | -8.55261  | -3.49284 | -3.71646 |
| C | -10.81956 | -4.78568 | 0.37659  |
| H | -10.49046 | -2.97819 | 1.4673   |
| H | -11.37378 | -5.25403 | 1.18604  |
| C | -10.61999 | -5.49315 | -0.83444 |
| H | -11.01631 | -6.49867 | -0.94675 |
| C | -9.92935  | -4.89861 | -1.86388 |
| O | -7.55905  | -2.13565 | 1.83484  |
| C | -7.36341  | 1.01052  | -2.35335 |
| C | -7.08861  | 2.44012  | -1.9024  |
| H | -6.45545  | 2.40541  | -1.00658 |
| H | -8.03741  | 2.90076  | -1.59948 |
| C | -6.40803  | 3.26946  | -3.001   |
| H | -7.03071  | 3.298    | -3.9046  |
| H | -5.46135  | 2.79653  | -3.28929 |
| C | -6.14384  | 4.70844  | -2.54855 |
| H | -5.60911  | 4.7323   | -1.58994 |
| H | -7.09068  | 5.23917  | -2.40939 |
| O | -5.43729  | 5.48109  | -3.5235  |
| C | -4.07551  | 5.38859  | -3.59618 |
| C | -1.28016  | 5.36074  | -3.87725 |
| C | -3.2957   | 4.50983  | -2.83772 |
| C | -3.44916  | 6.25549  | -4.50476 |
| C | -2.0649   | 6.23704  | -4.63644 |
| C | -1.89831  | 4.49068  | -2.97527 |
| H | -3.74903  | 3.82514  | -2.13141 |
| H | -4.06565  | 6.93311  | -5.08709 |
| H | -1.58825  | 6.91385  | -5.34073 |
| H | -0.2004   | 5.34662  | -3.99056 |
| C | -0.04918  | -2.32343 | 3.50551  |
| C | -0.72722  | -4.15362 | 5.52456  |
| C | 0.92961   | -2.78455 | 4.39246  |

|    |          |          |          |
|----|----------|----------|----------|
| C  | -1.36774 | -2.79566 | 3.62841  |
| C  | -1.7136  | -3.70246 | 4.63426  |
| C  | 0.58018  | -3.69782 | 5.39349  |
| H  | 1.95569  | -2.44447 | 4.29228  |
| H  | -2.10852 | -2.42106 | 2.93362  |
| H  | 1.34165  | -4.06245 | 6.07795  |
| H  | -1.00743 | -4.86036 | 6.29929  |
| O  | -2.97056 | -4.20481 | 4.82779  |
| C  | -4.02043 | -3.82273 | 3.93352  |
| H  | -3.66282 | -3.85874 | 2.89558  |
| H  | -4.77024 | -4.61045 | 4.04854  |
| C  | -4.60908 | -2.4444  | 4.26747  |
| H  | -3.78532 | -1.74432 | 4.44247  |
| H  | -5.15995 | -2.51236 | 5.21484  |
| C  | -5.50656 | -1.86814 | 3.15786  |
| H  | -4.95438 | -1.83223 | 2.20954  |
| H  | -5.75664 | -0.83007 | 3.40485  |
| O  | -7.94019 | 0.31199  | -1.25367 |
| C  | -6.79822 | -2.65634 | 2.92435  |
| H  | -8.05207 | 1.00378  | -3.21071 |
| H  | -6.42944 | 0.52057  | -2.66657 |
| H  | -6.57452 | -3.68486 | 2.62444  |
| H  | -7.40815 | -2.70742 | 3.83664  |
| N  | -0.65059 | 1.06985  | -1.97909 |
| N  | 0.65059  | 1.06982  | 1.979    |
| Zn | 0.       | 1.08153  | -0.00004 |

#### Optimized structure of 2c

|   |           |          |          |
|---|-----------|----------|----------|
| H | -10.87226 | -2.86707 | 2.72483  |
| C | -10.55019 | -2.38242 | 1.80822  |
| H | -12.52013 | -2.01777 | 1.05748  |
| C | -11.45127 | -1.91718 | 0.88417  |
| C | -8.65859  | -1.65087 | 0.43489  |
| C | -11.0025  | -1.30316 | -0.31413 |
| C | -9.15679  | -2.25003 | 1.58674  |
| C | -9.59296  | -1.1741  | -0.54652 |
| C | -11.9179  | -0.82825 | -1.29152 |
| H | -8.10922  | -0.50569 | -1.97391 |
| C | -11.47436 | -0.25683 | -2.46154 |
| H | -12.98309 | -0.93119 | -1.09639 |

|   |           |          |          |
|---|-----------|----------|----------|
| H | -12.18496 | 0.09989  | -3.20228 |
| C | -10.08458 | -0.14301 | -2.70316 |
| H | -9.73504  | 0.2954   | -3.63446 |
| C | -9.17192  | -0.58807 | -1.7727  |
| C | -6.58987  | -0.25284 | 0.31993  |
| C | -7.18308  | -1.51213 | 0.2197   |
| C | -4.38865  | -1.18249 | -0.08116 |
| C | -6.35862  | -2.64902 | -0.05554 |
| C | -5.1889   | -0.09075 | 0.16528  |
| C | -4.93992  | -2.4822  | -0.19987 |
| C | -6.89279  | -3.96162 | -0.19891 |
| H | -4.73669  | 0.89026  | 0.24953  |
| H | -3.04803  | -3.46915 | -0.55821 |
| H | -3.31475  | -1.04933 | -0.19034 |
| C | -6.07404  | -5.03702 | -0.45855 |
| H | -7.96331  | -4.10467 | -0.10266 |
| H | -6.50732  | -6.02814 | -0.56554 |
| C | -4.67331  | -4.86885 | -0.58686 |
| H | -4.04056  | -5.72919 | -0.78734 |
| C | -4.12143  | -3.61537 | -0.46103 |
| O | -8.33422  | -2.82182 | 2.53396  |
| C | -6.815    | 2.72346  | -0.76456 |
| H | -7.77206  | 2.63303  | -1.29266 |
| H | -6.08604  | 2.13019  | -1.33094 |
| C | -6.35487  | 4.18775  | -0.72006 |
| H | -5.46524  | 4.26255  | -0.07589 |
| H | -7.12747  | 4.80715  | -0.24194 |
| C | -6.00744  | 4.75299  | -2.10513 |
| H | -6.89428  | 4.76916  | -2.7508  |
| H | -5.28413  | 4.08753  | -2.59017 |
| C | -5.41367  | 6.16546  | -2.02301 |
| H | -4.70169  | 6.24489  | -1.19019 |
| H | -6.19931  | 6.90726  | -1.8527  |
| O | -4.7828   | 6.58312  | -3.23818 |
| C | -3.54041  | 6.09779  | -3.53566 |
| C | -1.00574  | 5.18321  | -4.32962 |
| C | -2.82883  | 5.19628  | -2.73742 |
| C | -2.97073  | 6.55314  | -4.73445 |
| C | -1.71225  | 6.10054  | -5.11611 |
| C | -1.56803  | 4.72185  | -3.13518 |

|   |          |          |          |
|---|----------|----------|----------|
| H | -3.24285 | 4.82321  | -1.80955 |
| H | -3.52987 | 7.2566   | -5.3433  |
| H | -1.27382 | 6.46515  | -6.04135 |
| H | -0.02614 | 4.83182  | -4.63914 |
| N | 0.00006  | -0.74288 | 0.00009  |
| N | 0.00012  | 3.2645   | -0.00014 |
| C | 0.44813  | 4.09194  | 0.99112  |
| C | -0.44789 | 4.09183  | -0.99149 |
| C | -0.87035 | 2.377    | -2.75565 |
| C | -0.49805 | 0.14545  | -2.84624 |
| C | -0.06476 | -1.57063 | -1.0872  |
| C | 0.06486  | -1.5705  | 1.08748  |
| C | 0.49817  | 0.14578  | 2.84633  |
| C | 0.87053  | 2.37731  | 2.75548  |
| C | 1.1656   | 1.92756  | 4.08609  |
| C | 0.91823  | 3.69177  | 2.26107  |
| C | 0.29206  | 5.49251  | 0.61132  |
| C | -0.91801 | 3.69152  | -2.2614  |
| C | 0.90212  | 0.58414  | 4.15083  |
| C | 0.24282  | -1.16985 | 2.42985  |
| C | 0.02699  | -2.97067 | 0.67826  |
| C | -1.16546 | 1.9271   | -4.0862  |
| C | -0.24272 | -1.17014 | -2.42961 |
| C | -0.02692 | -2.97075 | -0.67781 |
| C | -0.2918  | 5.49244  | -0.61186 |
| C | -0.90201 | 0.58367  | -4.15078 |
| H | -1.51338 | 2.5655   | -4.88439 |
| H | -0.56893 | 6.343    | -1.21869 |
| H | 0.05664  | -3.8217  | 1.34383  |
| H | 0.56919  | 6.34313  | 1.21806  |
| H | -1.00399 | -0.0658  | -5.00758 |
| H | 1.00407  | -0.06523 | 5.0077   |
| H | -0.0566  | -3.82185 | -1.34328 |
| H | 1.51351  | 2.56605  | 4.88421  |
| C | 0.16185  | -2.2269  | 3.49133  |
| C | -0.10175 | -4.23367 | 5.42935  |
| C | 1.29574  | -2.72413 | 4.14112  |
| C | -1.1068  | -2.73286 | 3.81869  |
| C | -1.24456 | -3.74247 | 4.77801  |
| C | 1.15141  | -3.72447 | 5.10925  |



|   |          |          |          |
|---|----------|----------|----------|
| H | 2.27977  | -2.34606 | 3.88105  |
| H | -1.9696  | -2.32278 | 3.30848  |
| H | 2.03112  | -4.11743 | 5.61208  |
| H | -0.22388 | -5.01618 | 6.1717   |
| O | -2.42618 | -4.32494 | 5.13382  |
| C | -3.64919 | -3.85685 | 4.55104  |
| H | -3.50886 | -3.64698 | 3.48342  |
| H | -4.32873 | -4.70983 | 4.62429  |
| C | -4.2115  | -2.64296 | 5.30142  |
| H | -3.39003 | -1.94673 | 5.51026  |
| H | -4.588   | -2.97987 | 6.27585  |
| C | -5.31105 | -1.8929  | 4.5317   |
| H | -4.86211 | -1.39109 | 3.66242  |
| H | -5.70061 | -1.0929  | 5.17668  |
| O | -7.43444 | 0.78072  | 0.62963  |
| C | -6.46841 | -2.77103 | 4.03419  |
| H | -6.10332 | -3.48271 | 3.28472  |
| H | -6.89176 | -3.36355 | 4.85632  |
| C | -7.56488 | -1.94303 | 3.36789  |
| C | -6.97226 | 2.13145  | 0.63785  |
| H | -6.03855 | 2.21744  | 1.21047  |
| H | -7.74428 | 2.67336  | 1.19304  |
| H | -8.22486 | -1.47458 | 4.11359  |
| H | -7.1251  | -1.1439  | 2.76319  |
| H | 10.87219 | -2.86767 | -2.72443 |
| C | 10.55009 | -2.38287 | -1.80791 |
| H | 12.52001 | -2.01821 | -1.05712 |
| C | 11.45115 | -1.91755 | -0.88388 |
| C | 8.65846  | -1.65102 | -0.43478 |
| C | 11.00236 | -1.30333 | 0.31431  |
| C | 9.15669  | -2.25037 | -1.58652 |
| C | 9.59281  | -1.17417 | 0.54661  |
| C | 11.91773 | -0.82833 | 1.29167  |
| H | 8.10903  | -0.50546 | 1.97382  |
| C | 11.47416 | -0.25672 | 2.46159  |
| H | 12.98292 | -0.93135 | 1.09661  |
| H | 12.18474 | 0.10007  | 3.20232  |
| C | 10.08437 | -0.14279 | 2.70312  |
| H | 9.73481  | 0.29578  | 3.63434  |
| C | 9.17173  | -0.58794 | 1.77268  |

|   |         |          |          |
|---|---------|----------|----------|
| C | 6.58982 | -0.25287 | -0.32    |
| C | 7.18295 | -1.51218 | -0.21967 |
| C | 4.38853 | -1.18237 | 0.08106  |
| C | 6.35841 | -2.64901 | 0.0556   |
| C | 5.18884 | -0.09069 | -0.16541 |
| C | 4.93972 | -2.4821  | 0.19986  |
| C | 6.8925  | -3.96163 | 0.19905  |
| H | 4.7367  | 0.89035  | -0.24973 |
| H | 3.04776 | -3.46892 | 0.55819  |
| H | 3.31463 | -1.04914 | 0.19019  |
| C | 6.07369 | -5.03698 | 0.45872  |
| H | 7.96302 | -4.10475 | 0.10285  |
| H | 6.50691 | -6.02811 | 0.56578  |
| C | 4.67296 | -4.86871 | 0.58697  |
| H | 4.04016 | -5.72901 | 0.78747  |
| C | 4.12115 | -3.61522 | 0.46106  |
| O | 8.33415 | -2.82228 | -2.53369 |
| C | 6.81504 | 2.72348  | 0.76432  |
| H | 7.77205 | 2.63302  | 1.29249  |
| H | 6.086   | 2.13029  | 1.33069  |
| C | 6.355   | 4.1878   | 0.71971  |
| H | 5.46542 | 4.26263  | 0.07548  |
| H | 7.12767 | 4.80712  | 0.24161  |
| C | 6.00753 | 4.75314  | 2.10473  |
| H | 6.89433 | 4.76926  | 2.75047  |
| H | 5.28411 | 4.08777  | 2.58975  |
| C | 5.4139  | 6.16567  | 2.02251  |
| H | 4.70196 | 6.24512  | 1.18965  |
| H | 6.19962 | 6.90738  | 1.85218  |
| O | 4.78302 | 6.58345  | 3.23762  |
| C | 3.54061 | 6.09817  | 3.53512  |
| C | 1.00591 | 5.1837   | 4.32912  |
| C | 2.82905 | 5.19656  | 2.73698  |
| C | 2.9709  | 6.55367  | 4.73384  |
| C | 1.7124  | 6.10113  | 5.11551  |
| C | 1.56824 | 4.72219  | 3.13476  |
| H | 3.2431  | 4.82337  | 1.80917  |
| H | 3.53003 | 7.2572   | 5.34262  |
| H | 1.27395 | 6.46586  | 6.04069  |
| H | 0.02629 | 4.83237  | 4.63865  |

|    |          |          |          |
|----|----------|----------|----------|
| C  | -0.16182 | -2.22731 | -3.49096 |
| C  | 0.10166  | -4.23433 | -5.42876 |
| C  | -1.29574 | -2.72459 | -4.14065 |
| C  | 1.10682  | -2.73334 | -3.81832 |
| C  | 1.24451  | -3.74307 | -4.77752 |
| C  | -1.15147 | -3.72506 | -5.10867 |
| H  | -2.27975 | -2.34647 | -3.88059 |
| H  | 1.96964  | -2.32323 | -3.30818 |
| H  | -2.03121 | -4.11806 | -5.61142 |
| H  | 0.22375  | -5.01693 | -6.17102 |
| O  | 2.4261   | -4.32561 | -5.1333  |
| C  | 3.64914  | -3.85746 | -4.55063 |
| H  | 3.50884  | -3.6474  | -3.48305 |
| H  | 4.32865  | -4.71048 | -4.62375 |
| C  | 4.21148  | -2.64373 | -5.30124 |
| H  | 3.39004  | -1.9475  | -5.51019 |
| H  | 4.58796  | -2.98083 | -6.27561 |
| C  | 5.31107  | -1.89358 | -4.53167 |
| H  | 4.86216  | -1.39157 | -3.66248 |
| H  | 5.70068  | -1.09372 | -5.1768  |
| O  | 7.43446  | 0.78063  | -0.62972 |
| C  | 6.46839  | -2.77167 | -4.03399 |
| H  | 6.10325  | -3.4832  | -3.28439 |
| H  | 6.89171  | -3.36436 | -4.856   |
| C  | 7.56488  | -1.94361 | -3.36781 |
| C  | 6.97235  | 2.13138  | -0.63805 |
| H  | 6.03869  | 2.21739  | -1.21072 |
| H  | 7.74443  | 2.67322  | -1.19322 |
| H  | 8.22491  | -1.47534 | -4.11358 |
| H  | 7.12514  | -1.14432 | -2.76328 |
| N  | 0.48015  | 1.26521  | 2.04756  |
| N  | -0.47997 | 1.26498  | -2.04761 |
| Zn | 0.00009  | 1.26295  | -0.00003 |

**Optimized structure of 2d**

|   |         |         |          |
|---|---------|---------|----------|
| C | 0.38915 | 2.31183 | -2.18333 |
| C | 0.50081 | 2.22174 | -3.63369 |
| H | 0.54974 | 3.06026 | -4.31378 |
| C | 0.47486 | 0.90014 | -3.93889 |
| H | 0.50948 | 0.44363 | -4.91752 |

|   |          |          |          |
|---|----------|----------|----------|
| C | 0.39329  | 0.18627  | -2.66975 |
| N | 0.33845  | 1.0657   | -1.62007 |
| C | 0.37111  | -1.22114 | -2.56559 |
| C | 0.38318  | -1.94107 | -1.35797 |
| C | 0.52553  | -3.36004 | -1.20624 |
| H | 0.61203  | -4.05471 | -2.02826 |
| C | 0.55013  | -3.6464  | 0.13298  |
| H | 0.64551  | -4.61719 | 0.59564  |
| C | 0.40148  | -2.41665 | 0.85535  |
| N | 0.31284  | -1.41922 | -0.08737 |
| C | 0.29125  | -2.26318 | 2.24863  |
| C | -0.02963 | -1.05548 | 2.90418  |
| C | -0.22857 | -0.94983 | 4.34552  |
| H | -0.1283  | -1.75722 | 5.05641  |
| C | -0.56946 | 0.33916  | 4.59137  |
| H | -0.79947 | 0.7966   | 5.54302  |
| C | -0.53061 | 1.02779  | 3.307    |
| N | -0.2111  | 0.16033  | 2.29795  |
| C | -0.74615 | 2.41637  | 3.17471  |
| C | -0.56661 | 3.15708  | 1.99778  |
| C | -0.62168 | 4.58514  | 1.86198  |
| H | -0.86071 | 5.26331  | 2.66803  |
| C | -0.2937  | 4.9043   | 0.57118  |
| H | -0.22598 | 5.88899  | 0.13246  |
| C | -0.05551 | 3.68282  | -0.14377 |
| N | -0.23022 | 2.66045  | 0.76036  |
| C | 0.26168  | 3.54203  | -1.50142 |
| C | 0.25906  | -2.03621 | -3.81874 |
| C | -0.95    | -2.71528 | -4.04622 |
| H | -1.74392 | -2.61803 | -3.31665 |
| C | -1.13123 | -3.47996 | -5.20326 |
| C | -0.09606 | -3.56284 | -6.14747 |
| H | -0.25121 | -4.15966 | -7.04084 |
| C | 1.10081  | -2.89322 | -5.91801 |
| H | 1.90286  | -2.97017 | -6.64744 |
| C | 1.29032  | -2.13238 | -4.75865 |
| H | 2.23381  | -1.62496 | -4.58191 |
| C | 0.53668  | -3.49168 | 3.07205  |
| C | -0.49352 | -4.12212 | 3.77843  |
| H | -1.50301 | -3.72597 | 3.72729  |

|   |          |          |          |
|---|----------|----------|----------|
| C | -0.21745 | -5.26441 | 4.53699  |
| H | -1.01866 | -5.75527 | 5.08329  |
| C | 1.06876  | -5.78783 | 4.59388  |
| H | 1.29648  | -6.67581 | 5.17524  |
| C | 2.10649  | -5.16557 | 3.8825   |
| C | 1.83897  | -4.01882 | 3.12626  |
| H | 2.63044  | -3.50874 | 2.59019  |
| C | -1.2096  | 3.17701  | 4.38474  |
| C | -2.58317 | 3.43081  | 4.52299  |
| H | -3.25094 | 3.08513  | 3.74343  |
| C | -3.0738  | 4.09499  | 5.65373  |
| C | -2.17659 | 4.52194  | 6.64499  |
| H | -2.57123 | 5.03871  | 7.5142   |
| C | -0.81528 | 4.28115  | 6.49789  |
| H | -0.12757 | 4.61954  | 7.26845  |
| C | -0.32163 | 3.60867  | 5.37432  |
| H | 0.74143  | 3.4149   | 5.26884  |
| C | 0.48337  | 4.80007  | -2.29034 |
| C | -0.57771 | 5.56587  | -2.78211 |
| H | -1.6014  | 5.26595  | -2.57974 |
| C | -0.30764 | 6.70115  | -3.55473 |
| H | -1.12995 | 7.29566  | -3.94407 |
| C | 1.00018  | 7.0781   | -3.83842 |
| H | 1.22054  | 7.95556  | -4.43828 |
| C | 2.07089  | 6.32004  | -3.33926 |
| C | 1.80511  | 5.18599  | -2.56276 |
| H | 2.60858  | 4.57917  | -2.1642  |
| O | -2.26994 | -4.173   | -5.48695 |
| C | -3.28928 | -4.22826 | -4.482   |
| H | -3.69495 | -3.22303 | -4.3114  |
| H | -2.84881 | -4.58213 | -3.53815 |
| C | -4.36669 | -5.20008 | -4.94941 |
| H | -4.9086  | -4.76936 | -5.80118 |
| H | -3.86302 | -6.10202 | -5.3184  |
| C | -5.34235 | -5.59027 | -3.82679 |
| H | -4.76292 | -5.98366 | -2.97789 |
| H | -5.9616  | -6.42687 | -4.17866 |
| C | -6.26822 | -4.46821 | -3.32924 |
| H | -6.93318 | -4.15695 | -4.14832 |
| H | -5.69447 | -3.57848 | -3.04732 |

|   |          |          |          |
|---|----------|----------|----------|
| C | -7.10586 | -4.91985 | -2.12533 |
| H | -7.61632 | -5.86499 | -2.36113 |
| H | -6.44488 | -5.12672 | -1.27338 |
| C | -8.1787  | -3.93361 | -1.68319 |
| H | -8.88455 | -3.7368  | -2.50427 |
| H | -8.74659 | -4.35585 | -0.84176 |
| O | -7.54845 | -2.71684 | -1.28695 |
| C | -7.16011 | 0.63156  | 3.89783  |
| H | -7.84912 | 0.47104  | 3.06167  |
| H | -7.73655 | 0.45711  | 4.81695  |
| C | -5.75248 | 2.50663  | 5.00285  |
| H | -6.22224 | 2.31811  | 5.97722  |
| H | -4.84081 | 1.89885  | 4.9768   |
| C | 4.4629   | 6.12212  | -3.09054 |
| H | 4.28526  | 5.93247  | -2.02328 |
| H | 5.26224  | 6.86612  | -3.16179 |
| C | 4.86691  | 4.83545  | -3.81642 |
| H | 3.98554  | 4.19491  | -3.92973 |
| H | 5.19886  | 5.0863   | -4.8324  |
| C | 5.97382  | 4.08773  | -3.05828 |
| H | 5.64016  | 3.88993  | -2.0299  |
| H | 6.85193  | 4.74113  | -2.96064 |
| C | 7.62307  | -3.69676 | 0.16639  |
| H | 8.17994  | -3.56104 | 1.10452  |
| H | 8.30018  | -4.16851 | -0.56094 |
| C | 6.39207  | -4.57445 | 0.37118  |
| H | 5.65793  | -3.99578 | 0.943    |
| H | 5.94142  | -4.76885 | -0.60966 |
| C | 6.7226   | -5.89993 | 1.0834   |
| H | 5.94659  | -6.64023 | 0.84829  |
| H | 7.64995  | -6.30617 | 0.65585  |
| C | 6.86744  | -5.79258 | 2.62146  |
| H | 7.19038  | -4.77888 | 2.89753  |
| H | 7.66782  | -6.4627  | 2.95795  |
| C | 4.40939  | -5.24402 | 3.19003  |
| H | 4.64651  | -4.2106  | 3.48032  |
| H | 4.10273  | -5.2387  | 2.13558  |
| C | 5.60301  | -6.16392 | 3.41762  |
| H | 5.30012  | -7.18895 | 3.16614  |
| H | 5.8336   | -6.16114 | 4.49033  |

|   |           |          |          |
|---|-----------|----------|----------|
| C | -8.32737  | -1.66197 | -0.89628 |
| C | -9.72968  | -1.77997 | -0.70849 |
| H | -10.22521 | -2.72854 | -0.87643 |
| C | -10.46934 | -0.69373 | -0.30393 |
| H | -11.54243 | -0.79471 | -0.15886 |
| C | -9.86071  | 0.56344  | -0.07596 |
| C | -10.61506 | 1.69773  | 0.32995  |
| H | -11.68687 | 1.58199  | 0.47629  |
| C | -10.01018 | 2.9163   | 0.52943  |
| H | -10.59694 | 3.77774  | 0.83676  |
| C | -8.61451  | 3.04791  | 0.32397  |
| H | -8.13993  | 4.01507  | 0.4694   |
| C | -7.85472  | 1.96773  | -0.06445 |
| H | -6.78879  | 2.08398  | -0.22902 |
| C | -8.44476  | 0.68733  | -0.27317 |
| C | -7.67773  | -0.4486  | -0.68105 |
| C | -6.20144  | -0.33203 | -0.88983 |
| C | -5.34436  | -0.31357 | 0.20897  |
| C | -3.94426  | -0.15083 | 0.04085  |
| H | -3.28167  | -0.1323  | 0.89868  |
| C | -3.41231  | -0.01107 | -1.22005 |
| H | -2.34175  | 0.13457  | -1.33833 |
| C | -4.23765  | -0.03656 | -2.37115 |
| C | -3.69886  | 0.10303  | -3.68    |
| H | -2.62488  | 0.23343  | -3.78868 |
| C | -4.51586  | 0.08243  | -4.78724 |
| H | -4.0934   | 0.19118  | -5.78246 |
| C | -5.91502  | -0.07108 | -4.6255  |
| H | -6.55894  | -0.07786 | -5.50147 |
| C | -6.4679   | -0.20506 | -3.37209 |
| H | -7.54173  | -0.31131 | -3.26007 |
| C | -5.65362  | -0.19899 | -2.20291 |
| O | -5.92882  | -0.45104 | 1.43775  |
| C | -5.12862  | -0.32821 | 2.61226  |
| H | -4.59184  | 0.63073  | 2.5996   |
| H | -4.37545  | -1.12804 | 2.6427   |
| C | -6.0461   | -0.42886 | 3.82626  |
| H | -6.50859  | -1.42379 | 3.82827  |
| H | -5.40844  | -0.38275 | 4.71923  |
| C | -6.69835  | 2.09848  | 3.86377  |

|   |          |          |          |
|---|----------|----------|----------|
| H | -7.59213 | 2.73736  | 3.88762  |
| H | -6.21848 | 2.30586  | 2.8973   |
| C | -5.37124 | 3.98664  | 4.91628  |
| H | -5.02671 | 4.24866  | 3.9067   |
| H | -6.23794 | 4.61655  | 5.13843  |
| O | -4.38937 | 4.37693  | 5.88292  |
| O | 3.31911  | 6.76847  | -3.66097 |
| C | 6.42839  | 2.76682  | -3.70336 |
| H | 6.85948  | 2.9769   | -4.69203 |
| H | 7.23599  | 2.3503   | -3.09203 |
| C | 5.33862  | 1.69219  | -3.87437 |
| H | 5.79826  | 0.79095  | -4.29884 |
| H | 4.57829  | 2.02106  | -4.59492 |
| C | 4.60668  | 1.30348  | -2.59418 |
| H | 4.08315  | 2.16766  | -2.16317 |
| H | 3.85119  | 0.53378  | -2.80435 |
| O | 5.56945  | 0.80527  | -1.66612 |
| C | 5.17475  | 0.47016  | -0.40084 |
| C | 3.82694  | 0.56679  | 0.03407  |
| H | 3.04812  | 0.90041  | -0.64216 |
| C | 3.49003  | 0.21274  | 1.31972  |
| H | 2.45545  | 0.28886  | 1.64473  |
| C | 4.46823  | -0.25264 | 2.23278  |
| C | 4.12971  | -0.62927 | 3.56146  |
| H | 3.09129  | -0.54958 | 3.87459  |
| C | 5.09089  | -1.08324 | 4.43611  |
| H | 4.82141  | -1.36461 | 5.45058  |
| C | 6.44039  | -1.16952 | 4.01241  |
| H | 7.20113  | -1.51237 | 4.70962  |
| C | 6.80016  | -0.81306 | 2.7317   |
| H | 7.83938  | -0.87074 | 2.42444  |
| C | 5.83123  | -0.35035 | 1.7946   |
| C | 6.17379  | 0.01568  | 0.45655  |
| C | 7.57831  | -0.1263  | -0.03585 |
| C | 8.45339  | 0.9995   | -0.14979 |
| C | 8.0407   | 2.31908  | 0.18975  |
| H | 7.02757  | 2.47148  | 0.54714  |
| C | 8.90565  | 3.38512  | 0.0811   |
| H | 8.5684   | 4.38281  | 0.3505   |
| C | 10.23369 | 3.19492  | -0.37275 |



|    |          |          |          |
|----|----------|----------|----------|
| H  | 10.9052  | 4.04531  | -0.45513 |
| C  | 10.66852 | 1.93193  | -0.70166 |
| H  | 11.68792 | 1.77115  | -1.04589 |
| C  | 9.80336  | 0.80962  | -0.59764 |
| C  | 10.24023 | -0.50098 | -0.91707 |
| H  | 11.26309 | -0.6468  | -1.25666 |
| C  | 9.39229  | -1.57668 | -0.80687 |
| H  | 9.737    | -2.57123 | -1.06974 |
| C  | 8.05553  | -1.38803 | -0.37168 |
| O  | 7.166    | -2.4289  | -0.30486 |
| O  | 3.33479  | -5.74602 | 3.99152  |
| Zn | 0.05249  | 0.61682  | 0.33772  |
